# Supplementary material for: Tethered derivatives of d-glucose and pentacyclic triterpenes for homo/heterobivalent inhibition of glycogen phosphorylase
Source: Royal Society of Chemistry journal article supplement (doi:10.1039/b9nj00602h), 2010-01-01
Supplement: b9nj00602h.pdf [file b9nj00602h.pdf]

## Supporting Information

### **Tethered derivatives of D-glucose and pentacyclic triterpenes for homo/heterobivalent inhibition of glycogen phosphorylase**

Keguang Cheng,<sup>a</sup> Jun Liu,<sup>b</sup> Hongbin Sun,<sup>\*a</sup> Éva Bokor,<sup>c</sup> Katalin Czifrák,<sup>c</sup> Bálint Kónya,<sup>c</sup> Marietta Tóth,<sup>c</sup> Tibor Docsa,<sup>d</sup> Pál Gergely,<sup>e</sup> and László Somsák<sup>\*c</sup>

<sup>a</sup>*Center for Drug Discovery, College of Pharmacy, China Pharmaceutical University, 24 Tongjiaxiang, Nanjing 210009, China*

<sup>b</sup>*Jiangsu Center for Drug Screening, China Pharmaceutical University, 24 Tongjiaxiang, Nanjing 210009, China*

<sup>c</sup>*Department of Organic Chemistry, University of Debrecen, POB 20, H-4010 Debrecen, Hungary*

<sup>d</sup>*Cell Biology and Signaling Research Group of the Hungarian Academy of Sciences at the Department of Medical Chemistry, Medical and Health Science Centre, University of Debrecen, Egyetem tér 1, H-4032 Debrecen, Hungary*

<sup>e</sup>*Department of Medical Chemistry, Medical and Health Science Centre, University of Debrecen, Egyetem tér 1, H-4032 Debrecen, Hungary*

Copies of <sup>1</sup>H NMR and <sup>13</sup>C NMR spectra of **5, 6, 16, 17, 18, 19, 20, 21, 22, 23, 24, 25, 26, 27, 28, 29, 30, 31, 32, 33, 34, 35, 36, 37, 38**.

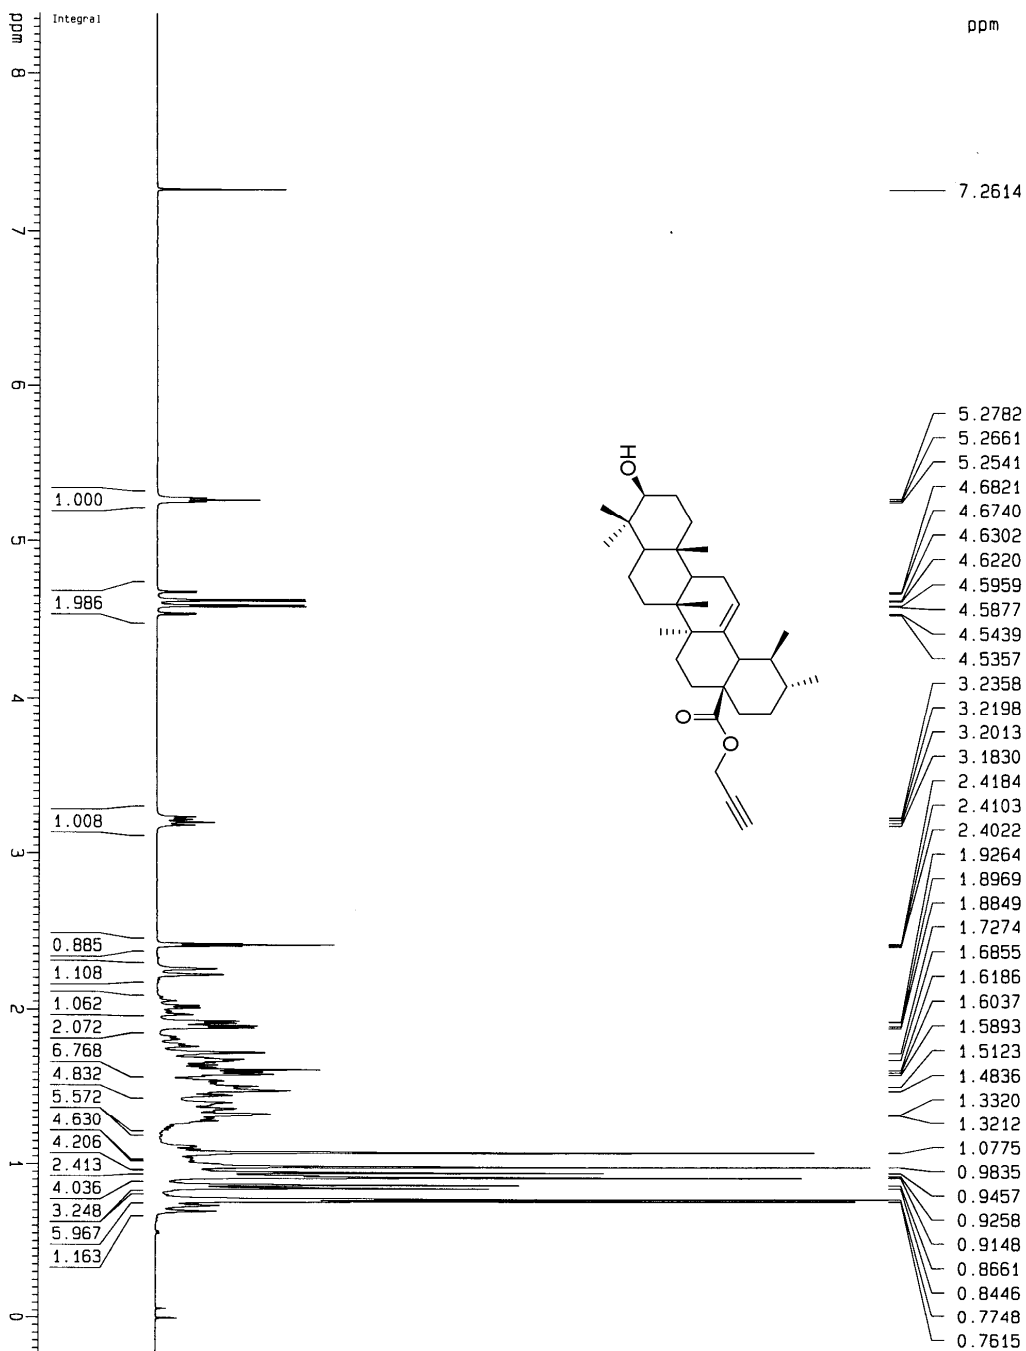

Current Data Parameters  
 NAME SNO  
 EXPRNO 514  
 PROCNO 1

F2 - Acquisition Parameters  
 Date\_ 20080308  
 Time 12.14  
 INSTRUM spect  
 PROBHD 5 mm QNP 1H/13  
 PULPROG zg30  
 TD 13512  
 SOLVENT CDCl3  
 NS 28  
 DS 0  
 SWH 5995.204 Hz  
 FIDRES 0.443695 Hz  
 AQ 1.1269507 sec  
 RG 32  
 DW 83.400 usec  
 DE 8.00 usec  
 TE 298.0 K  
 D1 2.00000000 sec

\*\*\*\*\* CHANNEL f1 \*\*\*\*\*  
 NUC1 1H  
 P1 6.00 usec  
 PL1 -4.00 dB  
 SF01 300.1324010 MHz

F2 - Processing parameters  
 SI 32768  
 SF 300.1300120 MHz  
 NDM EM  
 SSB 0  
 LB 0.10 Hz  
 GB 0  
 PC 1.00

1D NMR plot parameters:  
 CX 22.00 cm  
 CY 12.00 cm  
 F1P 8.387 dpm  
 F1 2517.21 Hz  
 F2P -67.43 Hz  
 F2 0.39144 dpm/cm  
 HZCM 117.48322 Hz/cm

KELLY-139B 13C-NMR CDCL3 303K AV-300

Current Data Parameters  
 NAME SIB  
 EXPNO 538  
 PROCNO 1

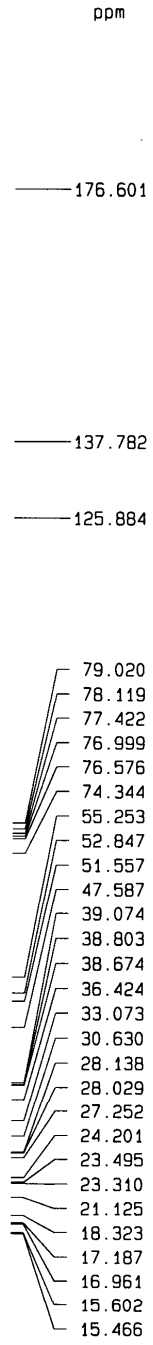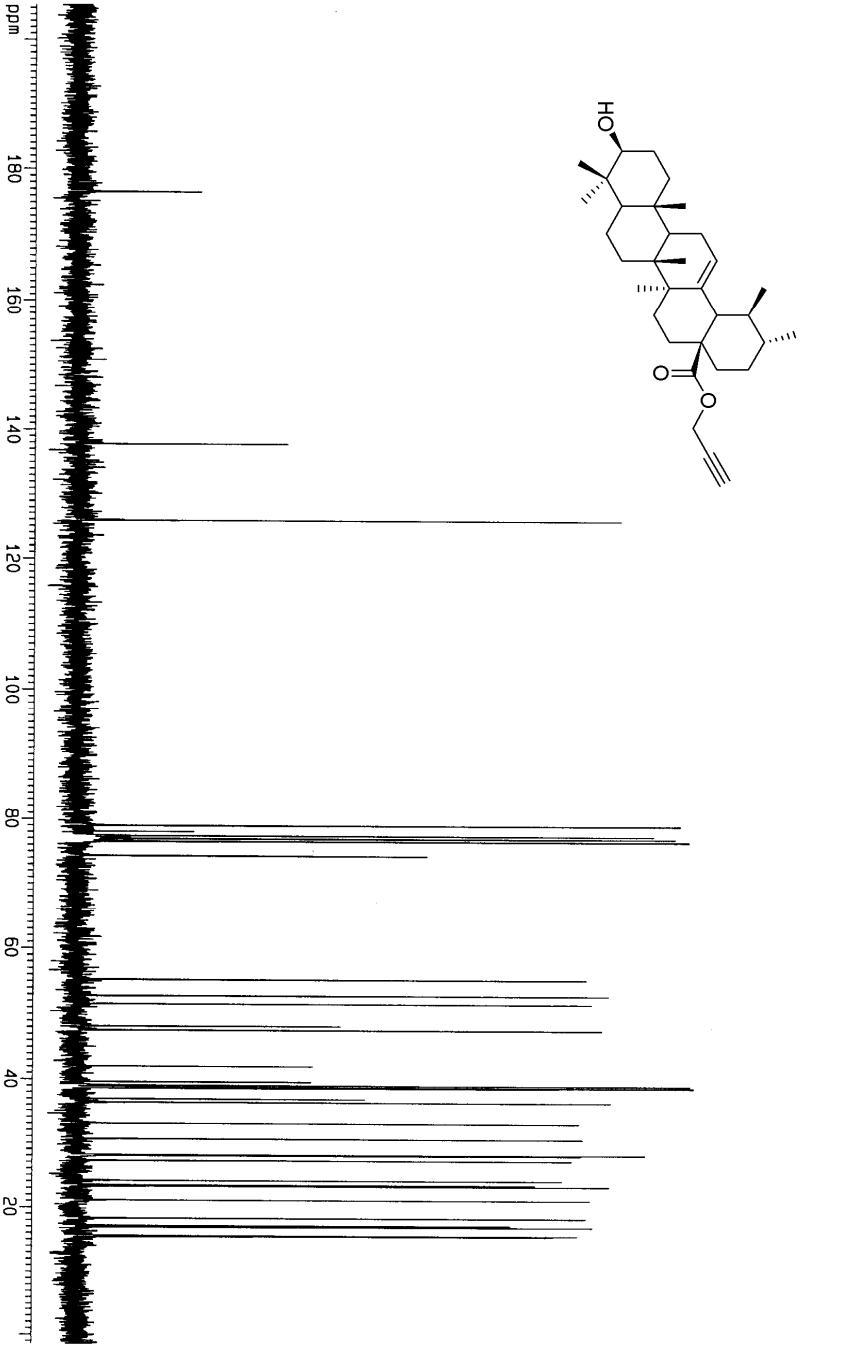

F2 - Acquisition Parameters

Date\_ 20080311  
 Time 16:31  
 INSTRUM spect  
 PROBRD 5 mm GNP 1H/13  
 PULPROG zgpgc  
 TD 32768  
 SOLVENT CDCL3  
 NS 451  
 DS 8  
 SFO1 75.4763978 MHz  
 SF02 300.1312005 MHz  
 FIDRES 0.552895 Hz  
 AQ 0.50444468 sec  
 RG 409500  
 DM 27.600 usec  
 DE 6.00 usec  
 TE 300.0 K  
 D1 2.00000000 sec  
 d11 0.03000000 sec

\*\*\*\*\* CHANNEL f1 \*\*\*\*\*  
 NUC1 13C  
 P1 8.00 usec  
 PL1 -2.00 dB  
 SFO1 75.4763978 MHz

\*\*\*\*\* CHANNEL f2 \*\*\*\*\*  
 CPDPRG2 waltz16  
 NUC2 1H  
 PPRD2 80.00 usec  
 PL2 -4.00 dB  
 PL12 19.25 dB  
 SF02 300.1312005 MHz

F2 - Processing parameters  
 SI 32768  
 SF 75.4677512 MHz  
 MDW EM  
 SSB 0  
 LB 1.00 Hz  
 GB 0  
 PC 1.00

1D NMR plot parameters  
 CX 22.00 cm  
 CY 10.00 cm  
 F1P 205.518 ppm  
 F1 15510.02 Hz  
 F2P -1.459 ppm  
 F2 -110.14 Hz  
 PPHCM 9.40809 ppm/cm  
 HZCM 710.00720 Hz/cm

KELLY-139C 1H-NMR CDCL3 303K AV-300

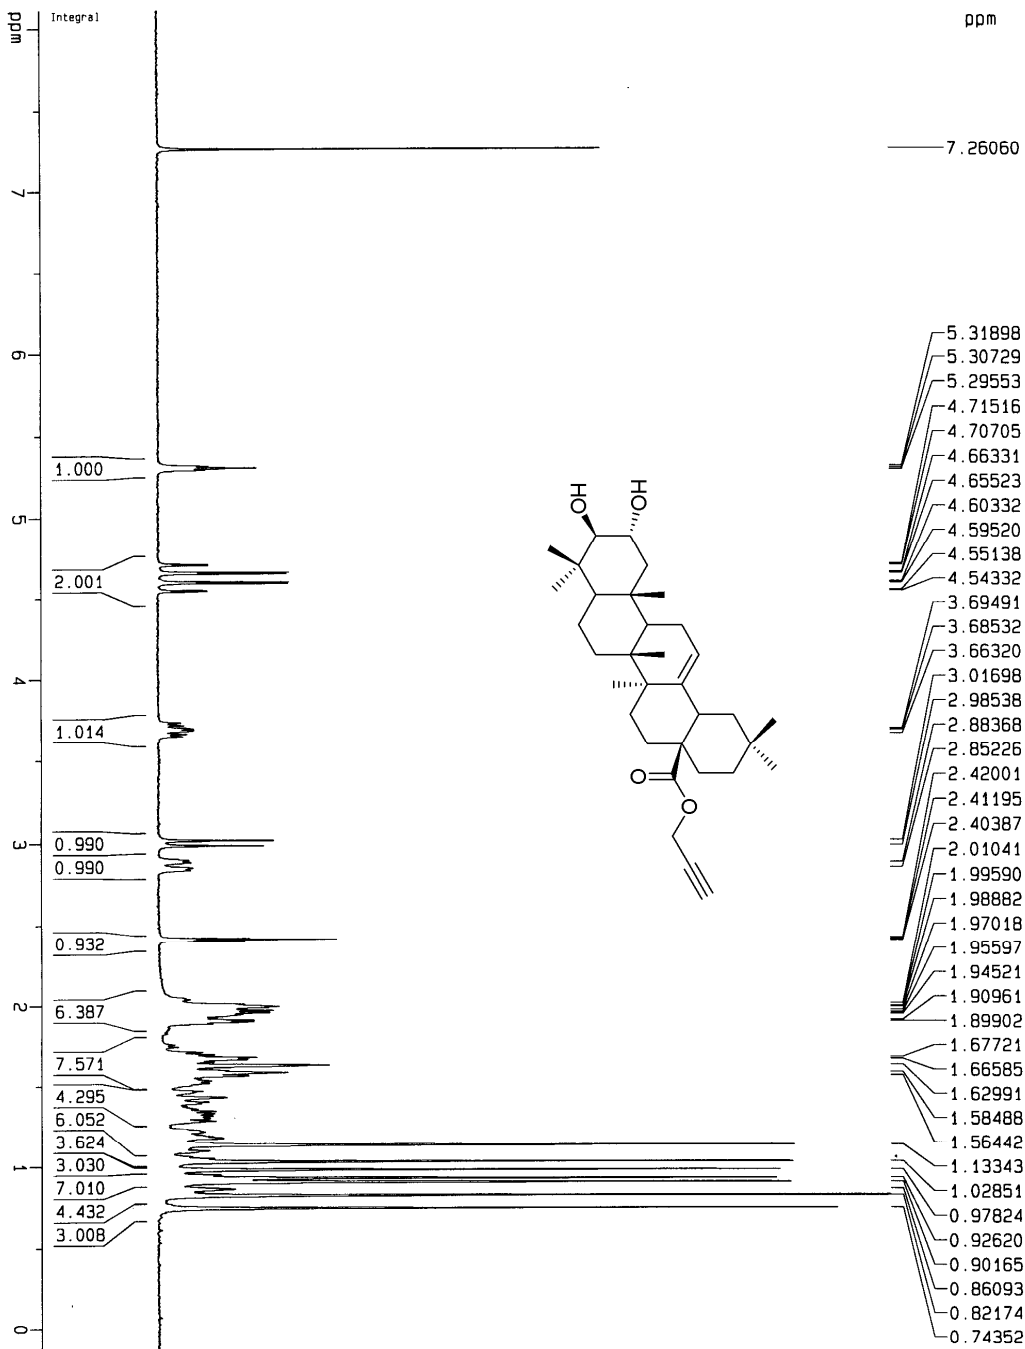

- 7.26060
- 5.31898
- 5.30729
- 5.29553
- 4.71516
- 4.70705
- 4.66331
- 4.65523
- 4.60332
- 4.59520
- 4.55138
- 4.54332
- 3.69491
- 3.68532
- 3.66320
- 3.01698
- 2.98538
- 2.88368
- 2.85226
- 2.42001
- 2.41195
- 2.40387
- 2.01041
- 1.99590
- 1.98882
- 1.97018
- 1.95597
- 1.94521
- 1.90961
- 1.89902
- 1.67721
- 1.66585
- 1.62991
- 1.58488
- 1.56442
- 1.13343
- 1.02851
- 0.97824
- 0.92620
- 0.90165
- 0.86093
- 0.82174
- 0.74352

Integral

1.000

2.001

1.014

0.990

0.990

0.932

6.387

7.571

4.295

6.052

3.624

3.030

7.010

4.432

3.008

Current Data Parameters

|        |     |
|--------|-----|
| NAME   | shb |
| EXPNO  | 536 |
| PROCNO | 1   |

F2 - Acquisition Parameters

|         |                |
|---------|----------------|
| Date_   | 20080311       |
| Time    | 15:57          |
| INSTRUM | spect          |
| PROBHD  | 5 mm QNP 1H/13 |
| PULPROG | zg30           |
| TD      | 13512          |
| SOLVENT | CDCl3          |
| NS      | 8              |
| DS      | 0              |
| SMH     | 3140.704 Hz    |
| FIDRES  | 0.232438 Hz    |
| AQ      | 2.1511605 sec  |
| RG      | 16             |
| DM      | 159.200 usec   |
| DE      | 6.00 usec      |
| TE      | 298.0 K        |
| D1      | 2.00000000 sec |

===== CHANNEL f1 =====

|      |                 |
|------|-----------------|
| NUC1 | 1H              |
| P1   | 6.00 usec       |
| PL1  | -4.00 dB        |
| SFO1 | 300.1313127 MHz |

F2 - Processing parameters

|     |                 |
|-----|-----------------|
| SI  | 32768           |
| SF  | 300.1300123 MHz |
| MDM | EN              |
| SSB | 0               |
| LB  | 0.30 Hz         |
| GB  | 0               |
| PC  | 1.00            |

1D NMR Plot parameters

|       |                 |
|-------|-----------------|
| CX    | 22.00 cm        |
| CY    | 12.00 cm        |
| F1P   | 8.111 ppm       |
| F1    | 2434.35 Hz      |
| F2P   | -0.141 ppm      |
| F2    | -42.41 Hz       |
| PPMCK | 0.37510 ppm/cm  |
| HZCM  | 112.57974 Hz/cm |

Kelly-139C C13-NMR CDC13 300K AV-300

Current Data Parameters  
 NAME shb  
 EXPNO 570  
 PROCNO 1

F2 - Acquisition Parameters  
 Date\_ 20080313  
 Time 22.04  
 INSTRUM spect  
 PROBRD 5 mm QNP 1H/13  
 PULPROG zgpg  
 TD 32768  
 SOLVENT CDCl3  
 NS 723  
 DS 8  
 SWH 18115.941 Hz  
 FIDRES 0.552855 Hz  
 AQ 0.904468 sec  
 RG 102400  
 DM 27.600 usec  
 DE 6.00 usec  
 TE 300.0 K  
 D1 2.00000000 sec  
 d11 0.03000000 sec

ppm

- 176.805
- 143.494
- 122.462
- 84.005
- 78.143
- 77.427
- 77.004
- 76.581
- 74.361
- 68.998
- 55.353
- 51.641
- 47.649
- 46.488
- 45.868
- 41.312
- 33.878
- 33.064
- 32.693
- 32.223
- 28.621
- 27.662
- 25.865
- 23.615
- 23.506
- 23.039
- 18.378
- 17.171
- 16.726
- 16.640

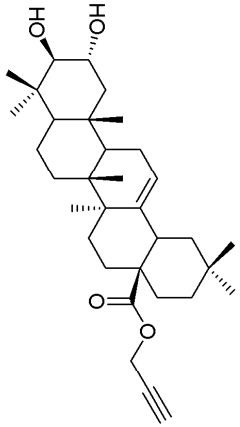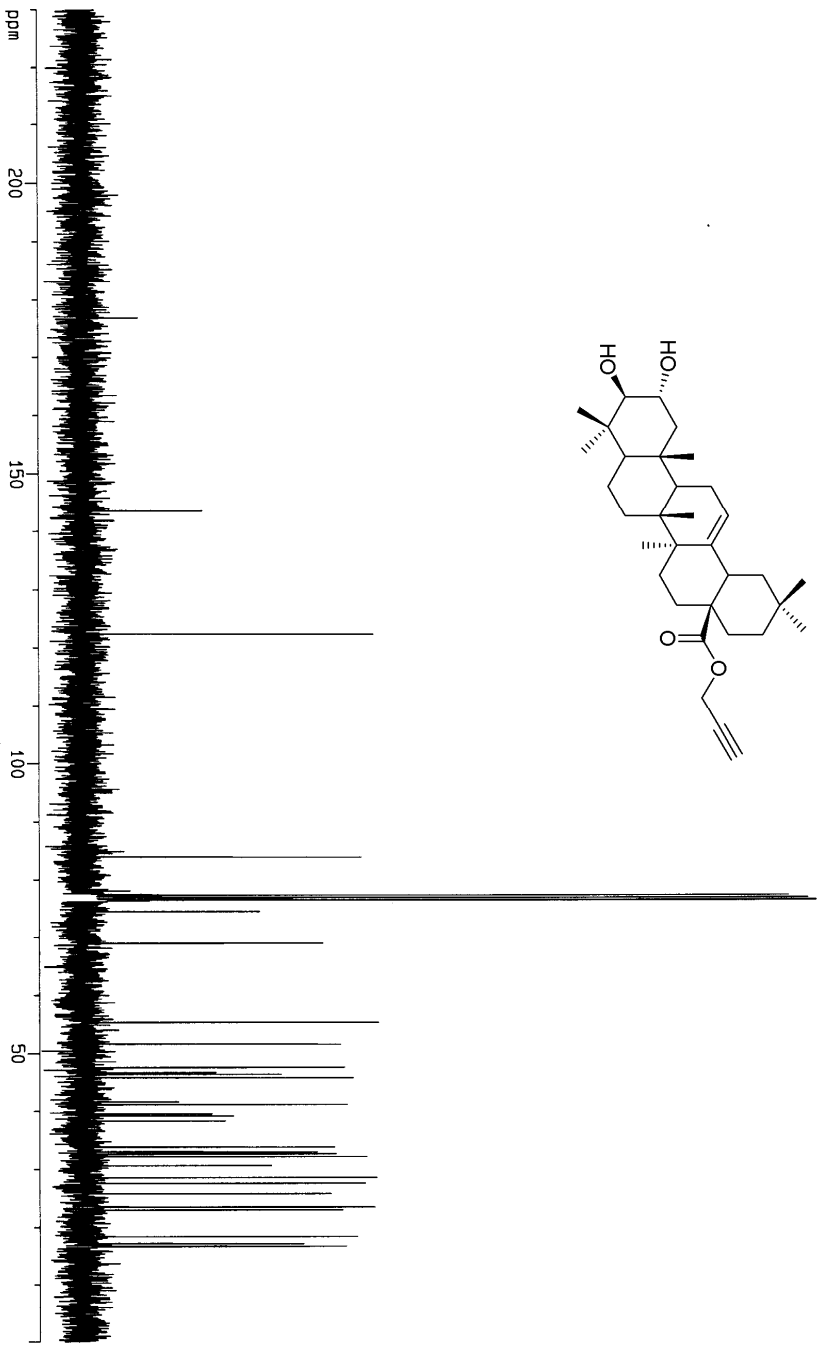

\*\*\*\*\* CHANNEL f1 \*\*\*\*\*  
 NUC1 13C  
 P1 8.00 usec  
 PL1 -2.00 dB  
 SF01 75.4763978 MHz

\*\*\*\*\* CHANNEL f2 \*\*\*\*\*  
 CPDPRG2 waltz16  
 NUC2 1H  
 P2 80.00 usec  
 PL2 -4.00 dB  
 PL12 19.25 dB  
 SF02 300.1312005 MHz

F2 - Processing parameters  
 SI 32768  
 SF 75.4677490 MHz  
 KGM EM  
 SSB 0  
 LB 1.00 Hz  
 GB 0  
 PC 1.00

10 NMR plot parameters  
 CX 22.00 cm  
 CY 12.00 cm  
 F1P 230.000 ppm  
 F1 17357.58 Hz  
 F2P 0.000 ppm  
 F2 0.00 Hz  
 PPKCM 10.43455 ppm/cm  
 HZCM 788.98108 Hz/cm

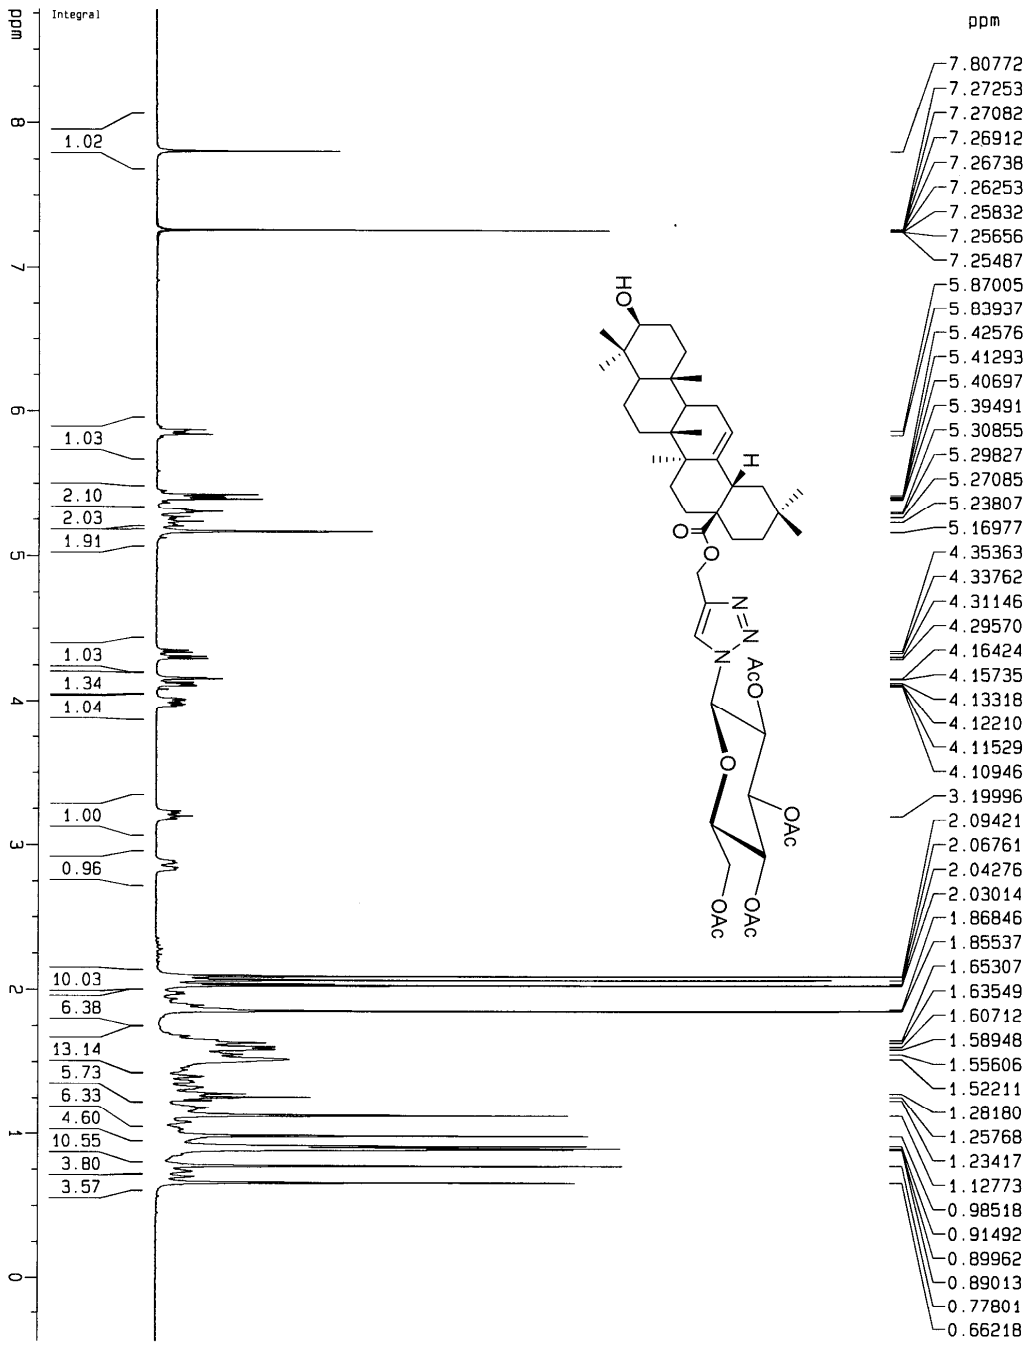

Current Data Parameters  
 NAME sbs  
 EXPNO 616  
 PROCNO 1

F2 - Acquisition Parameters  
 Date\_ 20080320  
 Time 22:22  
 INSTRUM spect  
 PROBHD 5 mm QNP 1H/13  
 PULPROG zgpg30  
 TD 11904  
 SOLVENT CDCl3  
 NS 24  
 DS 0  
 SWH 2976.190 Hz  
 FIDRES 0.250016 Hz  
 AQ 1.9999320 sec  
 RG 256  
 DM 168.000 usec  
 DE 6.00 usec  
 TE 298.0 K  
 D1 2.00000000 sec

\*\*\*\*\* CHANNEL f1 \*\*\*\*\*  
 NUC1 1H  
 P1 6.00 usec  
 PL1 -4.00 dB  
 SF01 300.1312724 MHz

F2 - Processing parameters  
 SI 32768  
 SF 300.1300115 MHz  
 KW EM  
 SSB 0  
 LB 0.10 Hz  
 GB 0  
 PC 1.00

1D NMR plot parameters  
 CX 22.00 cm  
 CY 12.00 cm  
 F1P 8.779 ppm  
 F1 2634.87 Hz  
 F2P -0.448 ppm  
 F2 -134.59 Hz  
 PPMCK 0.41943 ppm/cm  
 HZCM 125.88459 Hz/cm

Keyly-141 C13-NMR CDCl3 300K AV-300

Current Data Parameters  
 NAME SIB  
 EXNO 631  
 PROCNO 1

F2 - Acquisition Parameters

Date\_ 20080324  
 Time 10:39  
 INSTRUM spect  
 PROBD 5 mm QNP 1H/13  
 PULPROG zgpg  
 TD 32768  
 SOLVENT CDCl3  
 NS 2304  
 DS B  
 SH1 18115.941 Hz  
 FIDRES 0.55895 Hz  
 AQ 0.9044468 sec  
 RG 102400  
 DM 27.600 usec  
 DE 6.00 usec  
 TE 300.0 K  
 D1 2.0000000 sec  
 d11 0.0300000 sec

==== CHANNEL f1 =====

NUC1 13C  
 P1 8.00 usec  
 PL1 -2.00 dB  
 SFO1 75.4763978 MHz

==== CHANNEL f2 =====

CPDPRG2 waltz16  
 NUC2 1H  
 P2 80.00 usec  
 PCPD2 -4.00 dB  
 PL12 19.25 dB  
 SFO2 300.1312005 MHz

F2 - Processing parameters

S1 32768  
 SF 75.4677495 MHz  
 MDW EM  
 SSB 0  
 LB 1.00 Hz  
 GB 0  
 PC 1.00

1D NMR plot parameters

CX 22.50 cm  
 CY 12.00 cm  
 F1P 200.968 ppm  
 F1 15166.62 Hz  
 F2P -1.222 ppm  
 F2 -92.25 Hz  
 PPMCH 8.98625 ppm/cm  
 HZCM 678.17205 Hz/cm

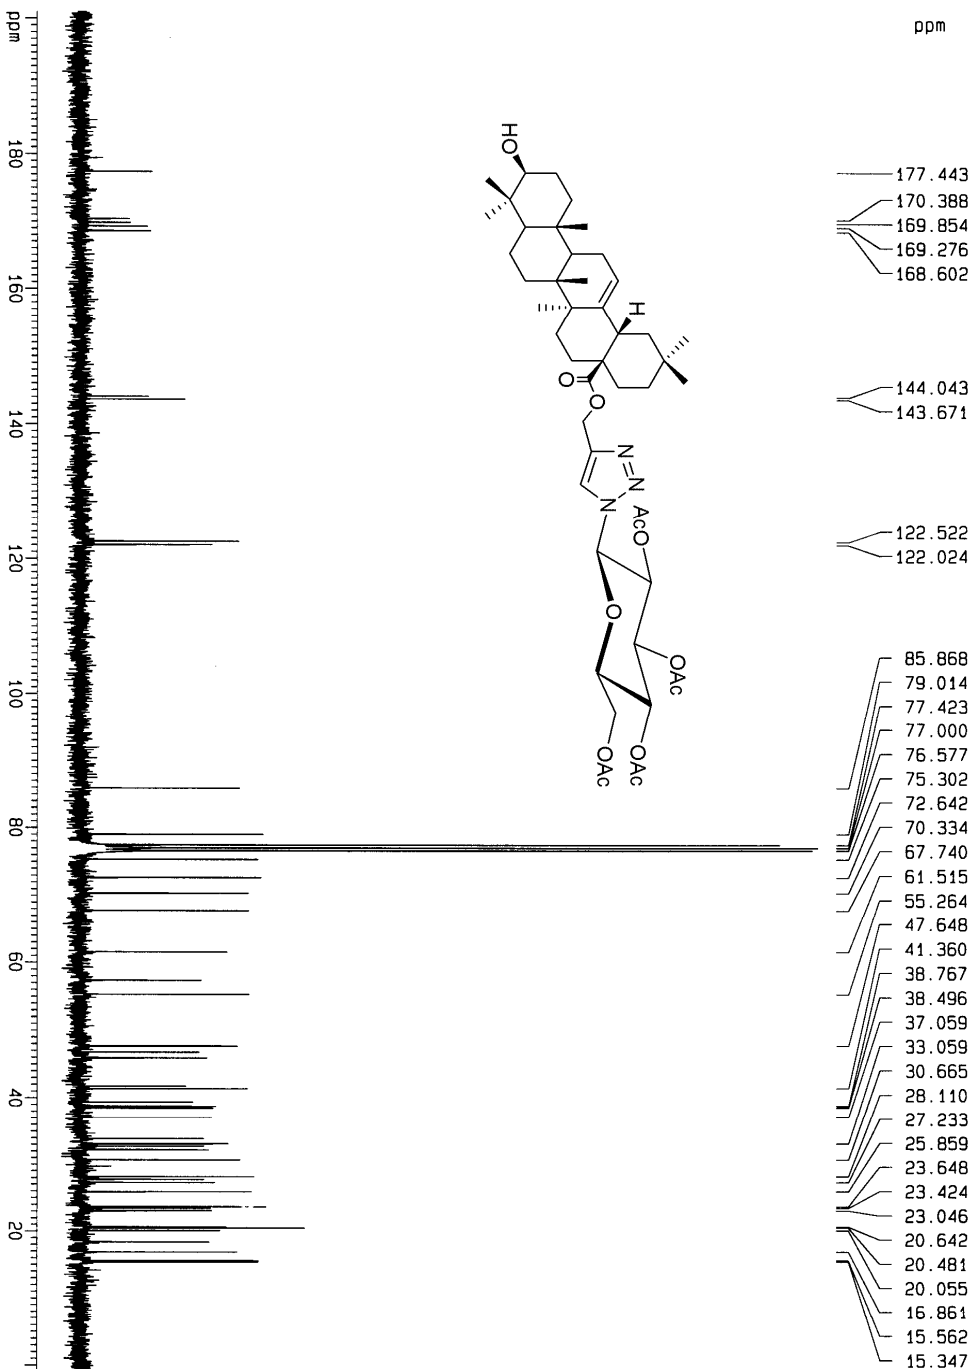

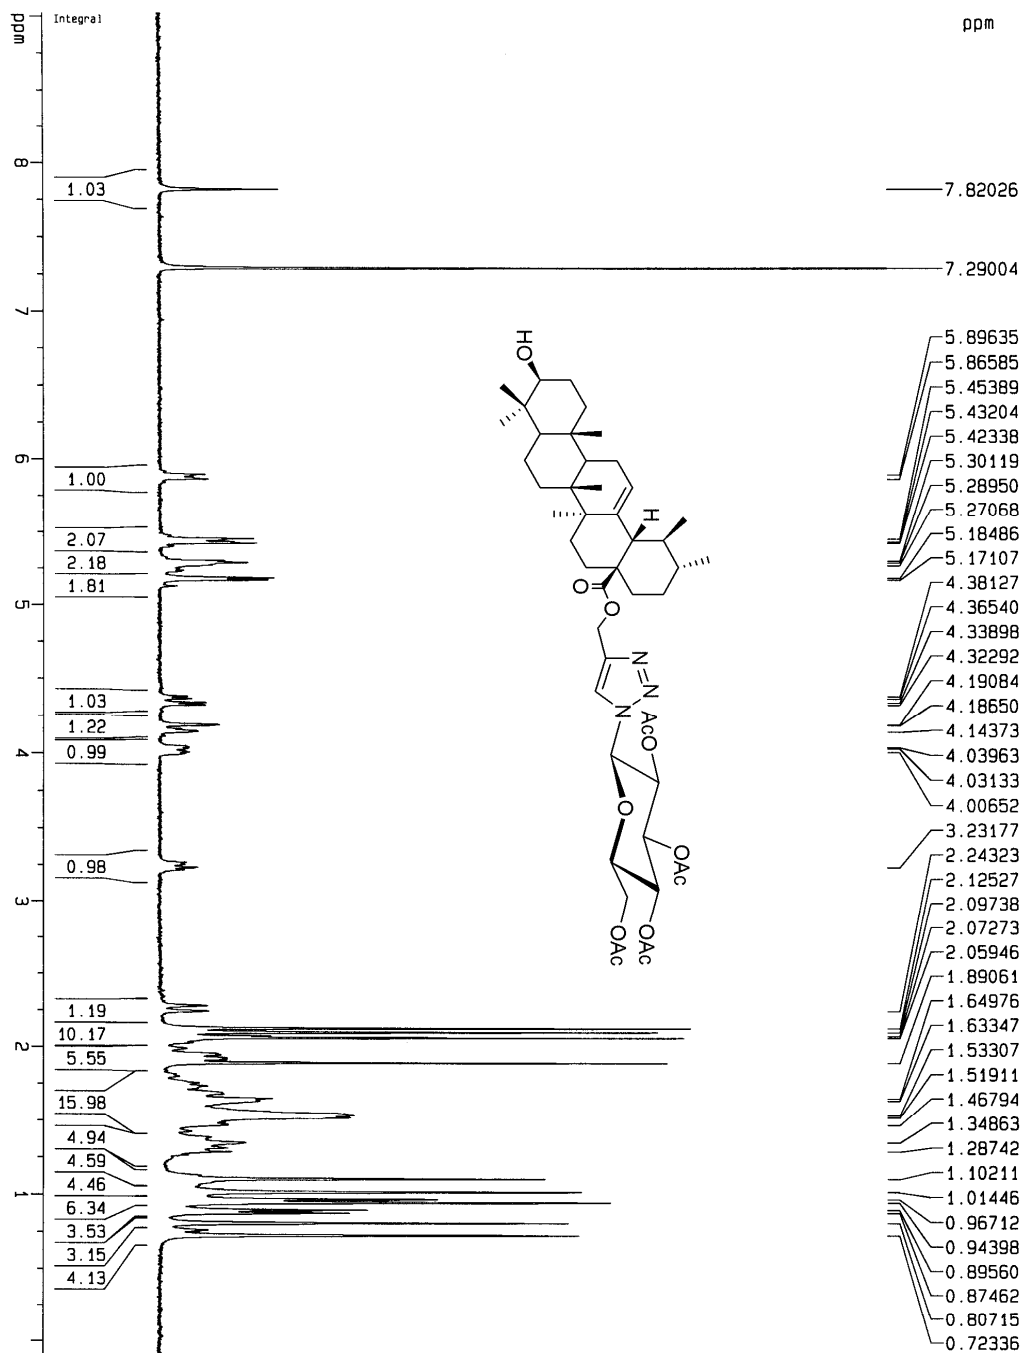

Current Data Parameters  
 NAME S10  
 EXRNO 779  
 PROCNO 1

F2 - Acquisition Parameters  
 Date\_ 20080408  
 Time 20:44  
 INSTRUM spect  
 PROBHD 5 mm QNP 1H/13  
 PULPROG zg30  
 TD 15242  
 SOLVENT CDCl3  
 NS 8  
 DS 0  
 SMH 4139.073 Hz  
 FIDRES 0.271557 Hz  
 AQ 1.8412835 sec  
 RG 1024  
 DM 120.800 usec  
 DE 6.00 usec  
 TE 298.0 K  
 D1 2.00000000 sec

\*\*\*\*\* CHANNEL f1 \*\*\*\*\*  
 NUC1 1H  
 P1 6.00 usec  
 PL1 -4.00 dB  
 SF01 300.131873 MHz

F2 - Processing parameters  
 S1 32768  
 SF 300.130036 MHz  
 WDW EM  
 SSB 0  
 LB 0.20 Hz  
 GB 0  
 PC 1.00

1D NMR plot parameters  
 CX 22.00 cm  
 CY 12.00 cm  
 F1P 9.021 ppm  
 F1 2707.56 Hz  
 F2P -0.102 ppm  
 F2 -30.52 Hz  
 PPMICH 0.41468 ppm/cm  
 HZICM 124.45818 Hz/cm



KELLY-145 13C-NMR CDCL3 300K AV-300

Current Data Parameters  
 NAME SIB  
 EXPNO 830  
 PROCNO 1

F2 - Acquisition Parameters  
 Date\_ 20080411  
 Time 19:56  
 INSTRUM spect  
 PROBRW 5 mm QNP 1H/13  
 PULPROG zgpg  
 TD 32768  
 SOLVENT CDCl3  
 NS 2895  
 DS 8  
 SMH 21097.047 Hz  
 FIDRES 0.643931 Hz  
 AQ 0.7766516 sec  
 RG 409600  
 DW 23.700 usec  
 DE 5.00 usec  
 TE 300.0 K  
 D1 2.0000000 sec  
 d11 0.0300000 sec

===== CHANNEL f1 =====  
 NUC1 13C  
 P1 8.00 usec  
 PL1 -2.00 dB  
 SF01 75.4763978 MHz

===== CHANNEL f2 =====  
 CPOPRG2 waltz16  
 NUC2 1H  
 PCPR2 60.00 usec  
 PL2 -4.00 dB  
 PL12 19.25 dB  
 SF02 300.1312005 MHz

F2 - Processing parameters  
 SI 32768  
 SF 75.4677488 MHz  
 MIDW EM  
 SSB 0  
 LB 1.00 Hz  
 GB 0  
 PC 1.00

10 NMR plot parameters  
 CX 22.00 cm  
 CY 15.00 cm  
 F1P 216.498 ppm  
 F1 16336.60 Hz  
 F2P -2.309 ppm  
 F2 -174.28 Hz  
 PPKCH 9.94577 ppm/cm  
 HZCH 750.58521 Hz/cm

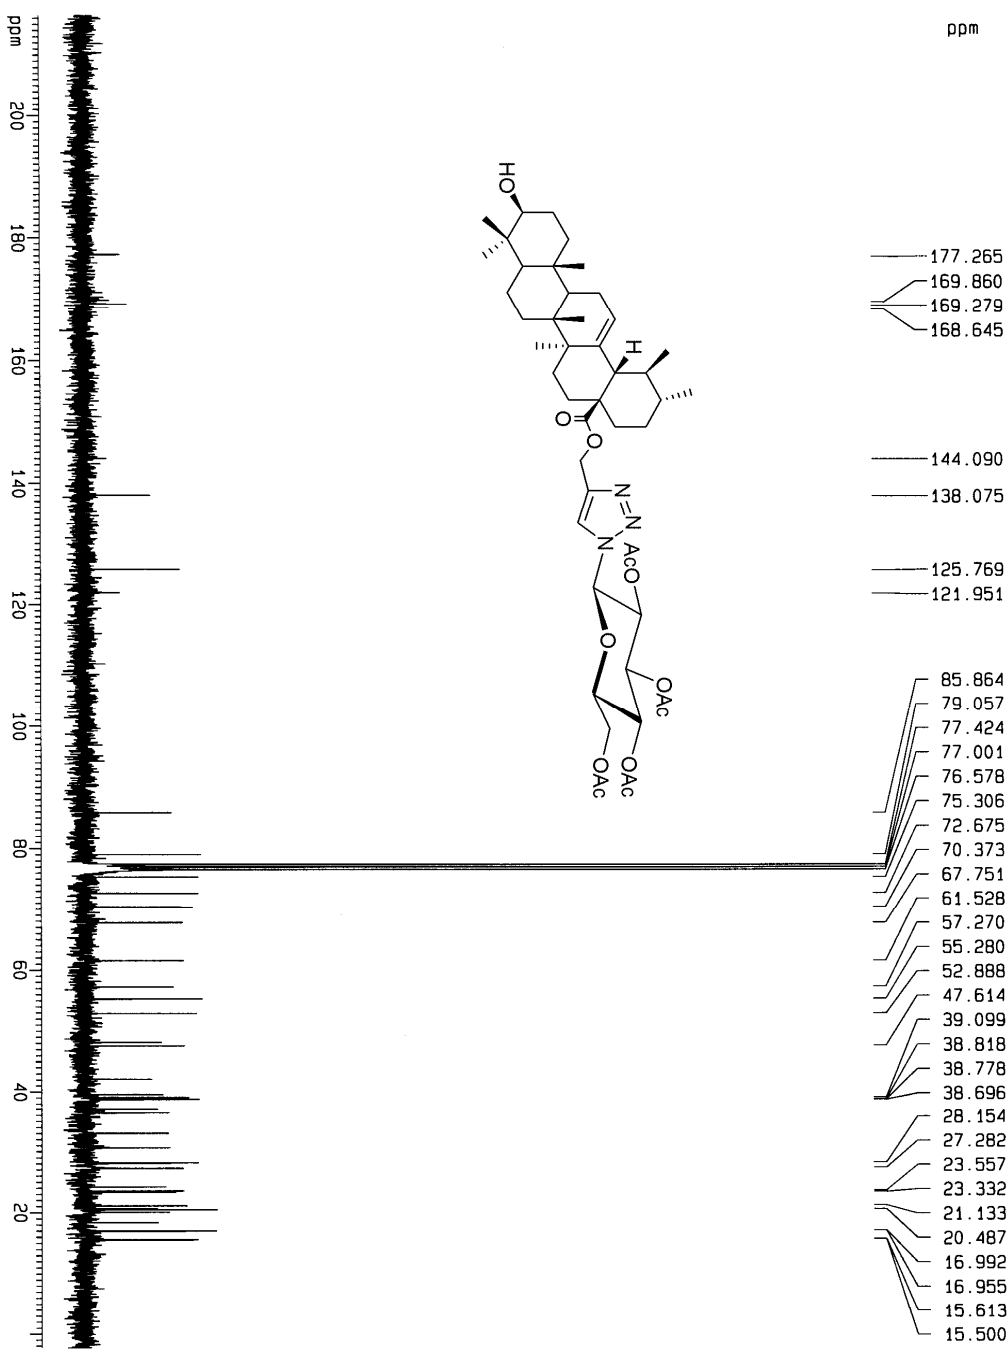

- 177.265
- 169.860
- 169.279
- 168.645
- 144.090
- 138.075
- 125.769
- 121.951
- 85.864
- 79.057
- 77.424
- 77.001
- 76.578
- 75.306
- 72.675
- 70.373
- 67.751
- 61.528
- 57.270
- 55.280
- 52.888
- 47.614
- 39.099
- 38.818
- 38.778
- 38.696
- 28.154
- 27.282
- 23.557
- 23.332
- 21.133
- 20.487
- 16.992
- 16.955
- 15.613
- 15.500

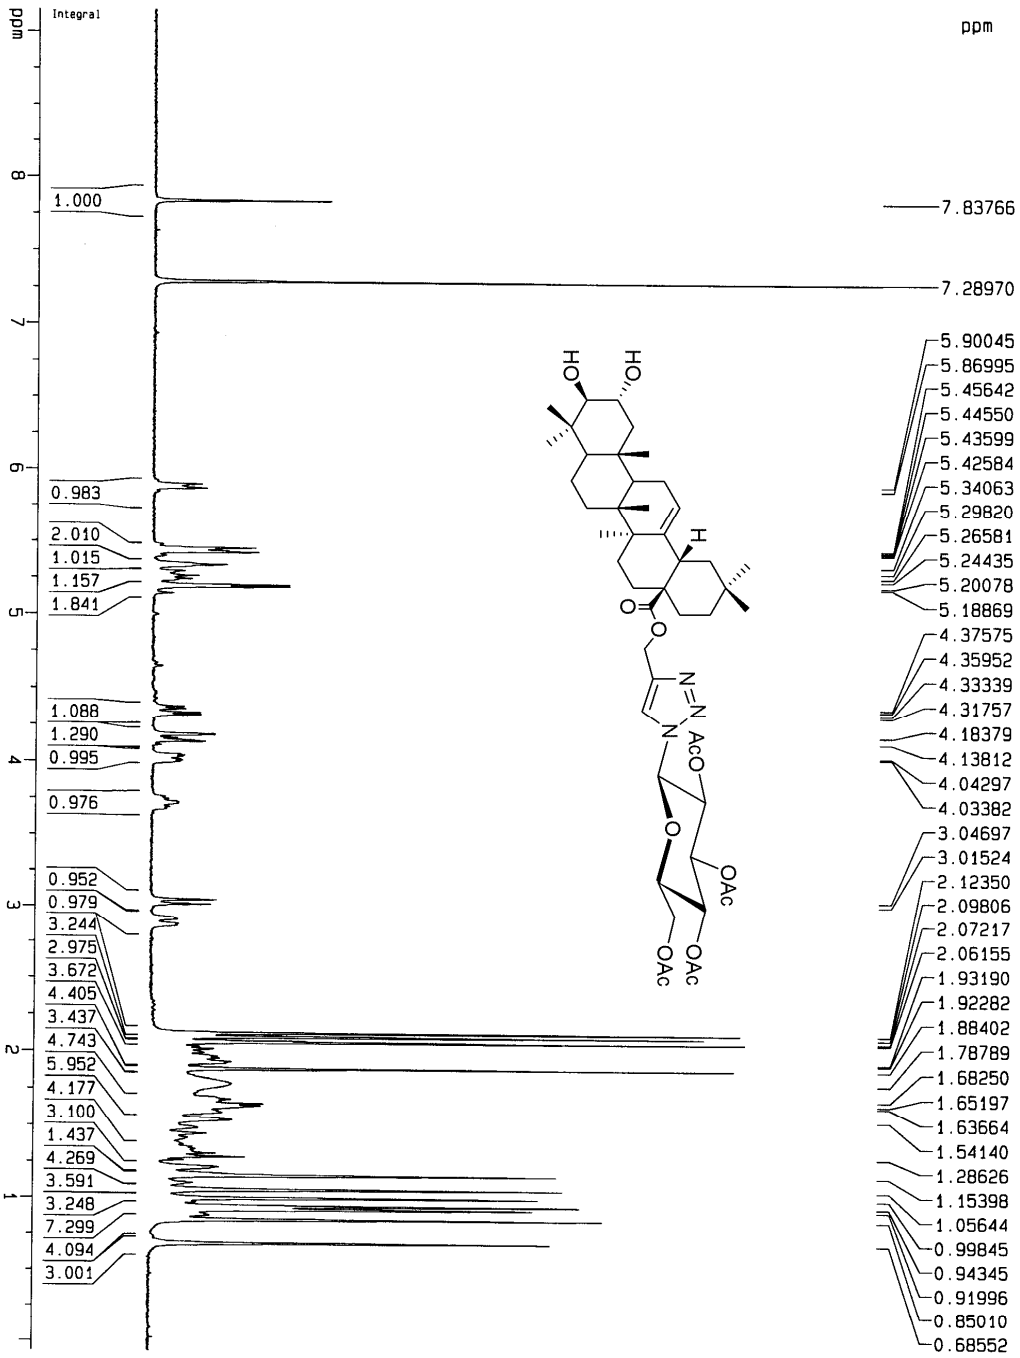

Current Data Parameters  
 NAME sht  
 EXPNO 778  
 PROCNO 1

F2 - Acquisition Parameters  
 Date\_ 20080408  
 Time 20:42  
 INSTRUM spect  
 PROBRD 5 mm QNP  
 PULPROG zgpg30  
 TD 65536  
 SOLVENT CDCl3  
 NS 16  
 DS 0  
 SMH 4139.073 Hz  
 FIDRES 0.271557 Hz  
 AQ 1.8412835 sec  
 RG 1024  
 DM 120.800 usec  
 DE 6.00 usec  
 TE 298.0 K  
 D1 2.00000000 sec

\*\*\*\*\* CHANNEL f1 \*\*\*\*\*  
 NUC1 1H  
 P1 5.00 usec  
 PL1 -4.00 dB  
 SF01 300.1317673 MHz

F2 - Processing parameters  
 SI 32768  
 SF 300.1300035 MHz  
 KDN EM  
 SSB 0  
 LB 0.20 Hz  
 GB 0  
 PC 1.00

1D NMR plot parameters  
 CX 22.00 cm  
 CT 12.00 cm  
 F1P 9.152 ppm  
 F1 2746.88 Hz  
 F2P -0.069 ppm  
 F2 -20.69 Hz  
 PPMCN 0.41915 ppm/cm  
 HZCN 125.79886 Hz/cm

KELLY-143 1H-NMR CDCL3 300K AV-300

Current Data Parameters  
 NAME sfb  
 EXPNO 827  
 PROCNO 1

F2 - Acquisition Parameters

Date\_ 20080411  
 Time 9.44  
 INSTRUM spect  
 PROBHD 5 mm QNP 1H/13  
 PULPROG zgpg  
 TD 32768  
 SOLVENT CDCl3  
 NS 1668  
 DS 8  
 SMH 21097.047 Hz  
 FIDRES 0.64831 Hz  
 AQ 0.776516 sec  
 RG 409600  
 DM 23.700 usec  
 DE 5.00 usec  
 TE 300.0 K  
 D1 2.00000000 sec  
 d11 0.03000000 sec

\*\*\*\*\* CHANNEL f1 \*\*\*\*\*

NUC1 13C  
 P1 8.00 usec  
 PL1 -2.00 dB  
 SF01 75.4753978 MHz

\*\*\*\*\* CHANNEL f2 \*\*\*\*\*

CPDPRG2 waltz16  
 NUC2 1H  
 PCPD2 80.00 usec  
 PL2 -4.00 dB  
 PL12 19.25 dB  
 SF02 300.1312005 MHz

F2 - Processing parameters

SI 32768  
 SF 75.4677310 MHz  
 WDW EM  
 SSB 0  
 LB 1.00 Hz  
 GB 0  
 PC 1.00

10 NMR plot parameters

CX 22.00 cm  
 CY 15.00 cm  
 F1P 222.938 dBm  
 F1 16824.64 Hz  
 F2P -6.972 dBm  
 F2 -526.20 Hz  
 PPMCK 10.45049 dBm/cm  
 HZCM 788.67462 Hz/cm

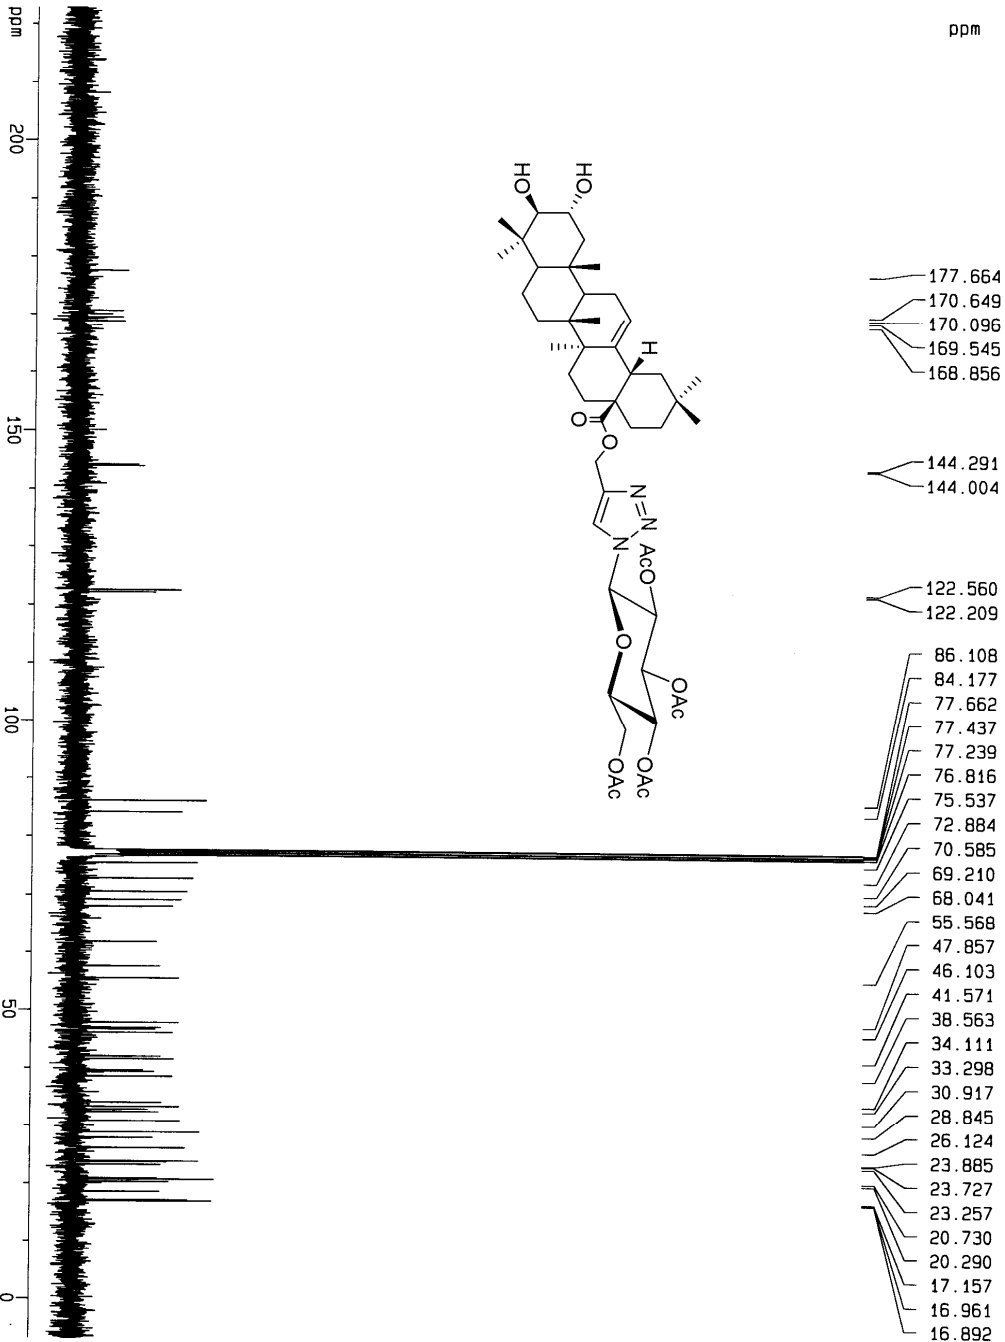

- 177.664
- 170.649
- 170.096
- 169.545
- 168.856
- 144.291
- 144.004
- 122.560
- 122.209
- 86.108
- 84.177
- 77.662
- 77.437
- 77.239
- 76.816
- 75.537
- 72.884
- 70.585
- 69.210
- 68.041
- 55.568
- 47.857
- 46.103
- 41.571
- 38.563
- 34.111
- 33.298
- 30.917
- 28.845
- 26.124
- 23.885
- 23.727
- 23.257
- 20.730
- 20.290
- 17.157
- 16.961
- 16.892

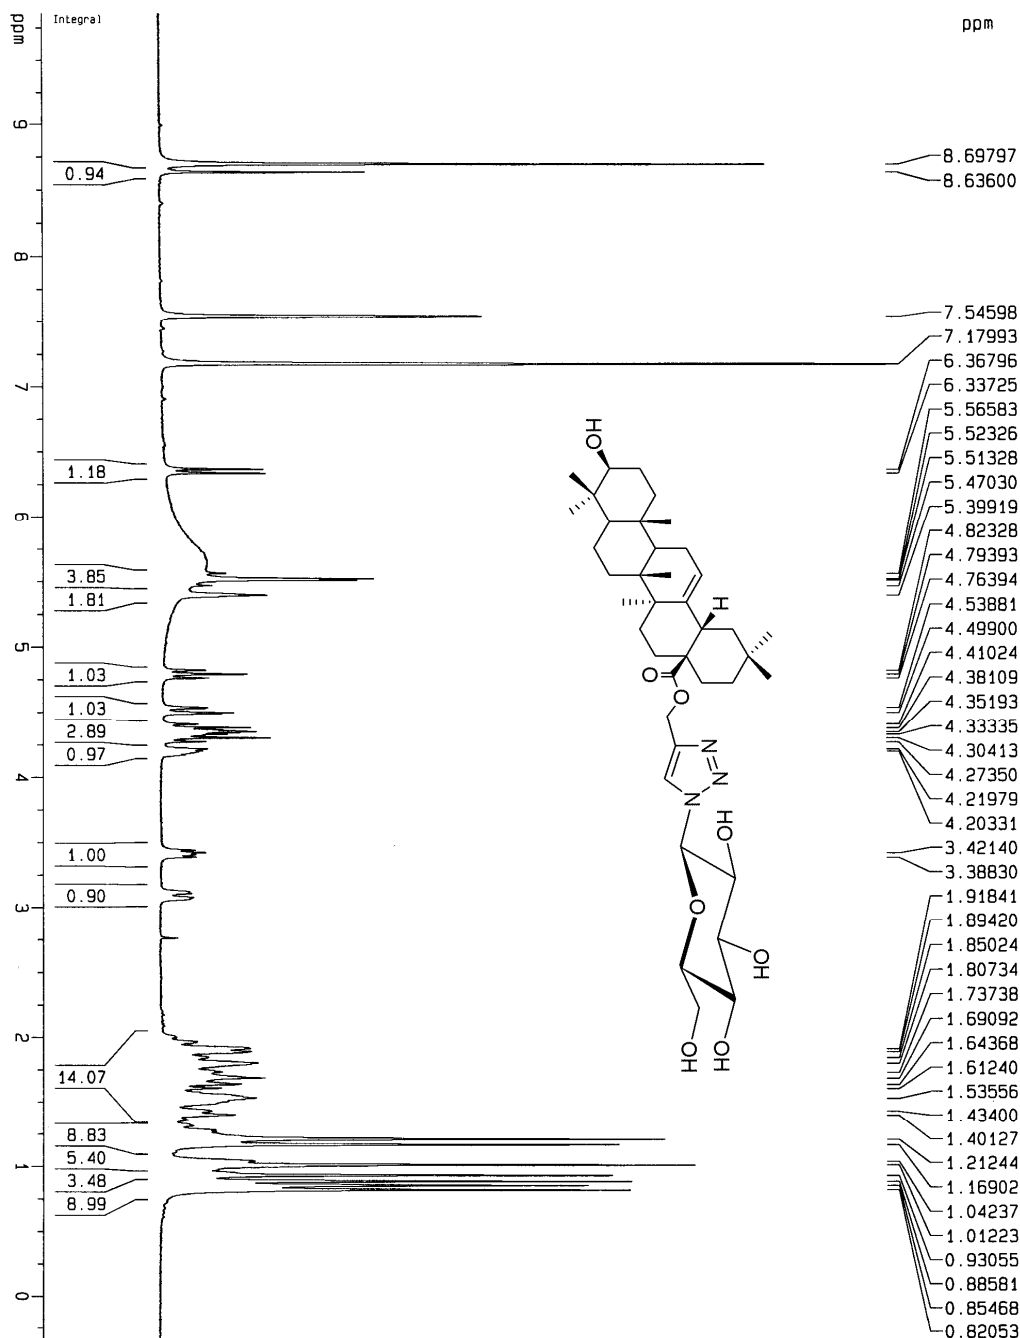

Current Data Parameters  
 NAME: 688  
 EXPNO: 688  
 PROCNO: 1

F2 - Acquisition Parameters  
 Date\_: 20080327  
 Time: 10.58  
 INSTRUM: spect  
 PROBO: 5 mm QNP 1H/13  
 PULPROG: zg30  
 TD: 13512  
 SOLVENT: Pyr  
 NS: 19  
 DS: 0  
 SWH: 3378.378 Hz  
 FIDRES: 0.250028 Hz  
 AQ: 1.9998260 sec  
 RG: 287.4  
 DW: 148.000 usec  
 DE: 6.00 usec  
 TE: 298.0 K  
 D1: 2.00000000 sec

\*\*\*\*\* CHANNEL f1 \*\*\*\*\*  
 NUC1: 1H  
 P1: 6.00 usec  
 PL1: -4.00 dB  
 SF01: 300.1315042 MHz

F2 - Processing parameters  
 S1: 32768  
 SF: 300.1299948 MHz  
 MDW: EM  
 SSB: 0  
 LB: 0.10 Hz  
 GB: 0  
 PC: 1.00

1D NMR plot parameters  
 CX: 22.00 cm  
 CY: 12.00 cm  
 F1p: 9.862 ppm  
 F1: 2959.86 Hz  
 F2p: -0.374 ppm  
 F2: -112.12 Hz  
 PPMCM: 0.46525 ppm/cm  
 HZCM: 139.63530 Hz/cm

KELLY-142 13C-NMR PYR-05 300K AV-300

Current Data Parameters  
 NAME srb  
 EXPNO 694  
 PROCNO 1

F2 - Acquisition Parameters  
 Date\_ 20080328  
 Time 11:01  
 INSTRUM spect  
 PROBHD 5 mm QNP 1H/13  
 PULPROG zgpg  
 TD 32768  
 SOLVENT Pyr  
 NS 1088  
 DS 8  
 SM 18115.941 Hz  
 FIDRES 0.552895 Hz  
 AQ 0.5044468 sec  
 RG 409600  
 DM 27.600 usec  
 DE 6.00 usec  
 TE 300.0 K  
 D1 2.0000000 sec  
 d11 0.0300000 sec

==== CHANNEL f1 =====  
 NUC1 13C  
 P1 8.00 usec  
 PL1 -2.00 dB  
 SF01 75.475978 MHz

==== CHANNEL f2 =====  
 CPDPRG2 waltz16  
 NUC2 1H  
 PCPD2 80.00 usec  
 PL2 -4.00 dB  
 PL12 19.25 dB  
 SF02 300.132005 MHz

F2 - Processing parameters  
 SI 32768  
 SF 75.467277 MHz  
 MDW FM  
 SSB 0  
 LB 1.00 Hz  
 GB 0  
 PC 1.00

1D NMR plot parameters  
 CX 22.50 cm  
 CY 20.00 cm  
 F1P 202.677 ppm  
 F1 15295.35 Hz  
 F2P -1.464 ppm  
 F2 -10.47 Hz  
 PPMCM 9.07291 ppm/cm  
 HZCM 664.71504 Hz/cm

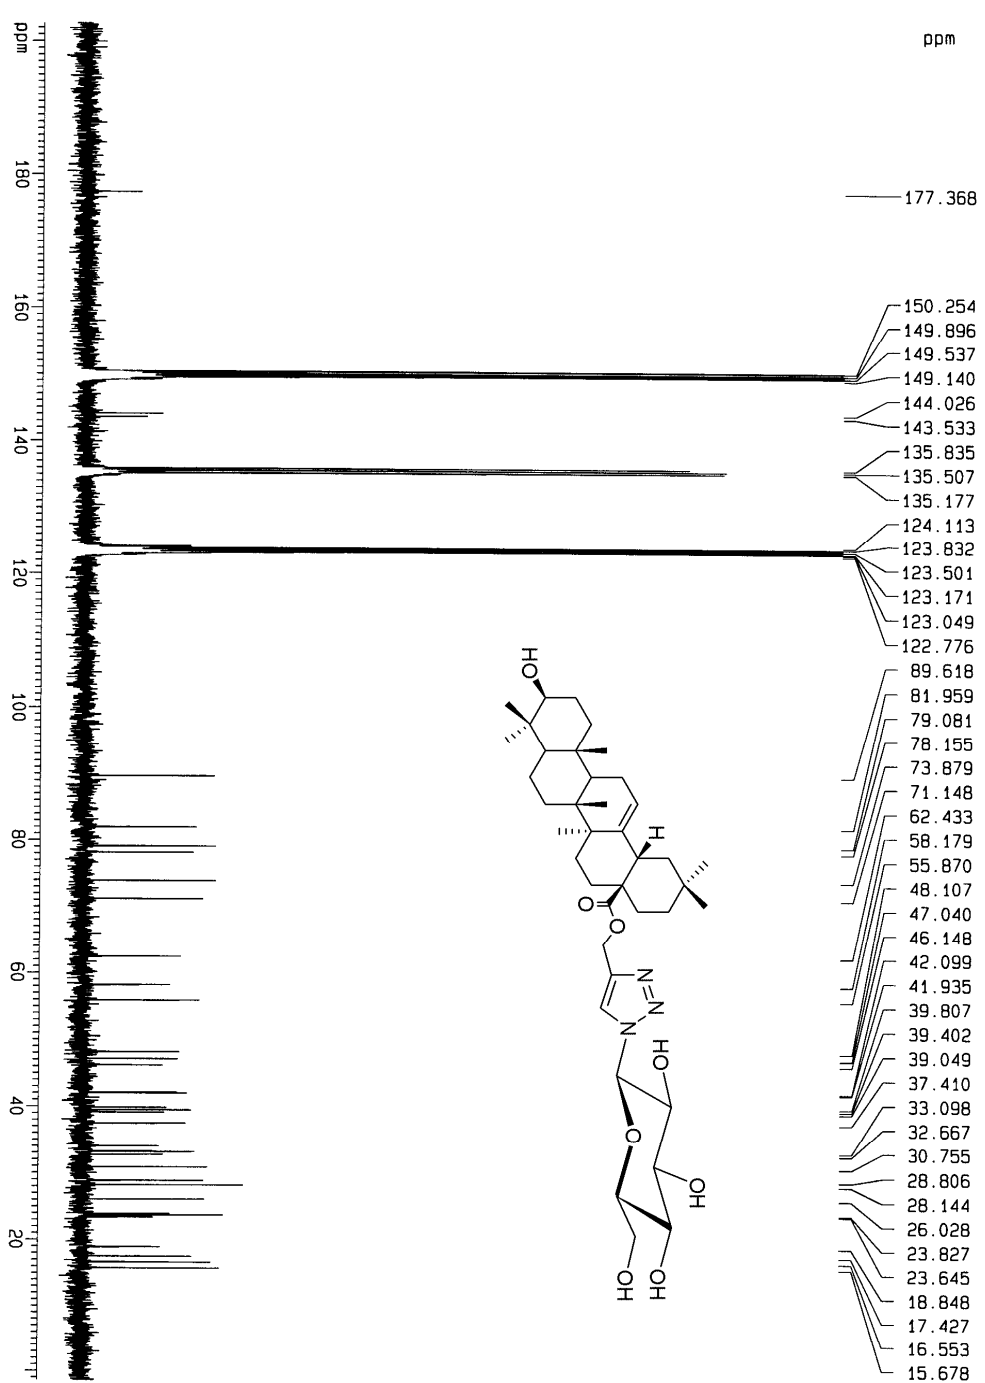

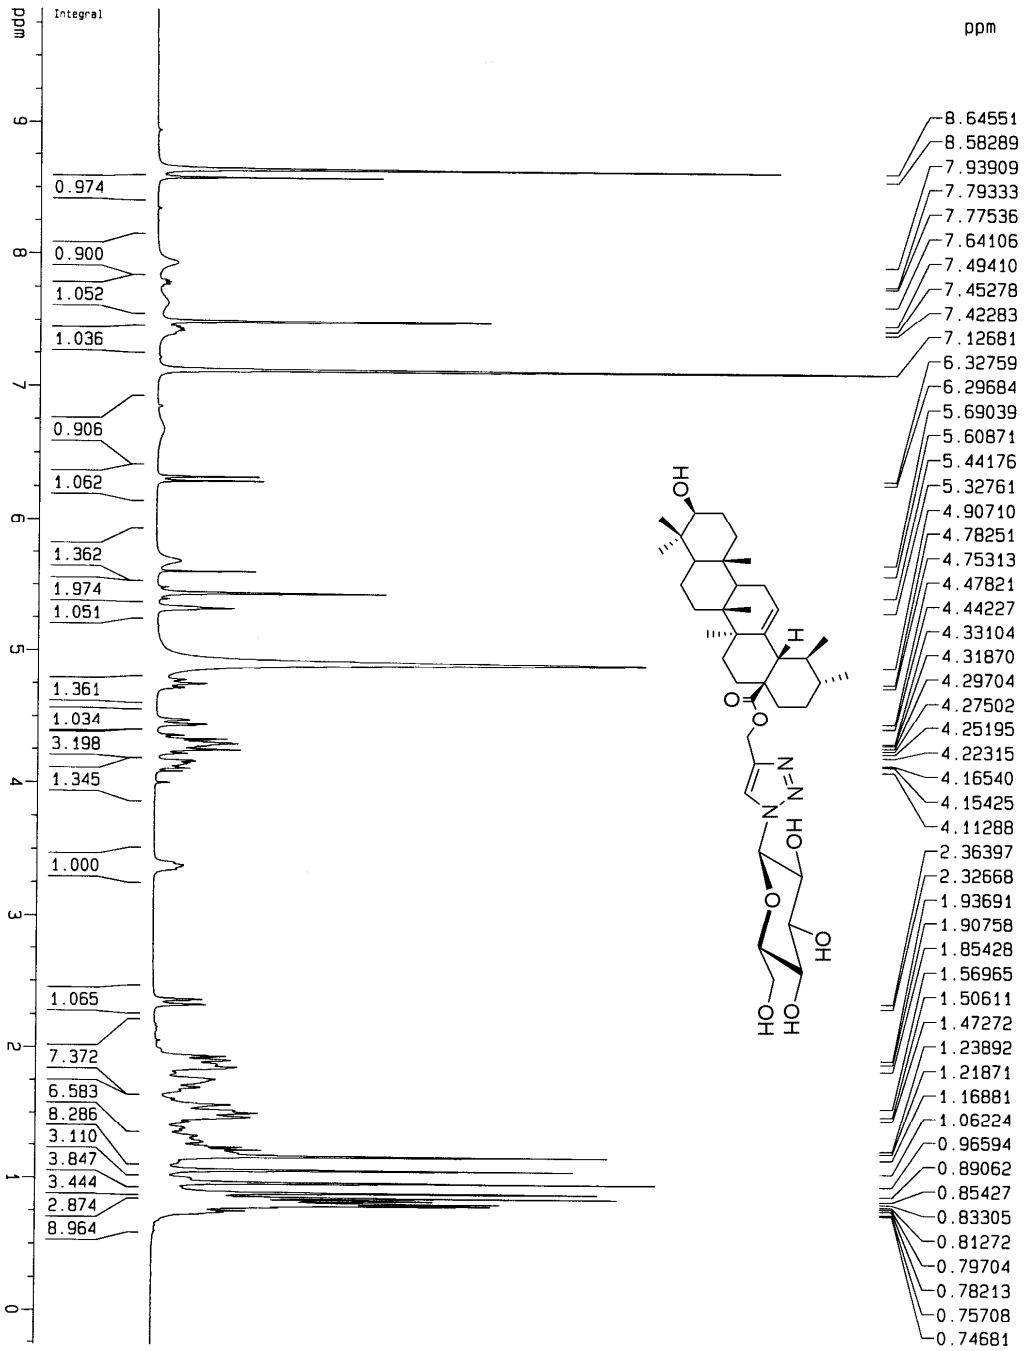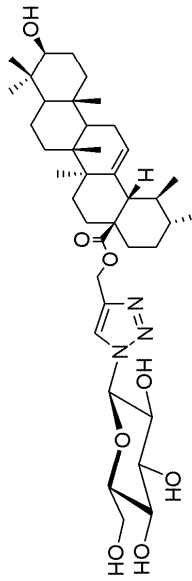

Current Data Parameters  
 NAME: shp  
 EXPNO: 836  
 PROCNO: 1

F2 - Acquisition Parameters  
 Date\_: 20080414  
 Time: 12.48  
 INSTNM: spect  
 PROBNM: 5 mm QNP 1H/13  
 PULPROG: zg30  
 TD: 11414  
 SOLVENT: Pyr  
 NS: 32  
 DS: 0  
 SH1: 3910.976 Hz  
 FIDRES: 0.33866 Hz  
 AQ: 1.4975668 sec  
 RG: 322.5  
 DM: 131.200 usec  
 DE: 6.00 usec  
 TE: 298.0 K  
 D1: 2.0000000 sec

===== CHANNEL f1 =====  
 NUC1: 1H  
 P1: 6.00 usec  
 PL1: -4.00 dB  
 SF01: 300.1316115 MHz

F2 - Processing parameters  
 SI: 32768  
 SF: 300.1300107 MHz  
 WDW: EM  
 SSB: 0  
 LB: 0.50 Hz  
 GB: 0  
 PC: 1.00

1D NMR plot parameters  
 CX: 22.00 cm  
 CY: 12.00 cm  
 F1P: 9.658 ppm  
 F1: 2956.54 Hz  
 F2P: -0.264 ppm  
 F2: -79.19 Hz  
 PPMICH: 0.46006 ppm/cm  
 HZCM: 138.07883 Hz/cm

Kelly-149 C13-NMR CSDJN 300K AV-300

Current Data Parameters  
 NAME snb  
 EXPNO 856  
 PROCNO 1

F2 - Acquisition Parameters

Date\_ 20080416  
 Time 18.18  
 INSTRUM spect  
 PROBDW 5 mm QNP 1H/13  
 PULPROG zgpg  
 TD 32768  
 SOLVENT Pyv  
 NS 2609  
 DS 8  
 SMH 18115.941 Hz  
 FIDRES 0.552855 Hz  
 AQ 0.9044468 sec  
 RG 102400  
 DM 27.600 usec  
 DE 6.00 usec  
 TE 300.0 K  
 D1 2.0000000 sec  
 d11 0.0300000 sec

===== CHANNEL f1 =====  
 NUC1 13C  
 P1 8.00 usec  
 PL1 -2.00 dB  
 SF01 75.4763978 MHz

===== CHANNEL f2 =====  
 CPDPRG2 waltz16  
 NUC2 1H  
 POP02 80.00 usec  
 PL2 -4.00 dB  
 PL12 19.28 dB  
 SF02 300.1312005 MHz

F2 - Processing parameters

SF 32768  
 SF 75.4677277 MHz  
 MDW EM  
 SSB 0  
 LB 1.00 Hz  
 GB 0  
 PC 1.00

10 NMR plot parameters

CX 22.50 cm  
 CY 30.00 cm  
 F1P 280.000 ppm  
 F1 17357.58 Hz  
 F2 0.000 ppm  
 F2 0.00 Hz  
 PPKCM 10.22222 ppm/cm  
 HZCM 771.44788 Hz/cm

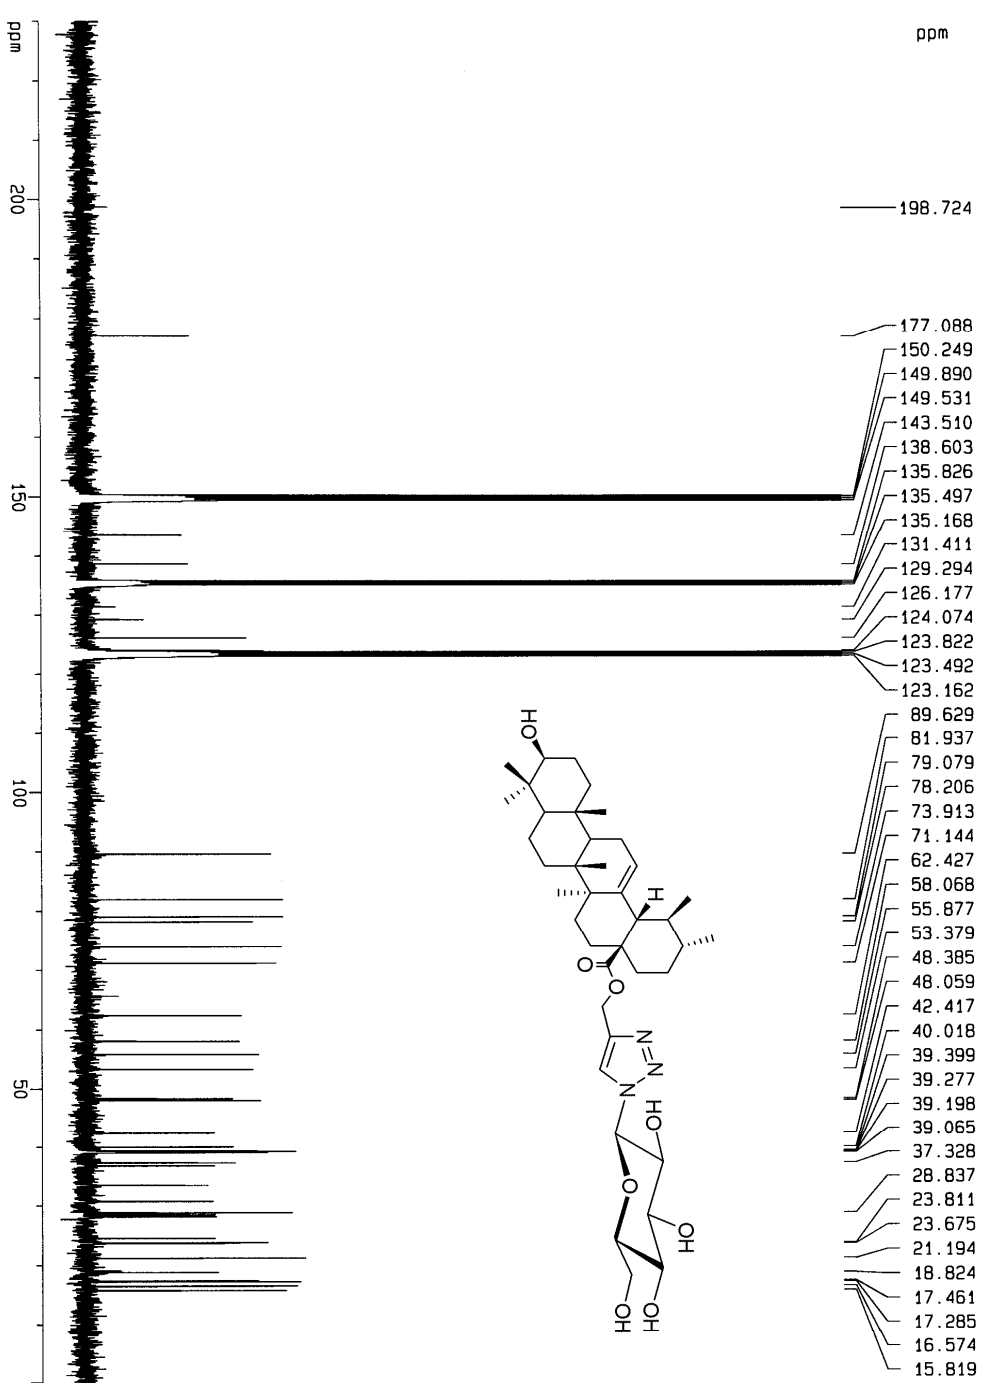

snb

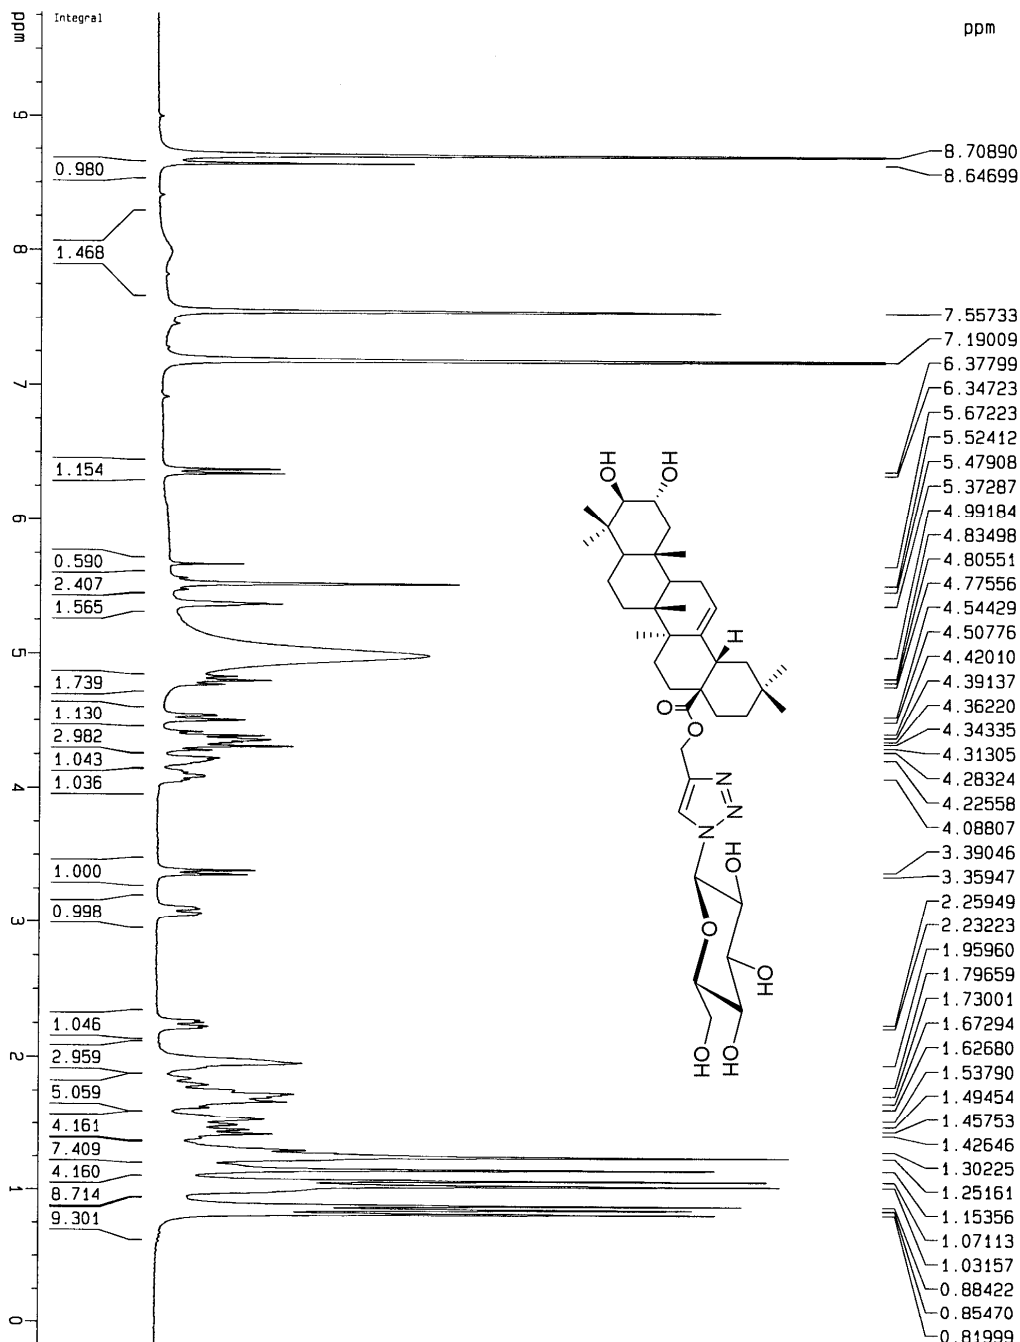

Current Data Parameters  
 NAME shb  
 EXPNO 835  
 PROCNO 1

F2 - Acquisition Parameters  
 Date\_ 20080414  
 Time 12.43  
 INSTRUM spect  
 PROBHD 5 mm QNP 1H/13  
 PULPROG zg30  
 TO 14.14  
 SOLVENT Pyr  
 NS 32  
 DS 0  
 SHF 370.238 Hz  
 FIDRES 0.325936 Hz  
 AQ 1.5340916 sec  
 RG 322.5  
 DM 134.400 usec  
 DE 5.00 usec  
 TE 298.0 K  
 D1 2.0000000 sec

\*\*\*\*\* CHANNEL f1 \*\*\*\*\*  
 NUC1 1H  
 P1 6.00 usec  
 PL1 -4.00 dB  
 SFO1 300.1315716 MHz

F2 - Processing parameters  
 SI 32768  
 SF 300.1299916 MHz  
 MDW EM  
 SSB 0  
 LB 0.50 Hz  
 GB 0  
 PC 1.00

1D NMR Plot Parameters  
 CX 22.00 cm  
 CY 20.00 cm  
 F1P 9.771 ppm  
 F1 2932.46 Hz  
 F2P -0.170 ppm  
 F2 -50.92 Hz  
 PPMKCM 0.45183 ppm/cm  
 HZCM 135.60815 Hz/cm



KELLY-148 C13-NMR CSDEN 300K AV-300

Current Data Parameters  
 NAME SNO  
 EXPRNO 855  
 PROCNO 1

ppm

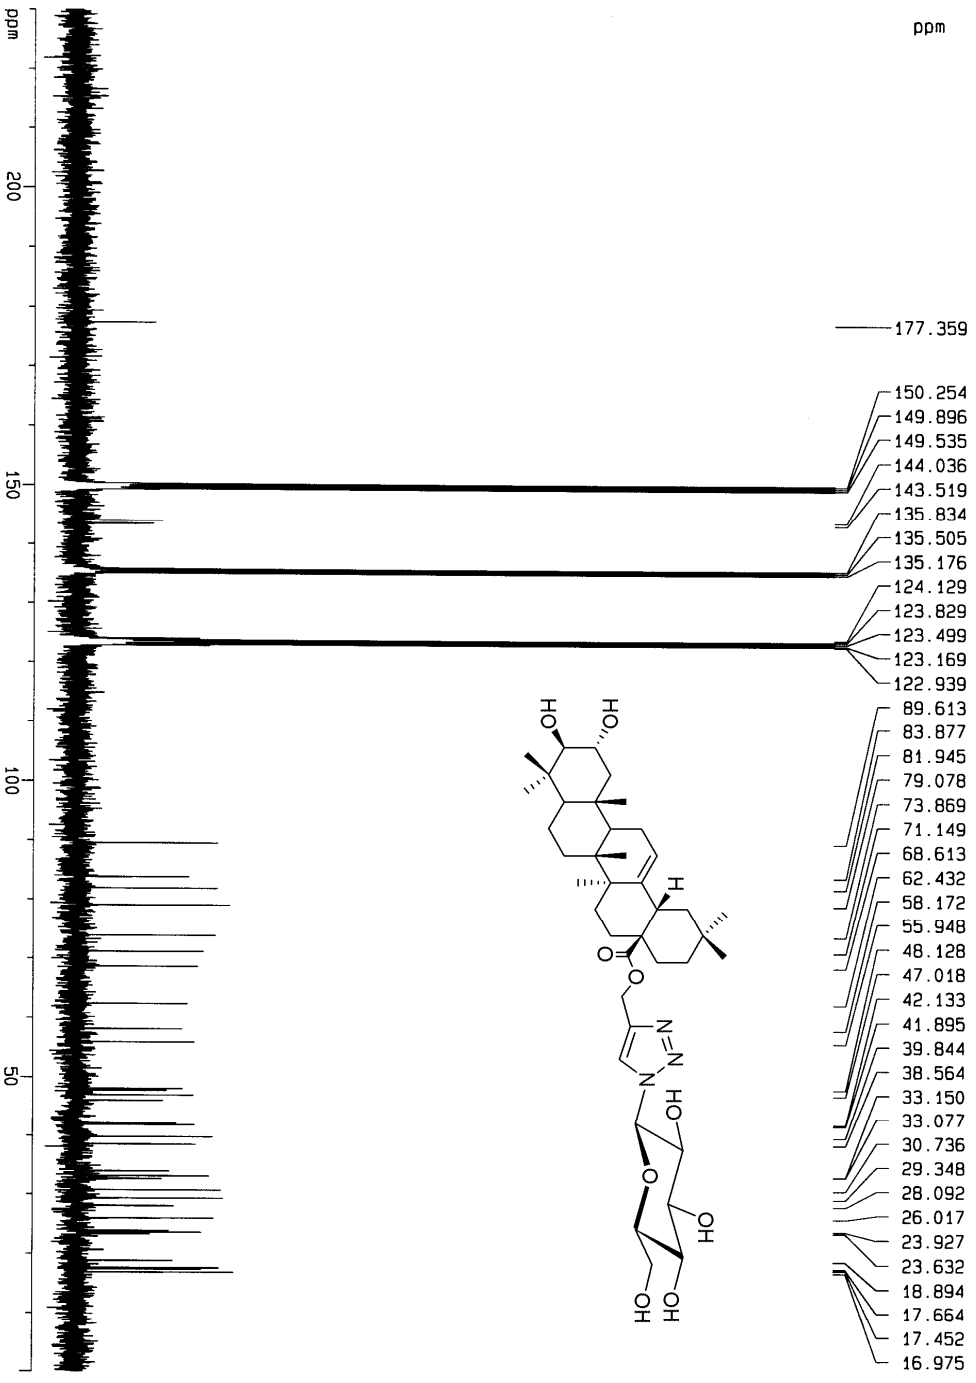

F2 - Acquisition Parameters  
 Date\_ 20080415  
 Time 16.55  
 INSTRUM spect  
 PROBD 5 mm QNP 1H/13  
 PULPROG zgpg  
 TD 32768  
 SOLVENT Pyr  
 NS 1384  
 DS 8  
 SM1 18115.941 Hz  
 FIDRES 0.352855 Hz  
 AQ 0.3044458 sec  
 RG 102400  
 DW 27.500 usec  
 DE 6.00 usec  
 TE 300.0 K  
 D1 2.00000000 sec  
 D11 0.03000000 sec

\*\*\*\*\* CHANNEL f1 \*\*\*\*\*  
 NUC1 13C  
 P1 8.00 usec  
 PL1 -2.00 dB  
 SF01 75.4763978 MHz

\*\*\*\*\* CHANNEL f2 \*\*\*\*\*  
 CPDPRG2 waltz16  
 NUC2 1H  
 PCPD2 80.00 usec  
 PL2 -4.00 dB  
 PL12 19.25 dB  
 SF02 300.1312005 MHz

F2 - Processing parameters  
 SI 32768  
 SF 75.467277 MHz  
 MDW EM  
 SSB 0  
 LB 1.00 Hz  
 GB 0  
 PC 1.00

sub

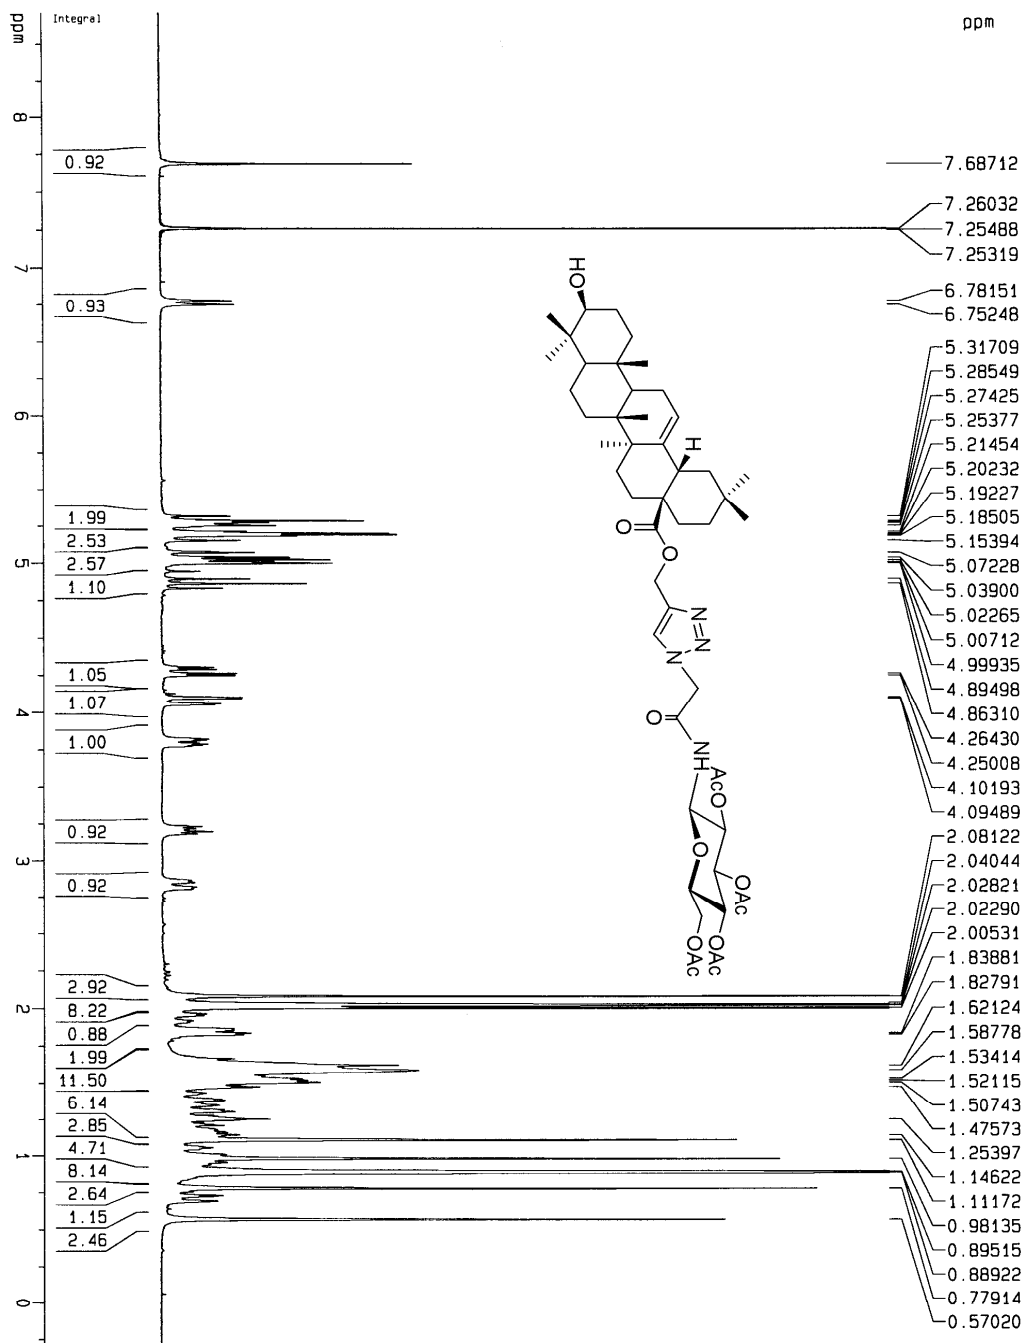

```

Current Data Parameters
NAME          shb
EXPNO        816
PROCNO       1
F2 - Acquisition Parameters
Date_        20080410
Time         11.10
INSTRUM     spect
PROBHD      5 mm QNP 1H/13
PULPROG     zg30
TD           12820
SOLVENT     CDCl3
NS           40
DS           0
SH1         3205.128 Hz
FIDRES      0.250010 Hz
AQ          1.9999700 sec
RG           362
DM          156.000 usec
DE           5.00 usec
TE           298.0 K
D1           2.00000000 sec
===== CHANNEL f1 =====
NUC1         1H
P1           6.00 usec
PL1          -4.00 dB
SFO1         300.1313889 MHz
F2 - Processing parameters
SI           32768
SF           300.1300121 MHz
MVM          EM
SSB          0
LB           0.10 Hz
GB           0
PC           1.00
1D NMR plot parameters
CX           22.00 cm
CY           20.00 cm
F1P         8.712 ppm
F1          2614.84 Hz
F2P         -0.295 ppm
F2          -88.55 Hz
PPKCM       0.40543 ppm/cm
HZCM        122.88142 Hz/cm
  
```

Kelly-146 13C-NMR CDCL3 300K AV-300

Current Data Parameters  
 NAME snb  
 EXPNO 841

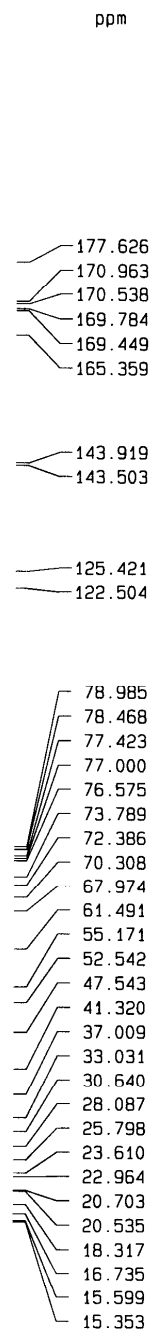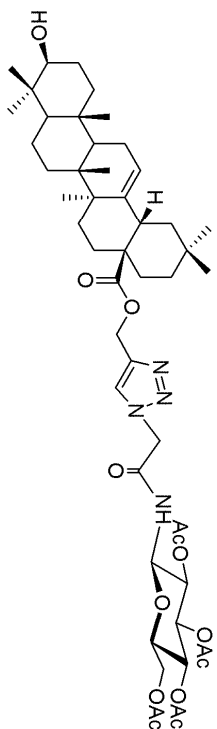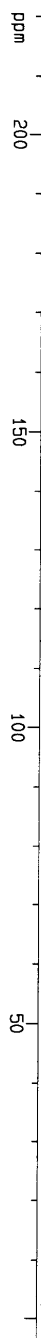

```

F2 - Acquisition Parameters
Date_      20080414
Time       15.49
INSTRUM    spect
PROBHD     5 mm QNP 1H/13
PULPROG    zgpgc
TD         32768
SOLVENT    CDCl3
NS         1216
DS         8
SMH        21097.047 Hz
FIDRES     0.648931 Hz
AQ         0.7769316 sec
RG         102400
DM         23.700 usec
DE         6.00 usec
TE         300.0 K
D1         2.00000000 sec
d11        0.03000000 sec

===== CHANNEL f1 =====
NUC1       13C
P1         8.00 usec
PL1       -2.00 dB
SFO1       75.4763978 MHz

===== CHANNEL f2 =====
CPDPRG2    waltz16
NUC2       1H
PCPD2      80.00 usec
PL2        -4.00 dB
SFO2       300.1312005 MHz

F2 - Processing parameters
SI         32768
SF         75.4677520 MHz
WDW        EM
SSB        0
LB         1.00 Hz
GB         0
PC         1.00

1D NMR plot parameters
CX         22.00 cm
CY         12.00 cm
F1P        220.682 DPM
F1         16654.39 Hz
F2P        -3.576 DPM
F2         -289.89 Hz
PPMCH      10.19357 DPM/cm
HZCM       759.28577 HZ/cm
  
```

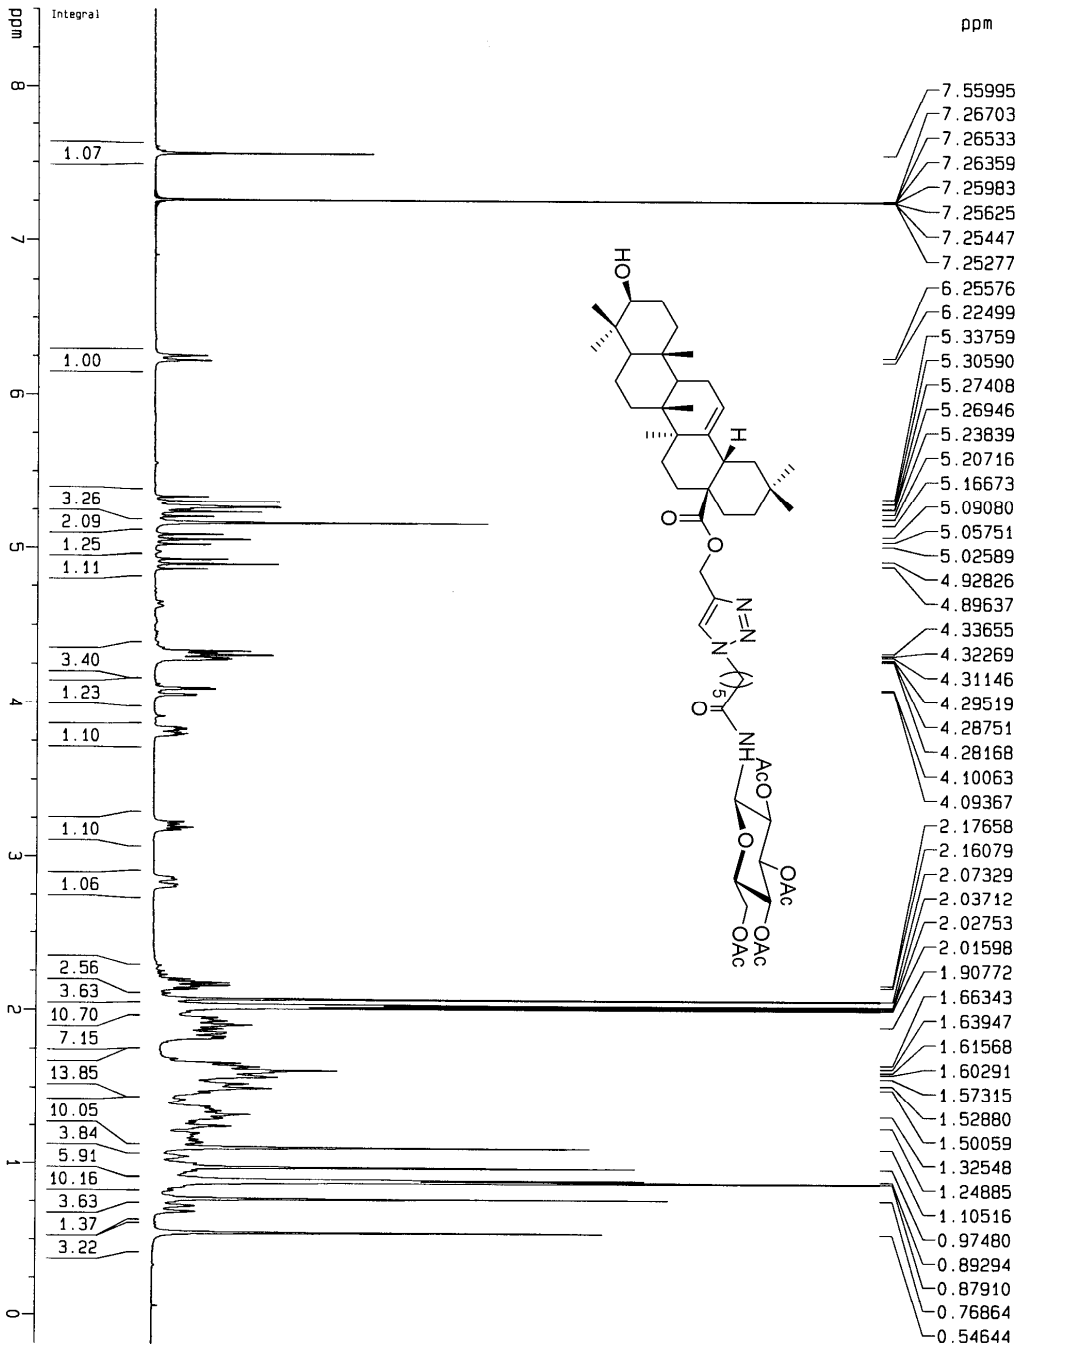

Current Data Parameters  
 NAME shb  
 EXPNO 817  
 PROCNO 1  
 F2 - Acquisition Parameters  
 Date\_ 20080410  
 Time 11:14  
 INSTRUM spect  
 PROBNM 5 mm QNP 1H/13  
 PULPROG zg30  
 TO 13020  
 SOLVENT CDCl3  
 NS 33  
 DS 0  
 SMH 3255.208 Hz  
 FIDRES 0.250016 Hz  
 AQ 1.999220 sec  
 RB 362  
 DM 153.600 usec  
 DE 6.00 usec  
 TE 298.0 K  
 D1 2.00000000 sec

\*\*\*\*\* CHANNEL f1 \*\*\*\*\*  
 NUC1 1H  
 P1 6.00 usec  
 PL1 -4.00 dB  
 SFO1 300.1314580 MHz  
 F2 - Processing parameters  
 SI 32768  
 SF 300.1300125 MHz  
 MDW EM  
 SSB 0  
 LB 0.10 Hz  
 GB 0  
 PC 1.00

1D NMR plot parameters  
 CX 22.00 cm  
 CY 15.00 cm  
 F1P 8.503 ppm  
 F1 2552.03 Hz  
 F2P -0.189 ppm  
 F2 -56.70 Hz  
 PPHCKM 0.35509 ppm/cm  
 HZCM 118.57864 Hz/cm

Ke11y-147 13C-NMR CDCL3 300K AV-300

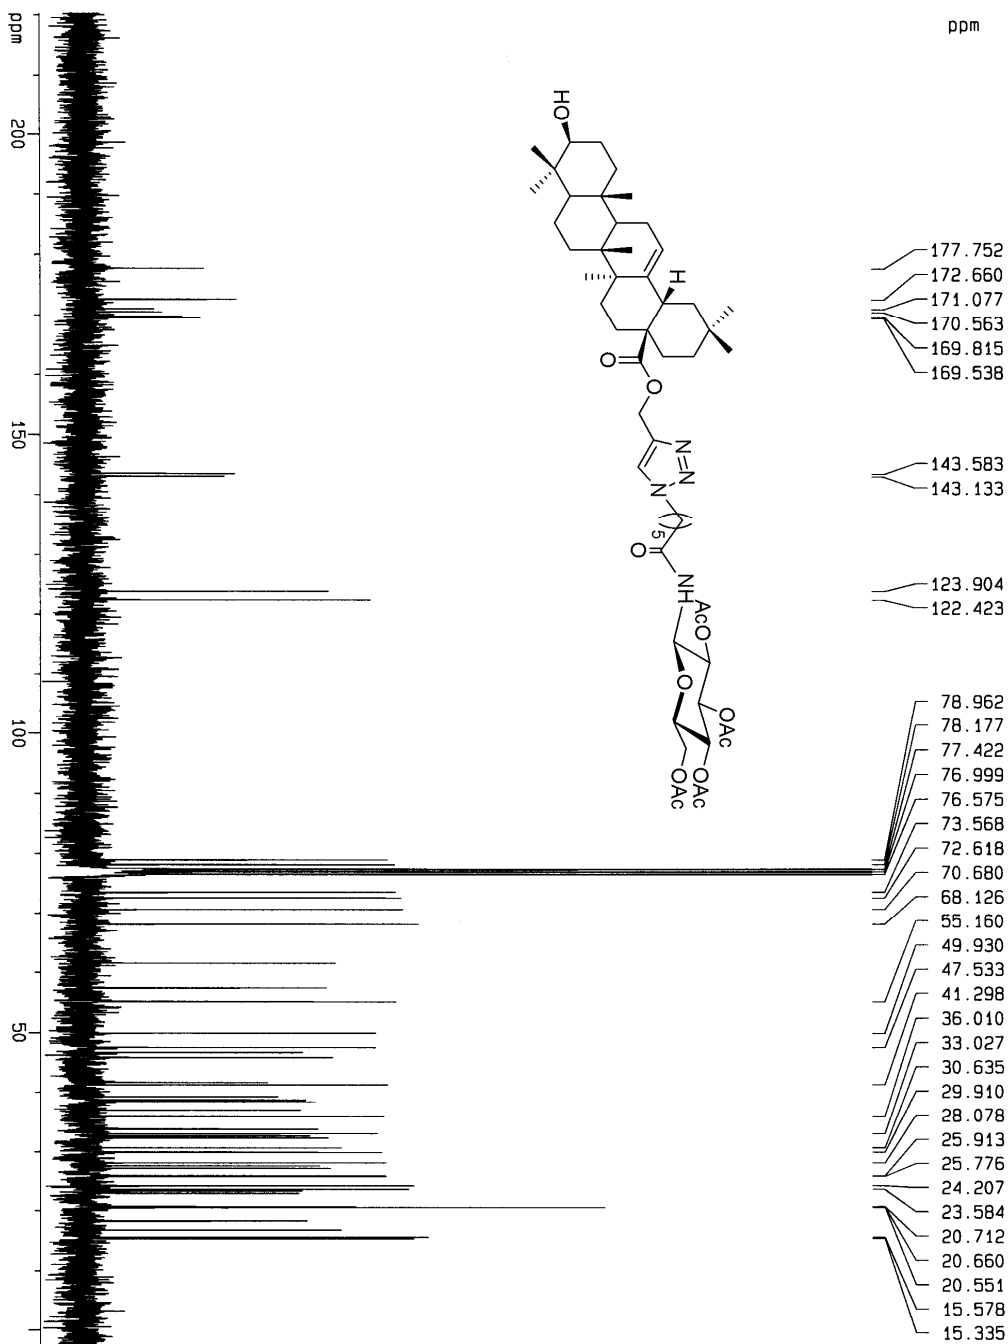

- 177.752
- 172.660
- 171.077
- 170.563
- 169.815
- 169.538
- 143.583
- 143.133
- 123.904
- 122.423
- 78.962
- 78.177
- 77.422
- 76.999
- 76.575
- 73.568
- 72.618
- 70.680
- 68.126
- 55.160
- 49.930
- 47.533
- 41.298
- 36.010
- 33.027
- 30.635
- 29.910
- 28.078
- 25.913
- 25.776
- 24.207
- 23.584
- 20.712
- 20.660
- 20.551
- 15.578
- 15.335

Current Data Parameters  
 NAME shb  
 EXPNO 842  
 PROCNO 1

F2 - Acquisition Parameters  
 Date\_ 20080414  
 Time 16.54  
 INSTRUM spect  
 PROBHD 5 mm QNP 1H/13  
 PULPROG zgpg  
 TD 32768  
 SOLVENT CDCl3  
 NS 1531  
 DS 8  
 SMH 21097.047 Hz  
 FIDRES 0.643931 Hz  
 AQ 0.776516 sec  
 RG 102400  
 DM 23.700 usec  
 DE 6.00 usec  
 TE 300.0 K  
 D1 2.00000000 sec  
 d11 0.03000000 sec

\*\*\*\*\* CHANNEL f1 \*\*\*\*\*  
 NUCl1 13C  
 P1 8.00 usec  
 PL1 -2.00 dB  
 SF01 75.4763978 MHz

\*\*\*\*\* CHANNEL f2 \*\*\*\*\*  
 CPDPRG2 waltz16  
 NUCl2 1H  
 P2 80.00 usec  
 PL2 -4.00 dB  
 PL12 19.25 dB  
 SF02 300.1312005 MHz

F2 - Processing parameters  
 SI 32768  
 SF 75.4677520 MHz  
 EQ EM  
 MDM 0  
 SSB 0  
 LB 1.00 Hz  
 GB 0  
 PC 1.00

1D NMR plot parameters  
 CK 22.00 cm  
 CY 20.00 cm  
 F1P 220.339 ppm  
 F1 16628.47 Hz  
 F2P -2.546 ppm  
 F2 -192.15 Hz  
 PPMCM 10.13113 ppm/cm  
 MZCM 764.57349 Hz/cm

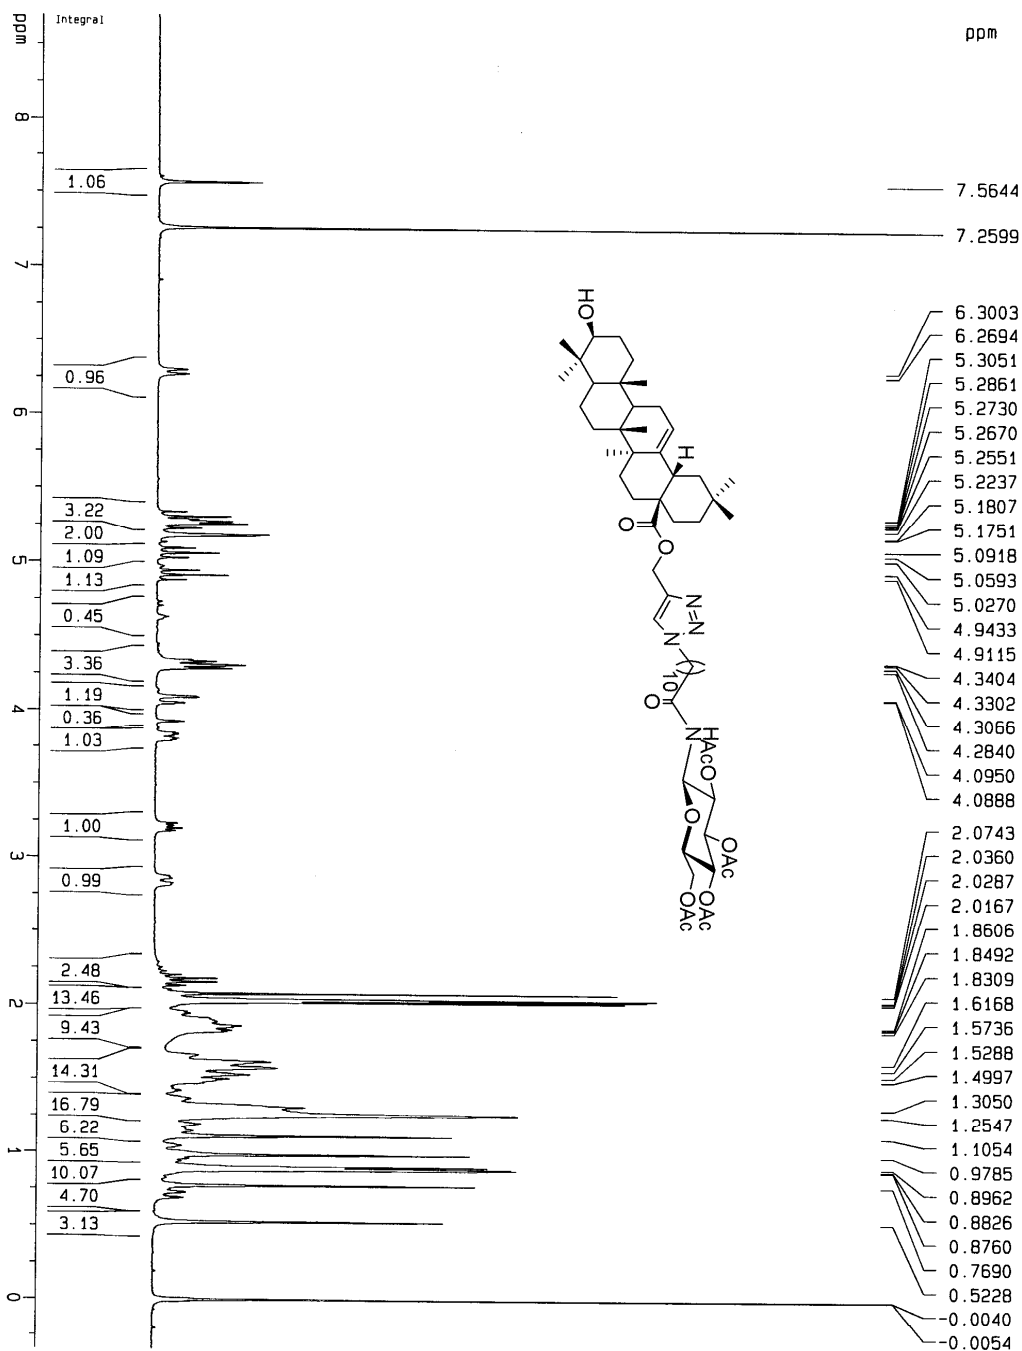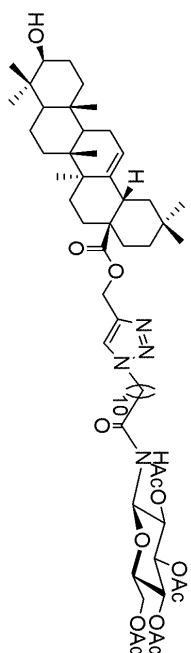

Current Data Parameters

NAME shb

EXPNO 837

PROCNO 1

F2 - Acquisition Parameters

Date\_ 20080414

Time 15.36

INSTRUM spect

PROBHD 5 mm QNP 1H/13

PULPROG zg30

TD 13414

SOLVENT CDCl3

NS 16

DS 0

SWH 2997.602 Hz

FIDRES 0.26625 Hz

AQ 1.9039052 sec

RG 512

DM 166.800 usec

DE 6.00 usec

TE 298.0 K

D1 2.00000000 sec

===== CHANNEL f1 =====

NUC1 1H

P1 6.00 usec

PL1 -4.00 dB

SFO1 300.1312599 MHz

F2 - Processing parameters

SF 300.130124 MHz

SI 32768

WDW EM

SSB 0

LB 0.50 Hz

GB 0

PC 1.00

1D NMR plot parameters

CX 22.00 cm

CY 12.00 cm

F1P 8.696 ppm

F1 2610.05 Hz

F2P -0.347 ppm

F2 -104.00 Hz

PRNCH 0.4104 ppm/cm

HZCN 123.36568 Hz/cm

KELLY-150 C13-NMR CDCl3 300K AV-300

Current Data Parameters  
 NAME S1D  
 EXNO 957  
 PROCNO 1

ppm

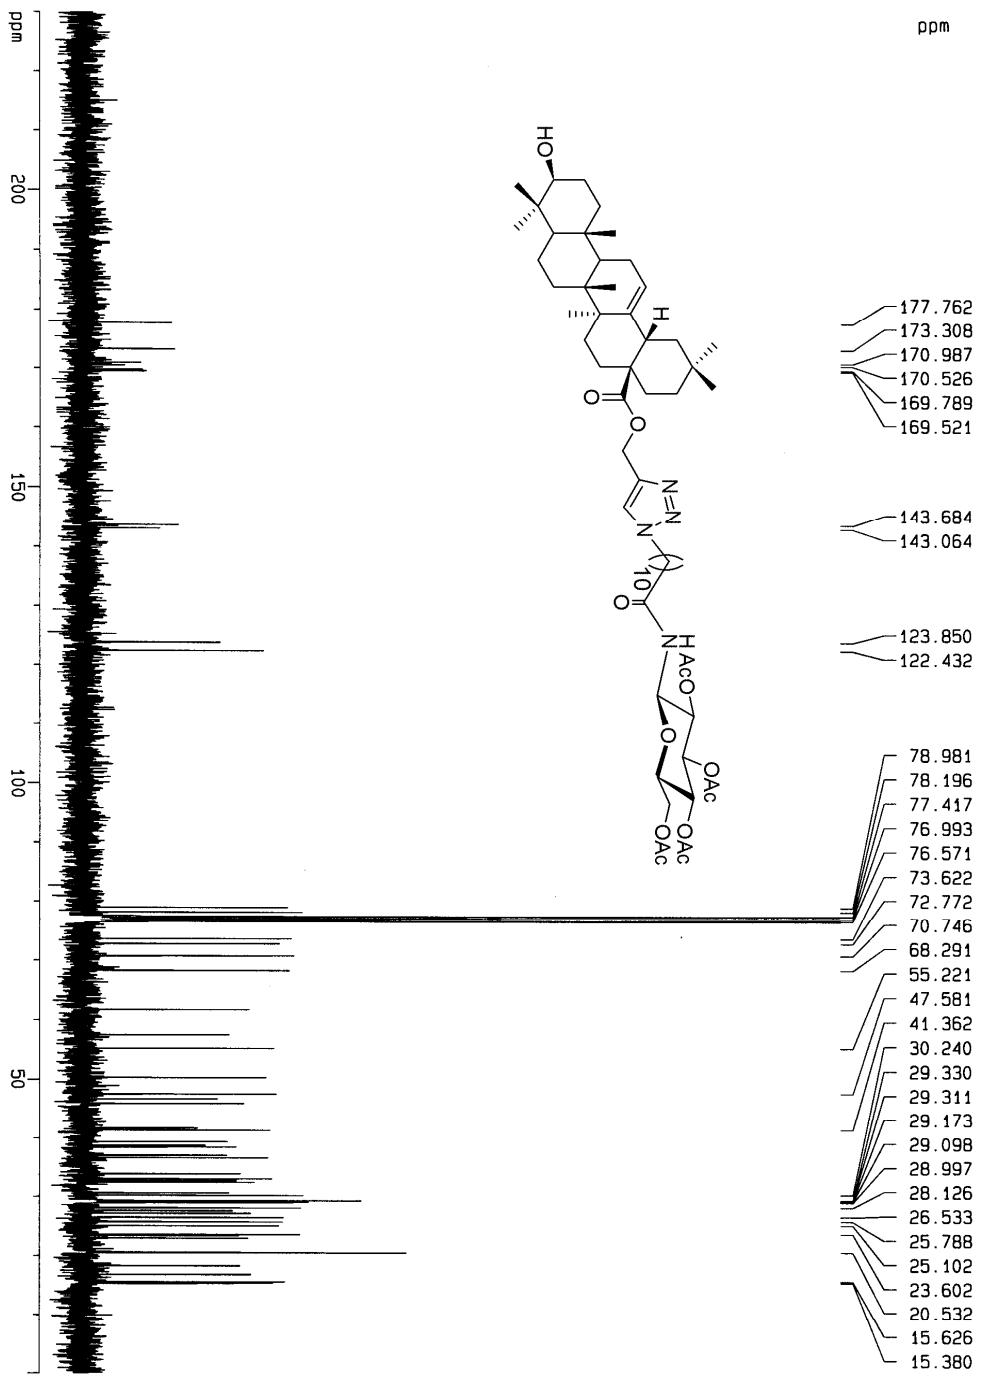

- 177.762
- 173.308
- 170.987
- 170.526
- 169.789
- 169.521
- 143.684
- 143.064
- 123.850
- 122.432
- 78.981
- 78.196
- 77.417
- 76.993
- 76.571
- 73.622
- 72.772
- 70.746
- 68.291
- 55.221
- 47.581
- 41.362
- 30.240
- 29.330
- 29.311
- 29.173
- 29.098
- 28.997
- 28.126
- 26.533
- 25.788
- 25.102
- 23.602
- 20.532
- 15.626
- 15.380

F2 - Acquisition Parameters  
 Date\_ 20080416  
 Time\_ 20.25  
 INSTRUM spect  
 PROBDW 5 mm QNP 1H/13  
 PULPROG zgpg  
 TD 32768  
 SOLVENT CDCl3  
 NS 2220  
 DS B  
 SMH 21097.047 Hz  
 FIDRES 0.649831 Hz  
 AQ 0.7766516 sec  
 RG 102400  
 DW 23.700 usec  
 DE 6.00 usec  
 TE 300.0 K  
 D1 2.00000000 sec  
 d11 0.03000000 sec

===== CHANNEL f1 =====  
 NUC1 13C  
 P1 8.00 usec  
 PL1 -2.00 dB  
 SFO1 75.4763978 MHz

===== CHANNEL f2 =====  
 CPDPRG2 waltz16  
 NUC2 1H  
 P2 80.00 usec  
 PL2 -4.00 dB  
 PL12 19.25 dB  
 SFO2 300.1312005 MHz

F2 - Processing parameters  
 SI 32768  
 SF 75.4677494 MHz  
 MDW EM  
 SSB 0  
 LB 1.00 Hz  
 GB 0  
 PC 1.00

10 NMR plot parameters  
 CX 22.50 cm  
 CY 20.00 cm  
 F1P 230.000 ppm  
 F1 17357.58 Hz  
 F2P 0.000 ppm  
 F2 0.00 Hz  
 PNHCM 10.22222 ppm/cm  
 HZCM 771.44812 Hz/cm

sub

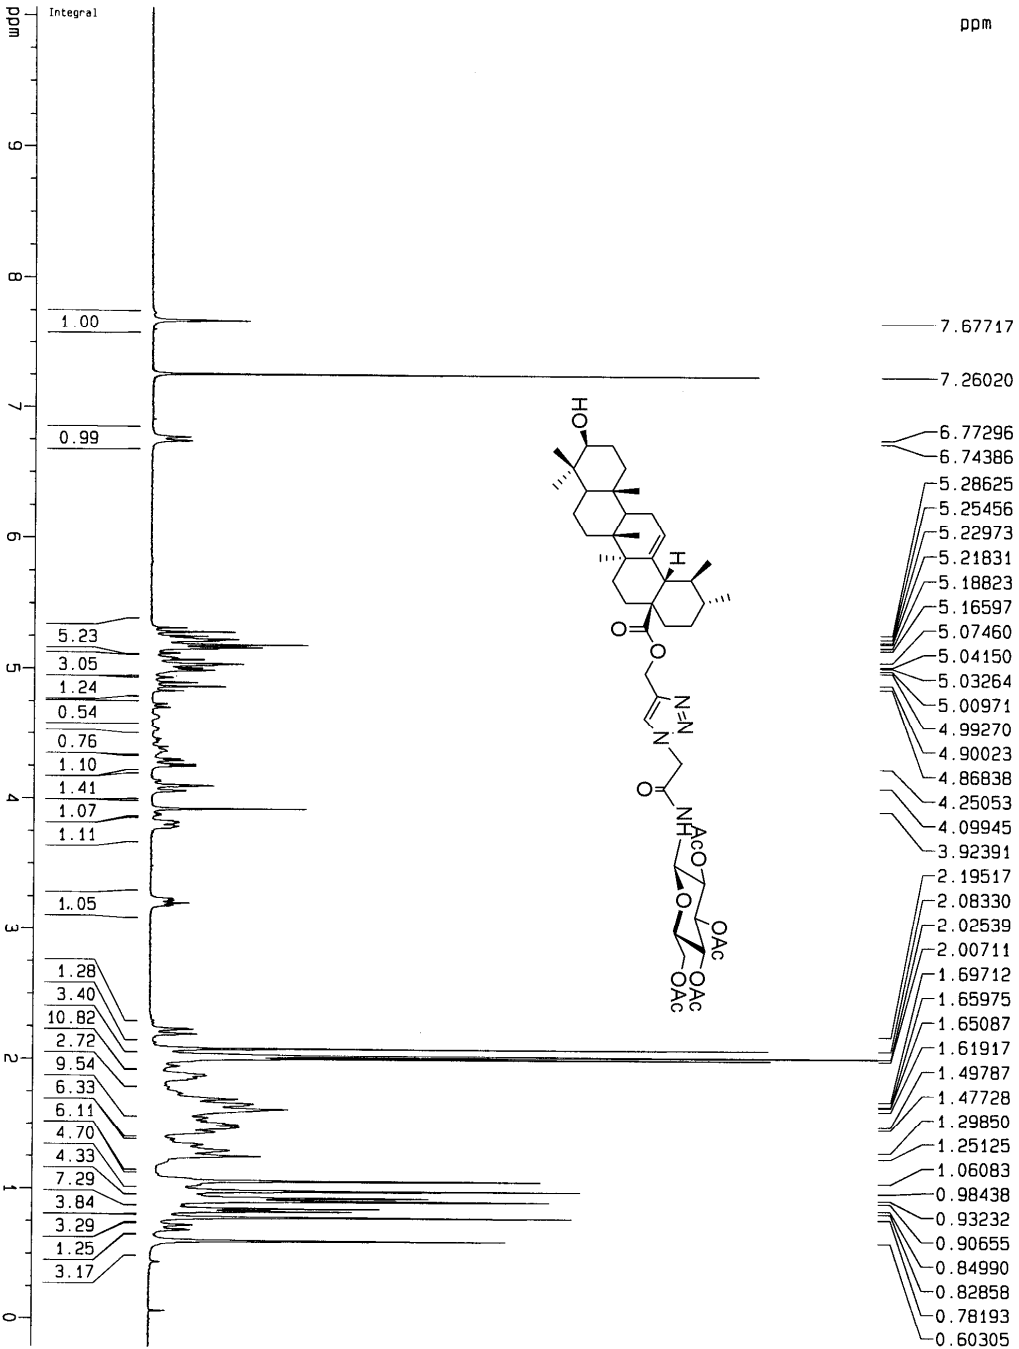

Current Data Parameters  
 NAME: spb  
 EXPNO: 890  
 PROCNO: 1

F2 - Acquisition Parameters  
 Date\_: 20080418  
 Time: 23.13  
 INSTRUM: spect  
 PROBHD: 5 mm QNP 1H/13  
 PULPROG: zg30  
 TD: 11414  
 SOLVENT: CDCl3  
 NS: 16  
 DS: 0  
 SH1: 5995.204 Hz  
 FIDRES: 0.325250 Hz  
 AQ: 0.9519776 sec  
 RG: 512  
 DM: 83.400 usec  
 DE: 5.00 usec  
 TE: 298.0 K  
 D1: 2.0000000 sec

===== CHANNEL f1 =====  
 NUC1: 1H  
 P1: 6.00 usec  
 PL1: -4.00 dB  
 SF01: 300.1324010 MHz

F2 - Processing parameters  
 SI: 32768  
 SF: 300.1300124 MHz  
 MDW: EM  
 SSB: 0  
 LB: 0.20 Hz  
 GB: 0  
 PC: 1.00

1D NMR plot parameters  
 CX: 22.00 cm  
 CY: 12.00 cm  
 F1P: 10.062 ppm  
 F1: 3080.03 Hz  
 F2P: -0.225 ppm  
 F2: -67.75 Hz  
 PPMCM: 0.46765 ppm/cm  
 HZCM: 140.35487 Hz/cm



Key11y-153 C13-NMR CDC13 300K AV-300

Current Data Parameters  
 NAME snb  
 EXPNO 922  
 PROCNO 1

F2 - Acquisition Parameters  
 Date\_ 20080423  
 Time 17.16  
 INSTRUM spect  
 PROBHD 5 mm QNP 1H/13  
 PULPROG zgpg  
 TD 32768  
 SOLVENT CDC13  
 NS 1403  
 DS 8  
 SMH 18115.941 Hz  
 FIDRES 0.552855 Hz  
 AQ 0.9044468 sec  
 RG 102400  
 DM 27.600 usec  
 DE 6.00 usec  
 TE 300.0 K  
 D1 2.00000000 sec  
 d11 0.03000000 sec

===== CHANNEL f1 =====  
 NUC1 13C  
 P1 8.00 usec  
 PL1 -2.00 dB  
 SF01 75.4763978 MHz

===== CHANNEL f2 =====  
 CPDPRG2 waltz16  
 NUC2 1H  
 PCPD2 80.00 usec  
 PL2 -4.00 dB  
 PL12 19.25 dB  
 SF02 300.1312005 MHz

F2 - Processing parameters  
 SI 32768  
 SF 75.4677490 MHz  
 KOP EM  
 SSB 0  
 LB 1.00 Hz  
 GB 0  
 PC 1.00

10 NMR plot parameters  
 CX 22.50 cm  
 CY 50.00 cm  
 F1P 211.351 ppm  
 F1 15950.22 Hz  
 F2P -3.459 ppm  
 F2 -261.01 Hz  
 PPGCM 9.54711 ppm/cm  
 HZCM 720.45902 Hz/cm

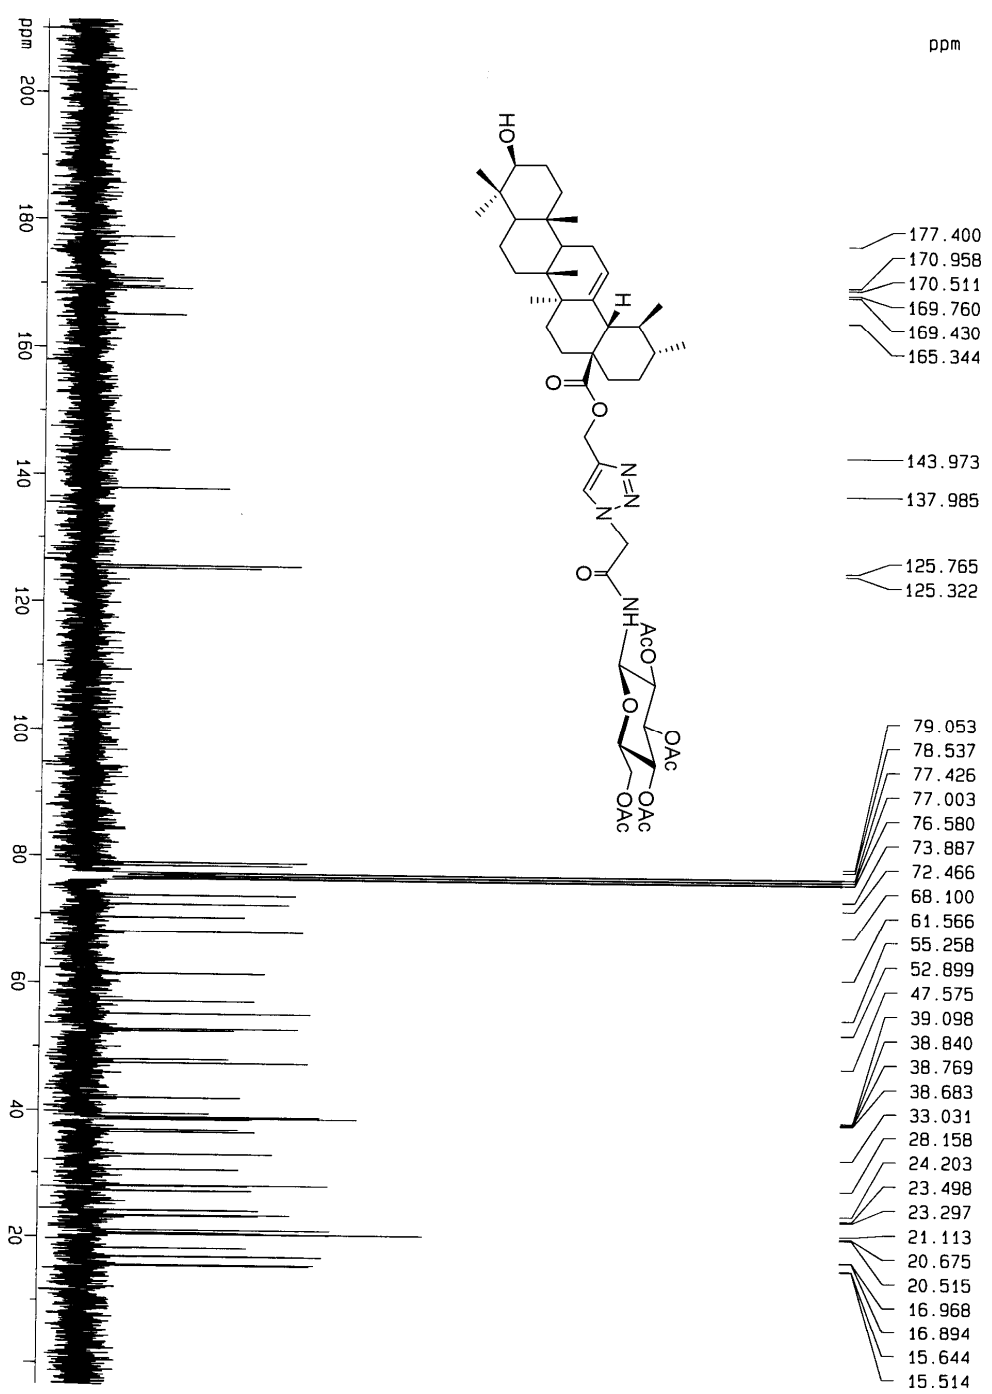

sub

Kelly-154 H1-NMR CDCl3 300K AV-300

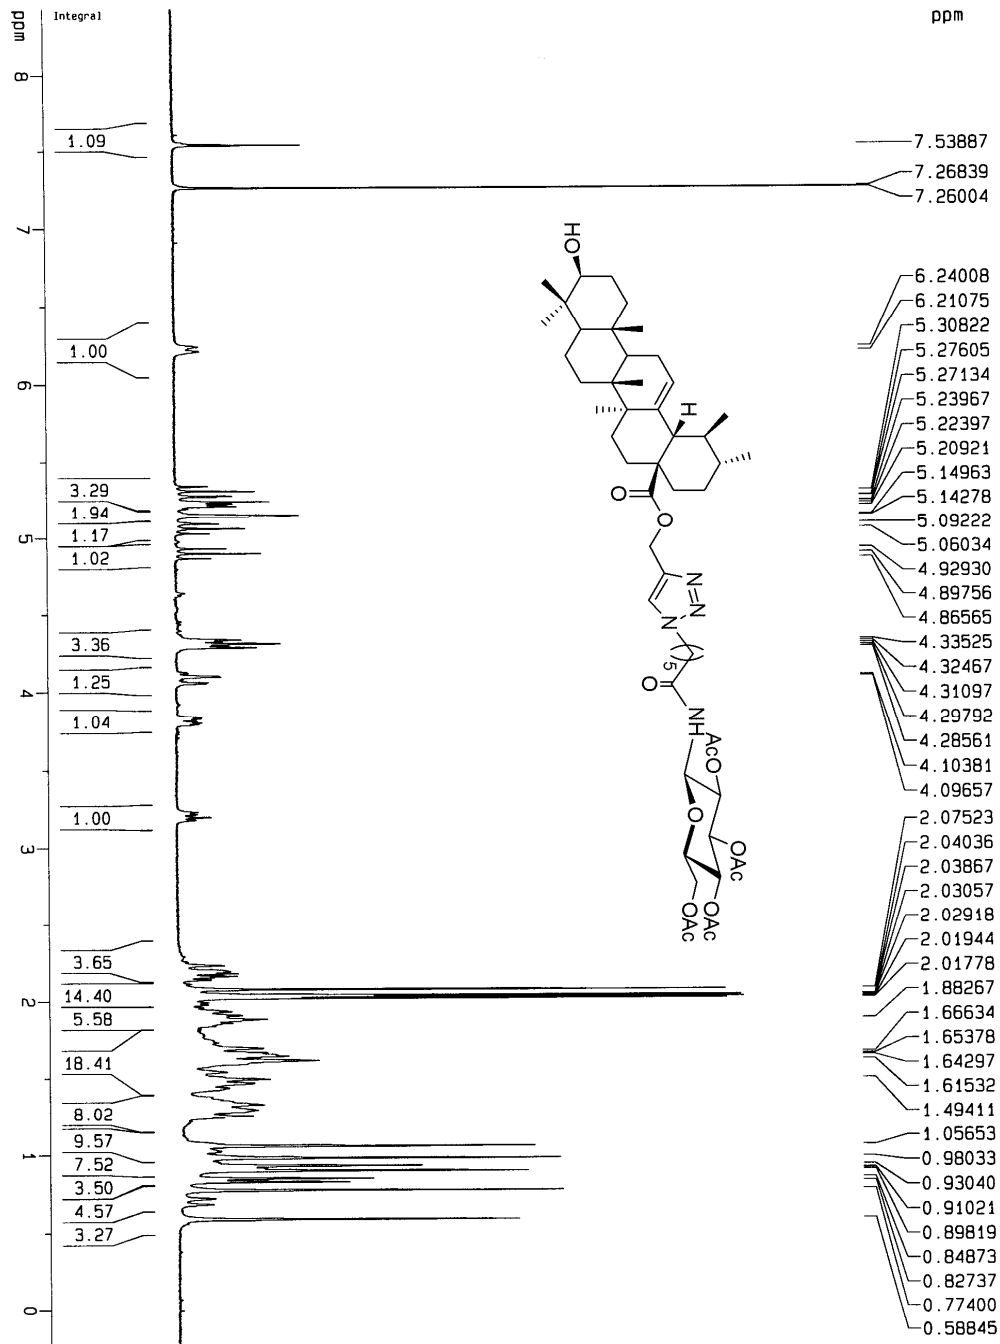

Current Data Parameters  
 NAME SHB  
 EXPNO 878  
 PROCNO 1

F2 - Acquisition Parameters  
 Date\_ 20080417  
 Time 15:57  
 INSTRUM spect  
 PROBRD 5 mm QNP 1H/13  
 PULPROG zgpg30  
 TD 18382  
 SOLVENT CDCl3  
 NS 16  
 DS 0  
 SMH 3063.726 Hz  
 FIDRES 0.166670 Hz  
 AQ 2.3999924 sec  
 RG 4456.1  
 DM 163.200 usec  
 DE 6.00 usec  
 TE 303.0 K  
 D1 2.00000000 sec

===== CHANNEL f1 =====  
 NUC1 1H  
 P1 6.00 usec  
 PL1 -4.00 dB  
 SF01 300.1312980 MHz

F2 - Processing parameters  
 SI 32768  
 SF 300.1300124 MHz  
 MDW EM  
 SSB 0  
 LB 0.10 Hz  
 GB 0  
 PC 1.00

1D NMR plot parameters  
 CX 22.00 cm  
 CY 15.00 cm  
 F1P 8.425 ppm  
 F2P 2528.84 Hz  
 F2 -0.231 ppm  
 PPM1CM 0.39530 ppm/cm  
 HZCM 118.10055 Hz/cm

sub

KELLY-154 C13-NMR CDCl3 300K AV-300

Current Data Parameters  
 NAME smp  
 EXPNO 896  
 PROCNO 1

F2 - Acquisition Parameters

Date\_ 20080421  
 Time 11:18  
 INSTRUM spect  
 PROBRD 5 mm QNP 1H/13  
 PULPROG zgpg30  
 TD 32768  
 SOLVENT CDCl3  
 NS 1829  
 DS 8  
 SMH 18115.941 Hz  
 FIDRES 0.552855 Hz  
 AQ 0.5044468 sec  
 RG 102400  
 DW 27.500 usec  
 DE 6.00 usec  
 TE 300.0 K  
 D1 2.00000000 sec  
 d11 0.03000000 sec

===== CHANNEL f1 =====

NUC1 13C  
 P1 8.00 usec  
 PL1 -2.00 dB  
 SF01 75.4753978 MHz

===== CHANNEL f2 =====

CPDPRG2 waltz16  
 NUC2 1H  
 P2 80.00 usec  
 PL2 -4.00 dB  
 PL12 19.25 dB  
 SF02 300.1312005 MHz

F2 - Processing parameters

SI 32768  
 SF 75.467506 MHz  
 WDW EM  
 SSF 0  
 LB 1.00 Hz  
 GB 0  
 PC 1.00

1D NMR plot parameters

CX 22.50 cm  
 CY 20.00 cm  
 F1P 230.000 ppm  
 F1 17357.58 Hz  
 F2P 0.000 ppm  
 F2 10.2222 ppm/cm  
 HZCM 771.44806 Hz/cm

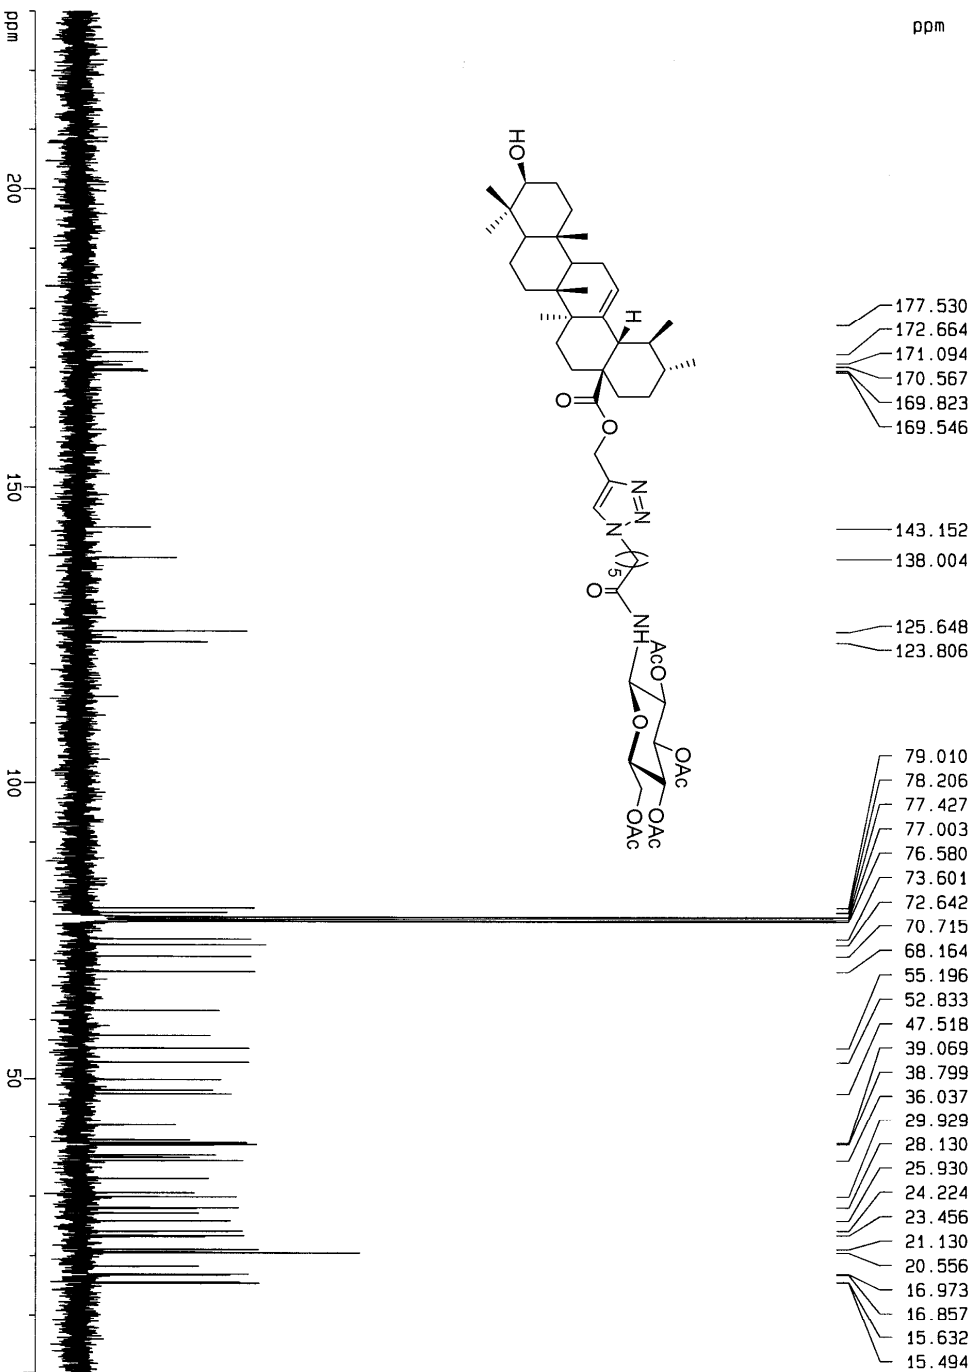

KE11Y-155 H1-NMR CDCL3 300K AV-300

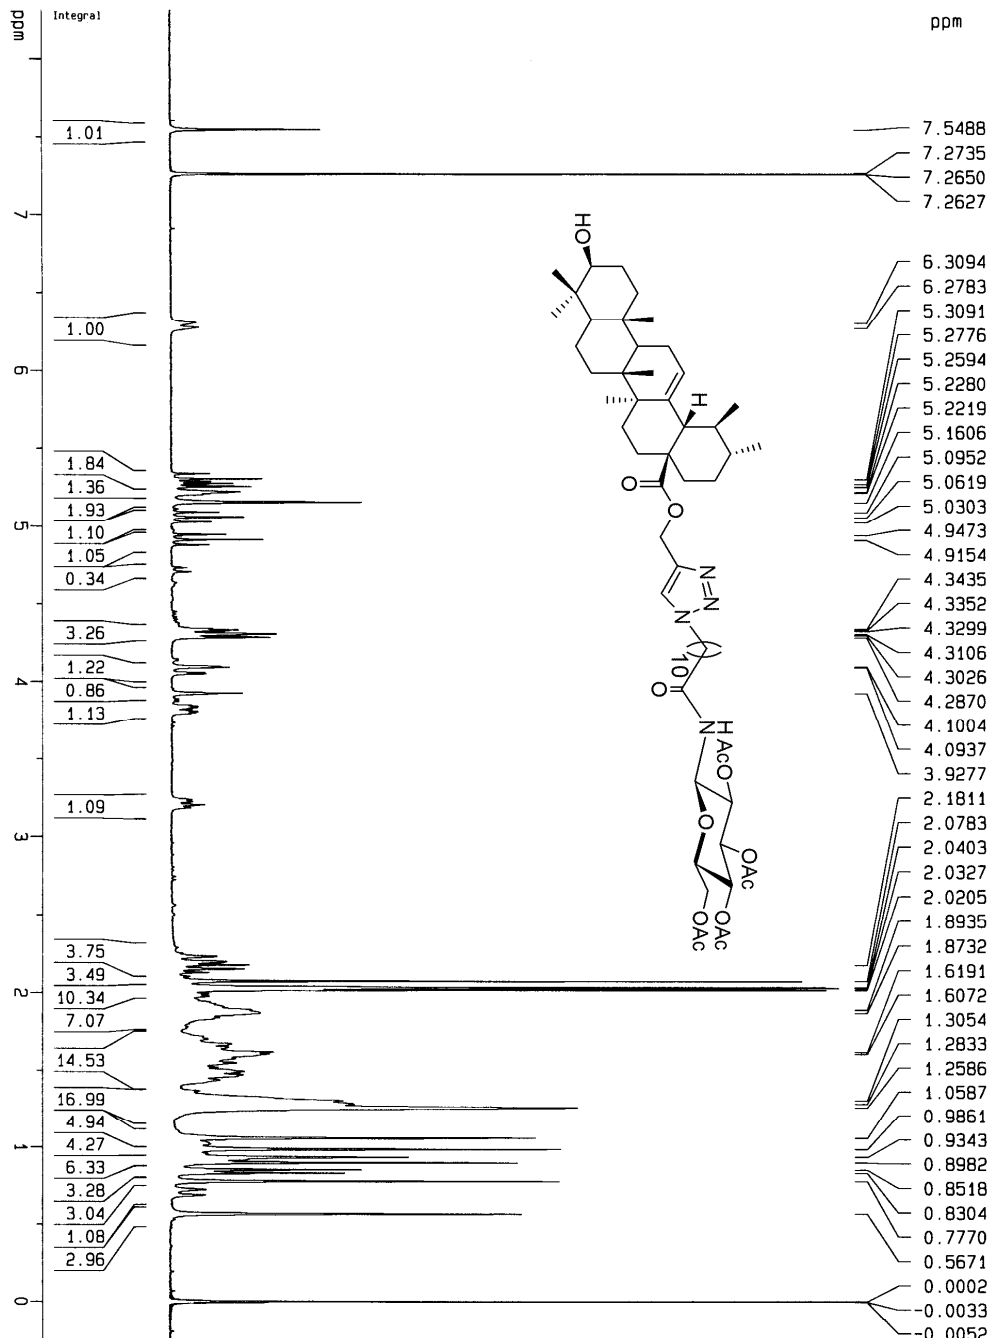

7.5488  
7.2735  
7.2650  
7.2627  
6.3094  
6.2783  
5.3091  
5.2776  
5.2594  
5.2280  
5.2219  
5.1606  
5.0952  
5.0619  
5.0303  
4.9473  
4.9154  
4.3435  
4.3352  
4.3299  
4.3106  
4.3026  
4.2870  
4.1004  
4.0937  
3.9277  
2.1811  
2.0783  
2.0403  
2.0327  
2.0205  
1.8935  
1.8732  
1.6191  
1.6072  
1.3054  
1.2833  
1.2586  
1.0587  
0.9861  
0.9343  
0.8982  
0.8518  
0.8304  
0.7770  
0.5671  
0.0002  
0.0033  
0.0052

Integral  
1.01  
1.00  
1.84  
1.36  
1.93  
1.10  
1.05  
0.34  
3.26  
1.22  
0.86  
1.13  
1.09  
3.75  
3.49  
10.34  
7.07  
14.53  
16.99  
4.94  
4.27  
6.33  
3.28  
3.04  
1.08  
2.96

Current Data Parameters  
NAME  
SIB  
EXPNO 860  
PROCNO 1

F2 - Acquisition Parameters  
Date\_ 20080416  
Time 22:22  
INSTRUM spect  
PROBHD 5 mm QNP 1H/13  
PULPROG zg30  
TD 7630  
TO 12164  
SOLVENT CDCl3  
NS 22  
DS 0  
SWH 3041.363 Hz  
FIDRES 0.260030 Hz  
AQ 1.9998116 sec  
RG 256  
DM 164.400 usec  
DE 6.00 usec  
TE 303.0 K  
D1 2.00000000 sec

\*\*\*\*\* CHANNEL f1 \*\*\*\*\*  
NUC1 1H  
P1 6.00 usec  
PL1 -4.00 dB  
SFO1 300.1314230 MHz

F2 - Processing parameters  
SI 32768  
SF 300.1300111 MHz  
WDW EM  
SSB 0  
LB 0.10 Hz  
GB 0  
PC 1.00

1D NMR plot parameters  
CX 22.00 cm  
CY 15.00 cm  
F1P 8.315 ppm  
F1 2495.54 Hz  
F2P -0.293 ppm  
F2 -97.29 Hz  
PPMCH 0.39117 ppm/cm  
HZCM 117.40135 Hz/cm

sub

KELLY-155 1H-NMR CDCL3 300K AV-300

Current Data Parameters  
 NAME shb  
 EXPNO 888  
 PROCNO 1

F2 - Acquisition Parameters  
 Date\_ 20080418  
 Time 16:11  
 INSTRUM spect  
 PROBNM 5 mm QNP 1H/13  
 PULPROG zgpg  
 TO 32768  
 SOLVENT CDCl3  
 NS 2079  
 DS 8  
 SMH 18115.941 Hz  
 FIDRES 0.55285 Hz  
 AQ 0.9044468 sec  
 RG 10240  
 DM 27.680 usec  
 DE 6.00 usec  
 TE 300.0 K  
 D1 2.00000000 sec  
 d11 0.03000000 sec

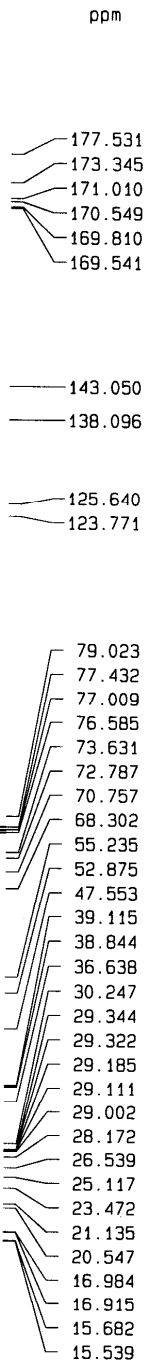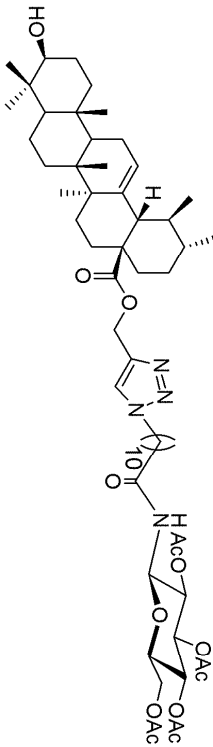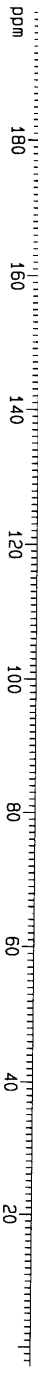

==== CHANNEL f1 =====  
 NUC1 13C  
 P1 8.00 usec  
 PL1 -2.00 dB  
 SF01 75.4763978 MHz  
 ===== CHANNEL f2 =====  
 CPDPRG2 waltz16  
 NUC2 1H  
 PCPD2 80.00 usec  
 PL2 -4.00 dB  
 PL12 19.25 dB  
 SF02 300.1312005 MHz  
 F2 - Processing parameters  
 SI 32758  
 SF 75.4677484 MHz  
 MDK EM  
 SSB 0  
 LB 1.00 Hz  
 GB 0  
 PC 1.00

1D NMR plot parameters  
 CX 22.50 cm  
 CY 20.00 cm  
 F1p 199.905 ppm  
 F1 15096.40 Hz  
 F2p -2.914 ppm  
 F2 -219.89 Hz  
 PPMCM 9.01418 ppm/cm  
 HZCM 880.27972 Hz/cm

KELLY-156 1H-NMR CDCL3 300K AV-300

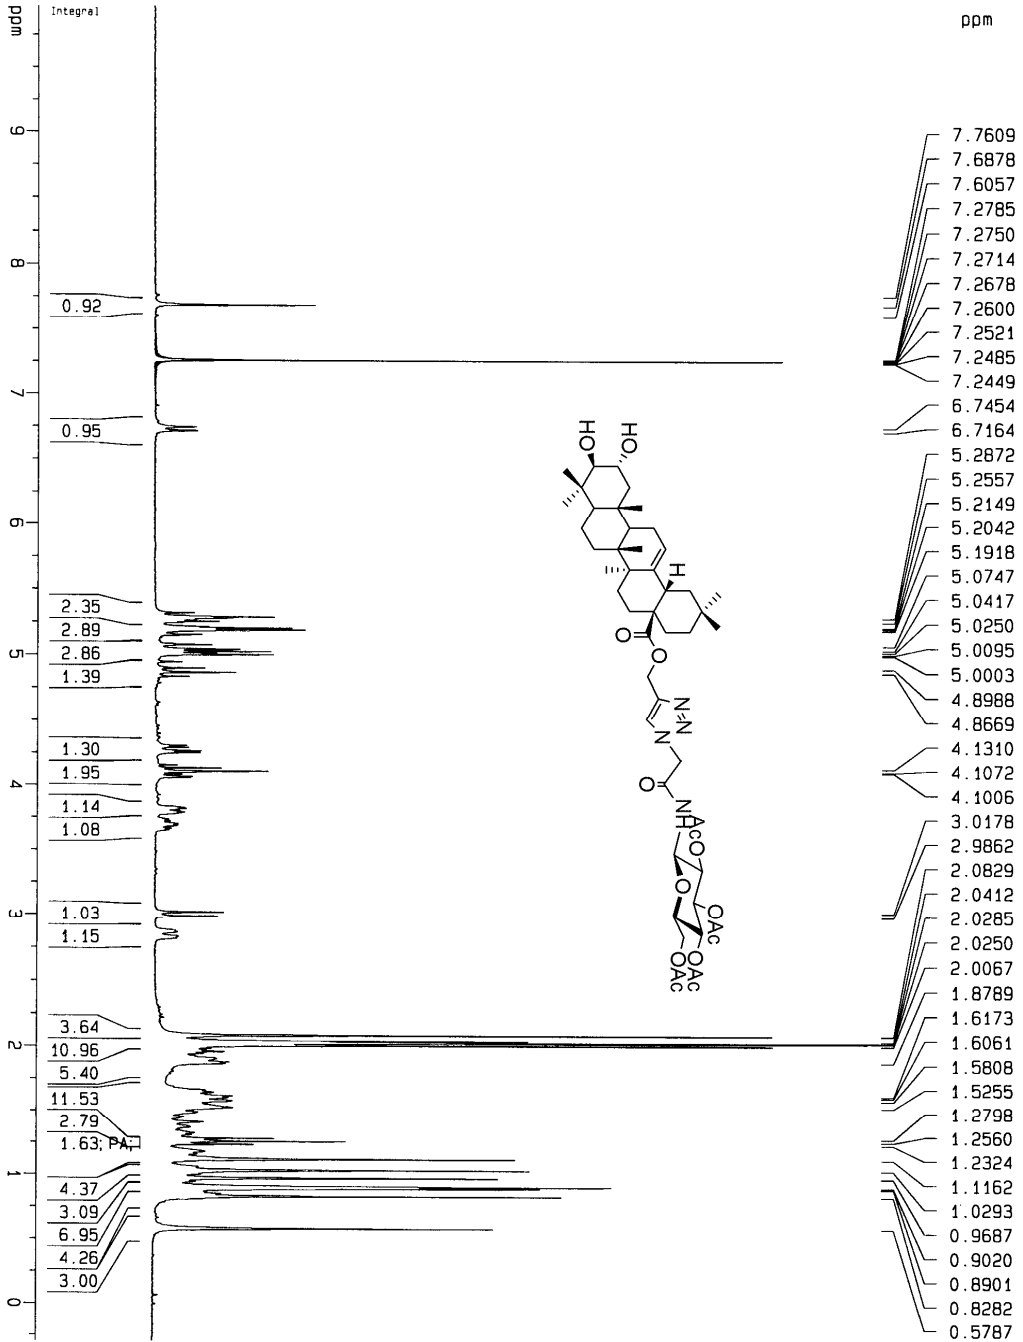

ppm

7.7609  
7.6878  
7.6057  
7.2785  
7.2750  
7.2714  
7.2678  
7.2600  
7.2521  
7.2485  
7.2449  
6.7454  
6.7164  
5.2872  
5.2557  
5.2149  
5.2042  
5.1918  
5.0747  
5.0417  
5.0250  
5.0095  
5.0003  
4.8988  
4.8669  
4.1310  
4.1072  
4.1006  
3.0178  
2.9862  
2.0829  
2.0412  
2.0285  
2.0250  
2.0067  
1.8789  
1.6173  
1.6061  
1.5808  
1.5255  
1.2798  
1.2560  
1.2324  
1.1162  
1.0293  
0.9687  
0.9020  
0.8901  
0.8282  
0.5787

Integral

0.92  
0.95  
2.35  
2.89  
2.86  
1.39  
1.30  
1.95  
1.14  
1.08  
1.03  
1.15  
3.64  
10.96  
5.40  
11.53  
2.79  
1.63; PA  
4.37  
3.09  
6.95  
4.26  
3.00

ppm

Current Data Parameters

NAME sld  
EXPNO 891  
PROCNO 1

F2 - Acquisition Parameters

Date\_ 20080418  
Time 23:21  
INSTRUM spect  
PROBHD 5 mm GNP 1H/13  
PULPROG zg30  
TD 11414  
SOLVENT CDCl3  
NS 16  
DS 0  
SMH 5995.204 Hz  
FIDRES 0.525250 Hz  
AQ 0.9519776 sec  
RG 512  
DE 83.400 usec  
TE 298.0 K  
D1 2.00000000 sec

===== CHANNEL f1 =====

NUC1 1H  
P1 6.00 usec  
PL1 -4.00 dB  
SFO1 300.1324010 MHz

F2 - Processing parameters

SF 300.1300124 MHz  
SI 32768  
SF 300.1300124 MHz  
WDW EM  
SSB 0  
LB 0.50 Hz  
GB 0  
PC 1.00

1D NMR plot parameters

CH 22.00 cm  
CY 12.00 cm  
F1P 9.970 ppm  
F1 2992.30 Hz  
F2P -0.295 ppm  
F2 -88.57 Hz  
PPMCM 0.46560 ppm/cm  
HZCM 140.03949 Hz/cm

Kelly-156 C13-NMR CDCl3 300K AV-300

Current Data Parameters  
 NAME shb  
 EXPNO 923  
 PROCNO 1

F2 - Acquisition Parameters  
 Date\_ 20080423  
 Time 18.27  
 INSTRUM spect  
 PROBRD 5 mm QNP 1H/13  
 PULPROG zgpg30  
 TD 32768  
 SOLVENT CDCl3  
 NS 1498  
 DS 8  
 SMH 18115.941 Hz  
 FIDRES 0.552865 Hz  
 AQ 0.904468 sec  
 RG 102400  
 DW 27.600 usec  
 DE 6.00 usec  
 TE 300.0 K  
 D1 2.00000000 sec  
 d11 0.03000000 sec

\*\*\*\*\* CHANNEL f1 \*\*\*\*\*  
 NUC1 13C  
 P1 8.00 usec  
 PL1 -2.00 dB  
 SF01 75.4753978 MHz

\*\*\*\*\* CHANNEL f2 \*\*\*\*\*  
 CPDPRG2 waltz16  
 NUC2 1H  
 PCPD2 80.00 usec  
 PL2 -4.00 dB  
 PL12 19.25 dB  
 SF02 300.1312005 MHz

F2 - Processing parameters  
 SI 32768  
 SF 75.467506 MHz  
 MDW EM  
 SSB 0  
 LB 1.00 Hz  
 GB 0  
 PC 1.00

10 NMR plot parameters  
 CX 22.50 cm  
 CY 12.00 cm  
 FIP 206.001 ppm  
 F1 15546.46 Hz  
 F2 -5.153 ppm  
 PPGM 9.36909 ppm/cm  
 HZCM 706.27124 Hz/cm

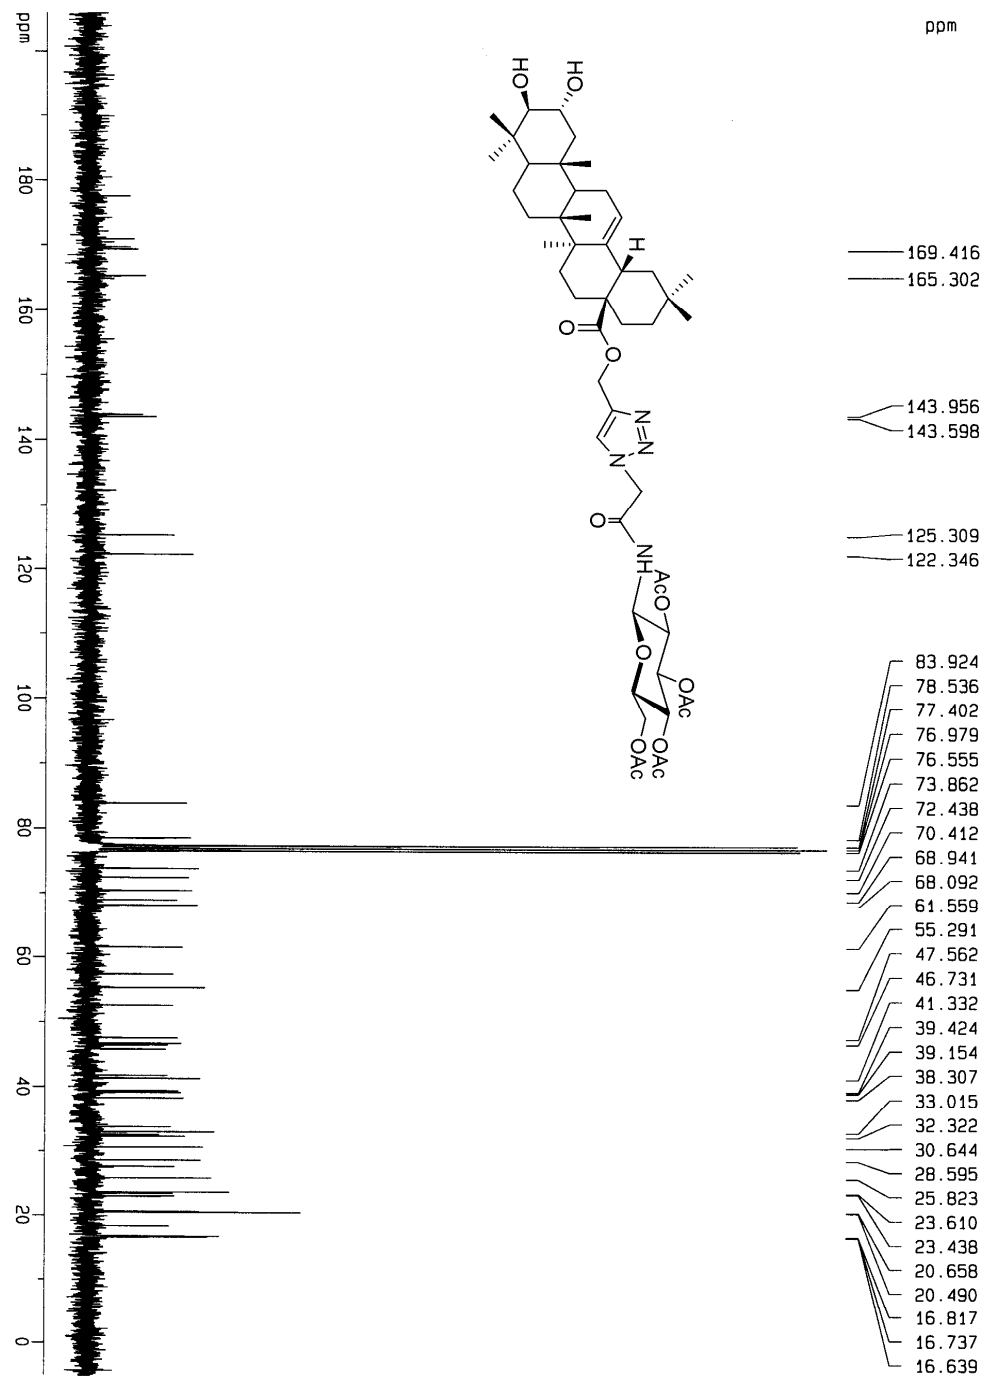

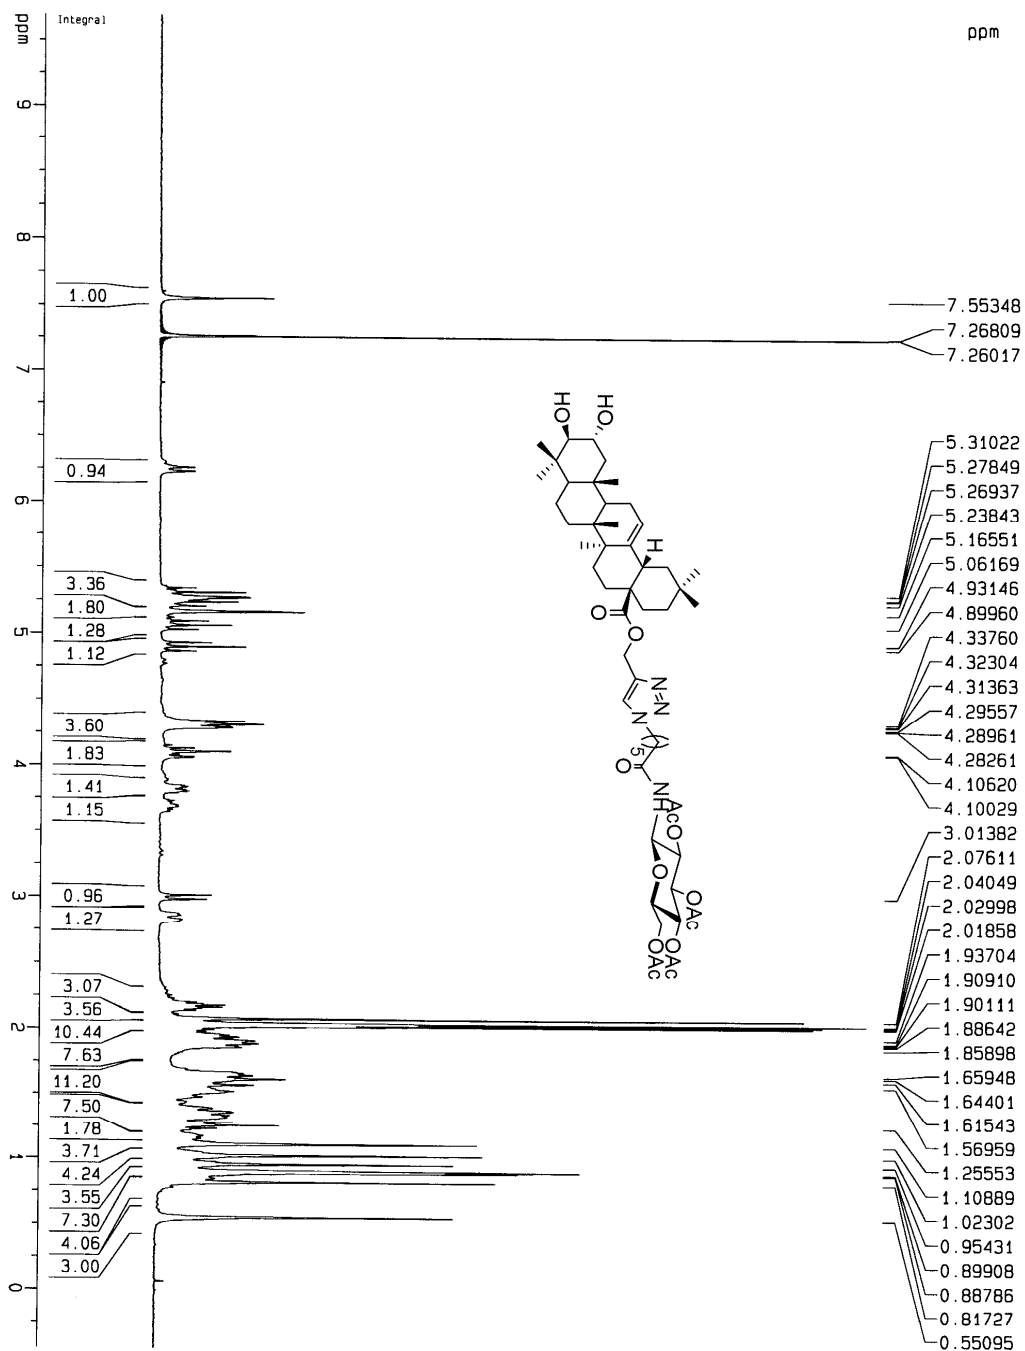

Current Data Parameters  
 NAME shb  
 EXPNO 882  
 PROCNO 1

F2 - Acquisition Parameters  
 Date\_ 20080418  
 Time 23.18  
 INSTRUM spect  
 PROBRD 5 mm QNP 1H/13  
 PULPROG zg30  
 TD 13414  
 SOLVENT CDCl3  
 NS 16  
 DS 0  
 SMH 5995.204 Hz  
 FIDRES 0.528250 Hz  
 AQ 0.9519776 sec  
 RG 512  
 DM 83.400 usec  
 DE 6.00 usec  
 TE 298.0 K  
 D1 2.00000000 sec

\*\*\*\*\* CHANNEL f1 \*\*\*\*\*  
 NUC1 1H  
 P1 6.00 usec  
 PL1 -4.00 dB  
 SFO1 300.1324010 MHz

F2 - Processing parameters  
 SI 32768  
 SF 300.1300124 MHz  
 MDW EM  
 SSB 0  
 LB 0.50 Hz  
 GB 0  
 PC 1.00

1D NMR plot parameters  
 CX 22.00 cm  
 CY 12.00 cm  
 F1P 9.693 ppm  
 F1 2909.03 Hz  
 F2P -0.457 ppm  
 F2 -137.14 Hz  
 PPHCM 0.46134 ppm/cm  
 HZCM 138.46245 Hz/cm



Kelly-157 C13-NMR CDC13 300K AV-300

Current Data Parameters  
 NAME srb  
 EXPNO 924  
 PROCNO 1

F2 - Acquisition Parameters

Date\_ 20080423  
 Time 20:01  
 INSTRUM spect  
 PROBHD 5 mm QNP 1H/13  
 PULPROG zgpgc  
 TO 32768  
 SOLVENT CDCl3  
 NS 2163  
 DS 8  
 SMH 18115.941 Hz  
 FIDRES 0.552855 Hz  
 AQ 0.9044468 sec  
 RG 102400  
 DW 27.600 usec  
 DE 6.00 usec  
 TE 300.0 K  
 D1 2.00000000 sec  
 d11 0.03000000 sec

===== CHANNEL f1 =====  
 NUC1 13C  
 P1 8.00 usec  
 PL1 -2.00 dB  
 SF01 75.4763978 MHz

===== CHANNEL f2 =====  
 CPDPRG2 waltz16  
 NUC2 1H  
 PPRP2 80.00 usec  
 PL2 -4.00 dB  
 PL12 19.29 dB  
 SF02 300.1312005 MHz

F2 - Processing parameters  
 SI 32768  
 SF 75.4677506 MHz  
 NQW EM  
 SSB 0  
 LB 1.00 Hz  
 GB 0  
 PC 1.00

1D NMR plot parameters  
 CX 22.50 cm  
 CY 30.00 cm  
 F1P 230.000 ppm  
 F1 17357.58 Hz  
 F2P -3.000 ppm  
 F2 -226.40 Hz  
 PPGCM 10.35656 ppm/cm  
 HZCM 781.51050 Hz/cm

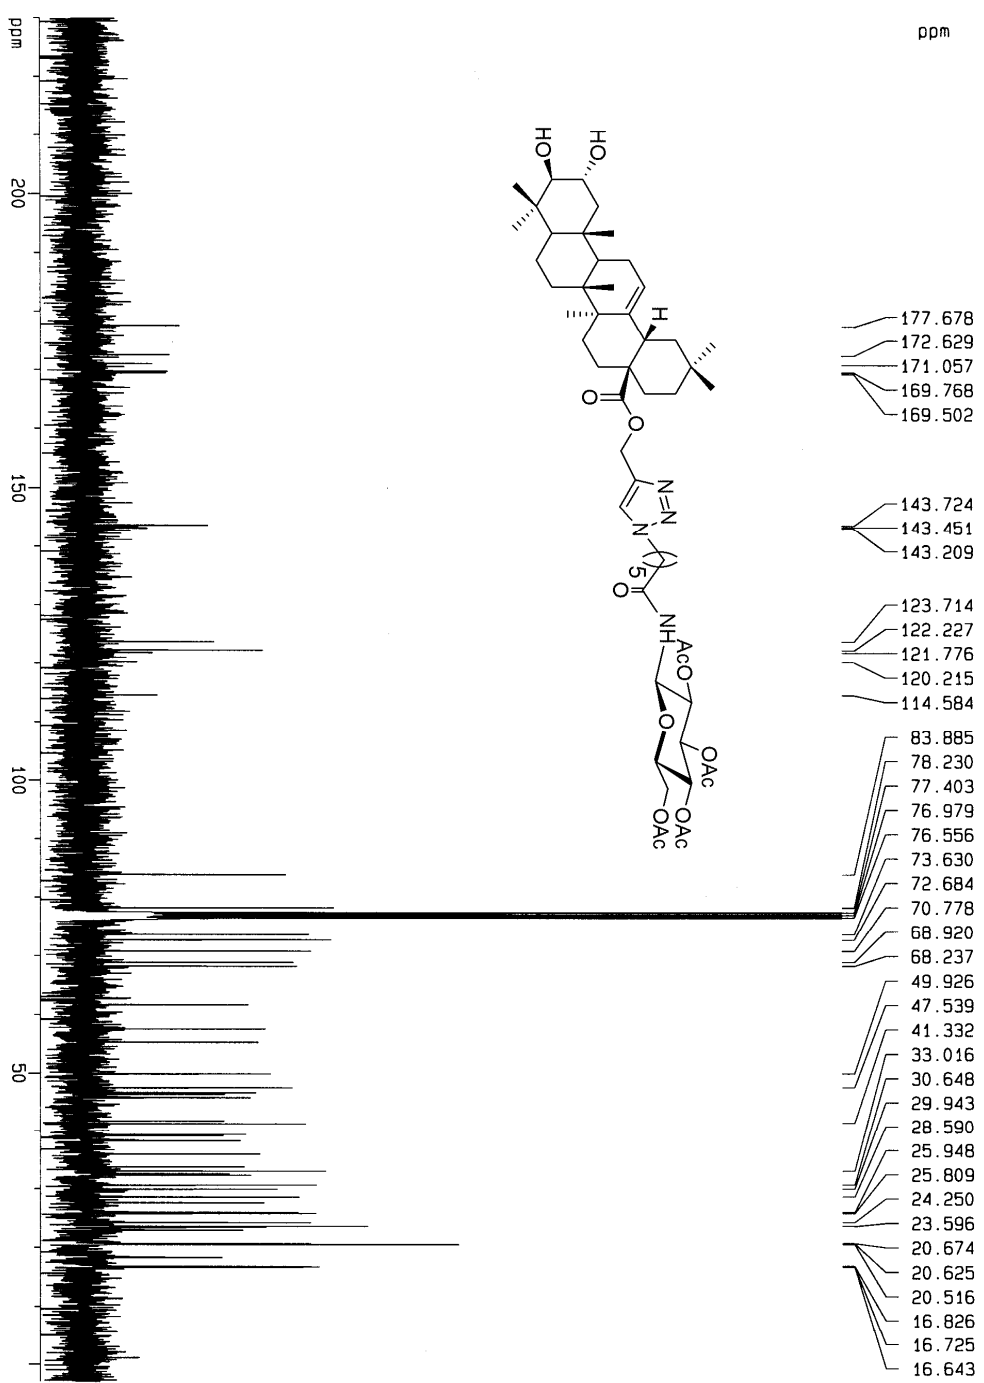

srb

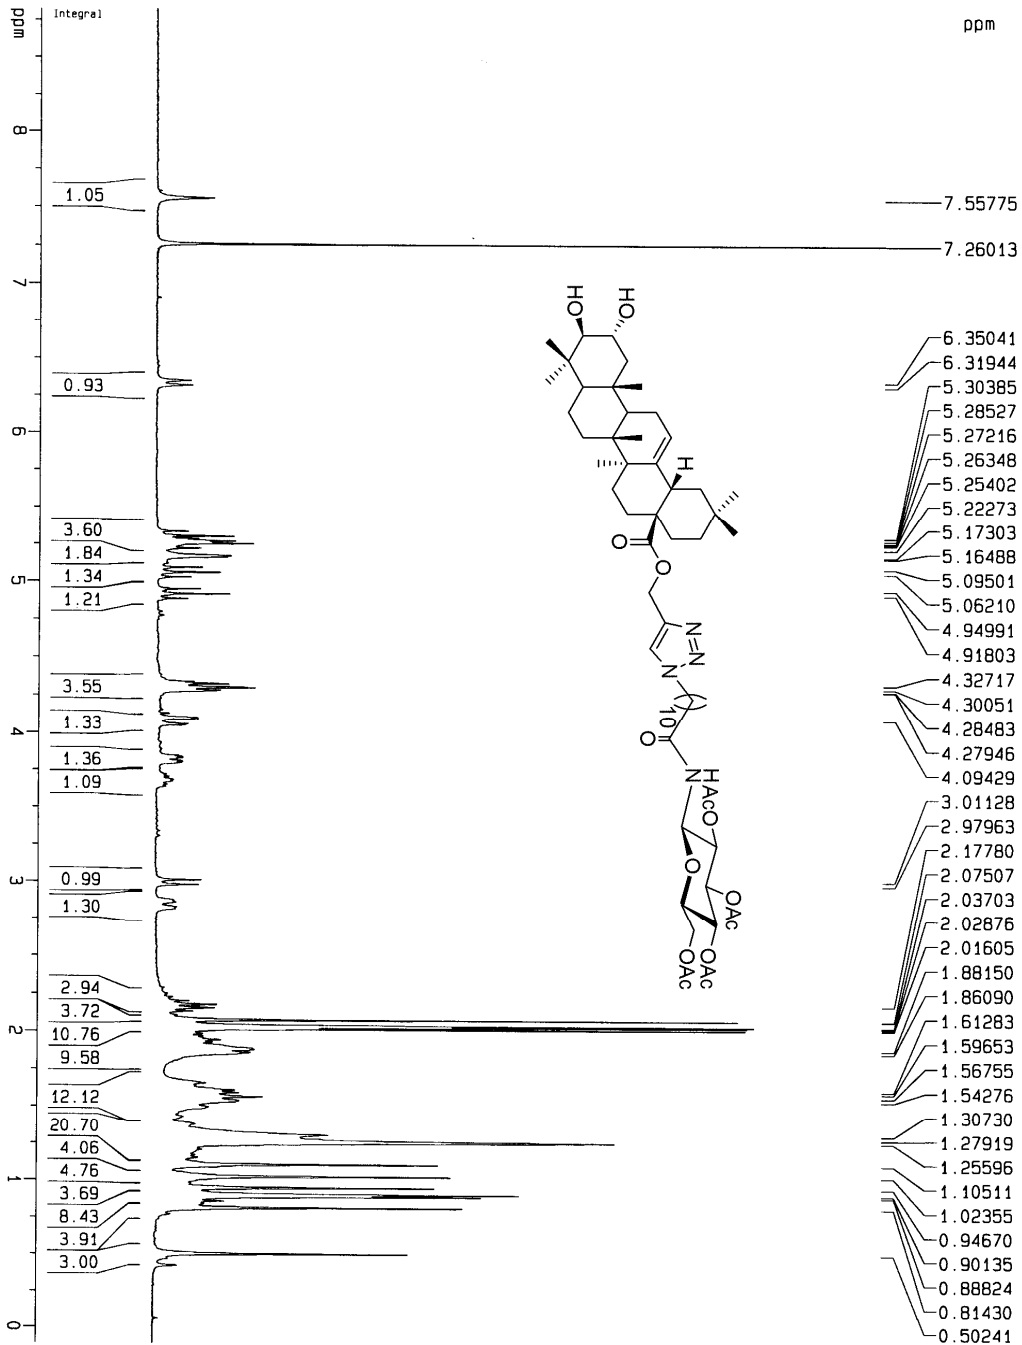

Current Data Parameters  
 NAME shb  
 EXPNO 893  
 PROCNO 1

F2 - Acquisition Parameters  
 Date\_ 20080418  
 Time 23:26  
 INSTRUM spect  
 PROBHD 5 mm QNP 1H/13  
 PULPROG zgpg30  
 TD 14144  
 SOLVENT CDCl3  
 NS 16  
 DS 0  
 SMI 4166.667 Hz  
 FIDRES 0.365049 Hz  
 AQ 1.3697300 sec  
 RG 512  
 DM 120.000 usec  
 DE 6.00 usec  
 TE 298.0 K  
 D1 2.00000000 sec

\*\*\*\*\* CHANNEL f1 \*\*\*\*\*  
 NUC1 1H  
 P1 6.00 usec  
 PL1 -4.00 dB  
 SF01 300.1314990 MHz

F2 - Processing parameters  
 SI 32768  
 SF 300.1300124 MHz  
 MDN EM  
 SSB 0  
 LB 0.50 Hz  
 GB 0  
 PC 1.00

1D NMR Plot parameters  
 CX 62.00 cm  
 CY 12.00 cm  
 F1P 8.825 ppm  
 F1 2648.79 Hz  
 F2P -0.108 ppm  
 F2 -32.54 Hz  
 PRACH 0.40693 ppm/cm  
 HZCM 121.87850 Hz/cm

KELLY-158 C13-NMR CDCl3 300K AV-300

Current Data Parameters  
 NAME s1b  
 EXPNO 925  
 PROCNO 1

F2 - Acquisition Parameters  
 Date\_ 20080424  
 Time 8.18  
 INSTRUM spect  
 PROCNO 5  
 PULPROG zgpg30  
 TD 32768  
 SOLVENT CDCl3  
 NS 2620  
 DS 8  
 SMH 18115.941 Hz  
 FIDRES 0.552855 Hz  
 AQ 0.9044468 sec  
 RG 102400  
 DM 27.600 usec  
 DE 6.00 usec  
 TE 300.0 K  
 D1 2.00000000 sec  
 d11 0.03000000 sec

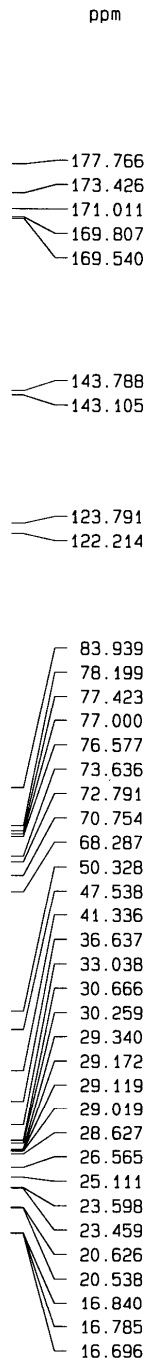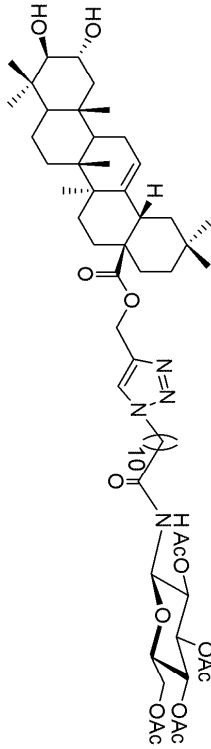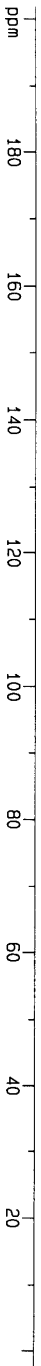

F2 - Processing parameters  
 SI 32768  
 SF 75.4677490 MHz  
 MDW EM  
 SSB 0  
 LB 1.00 Hz  
 GB 0  
 PC 1.00

10 NMR plot parameters:  
 CX 22.50 cm  
 CY 12.00 cm  
 F1P 201.817 ppm  
 F1 15230.67 Hz  
 F2P -2.898 ppm  
 F2 -218.66 Hz  
 PPKCM 9.09842 ppm/cm  
 HZCM 686.63751 Hz/cm

sub

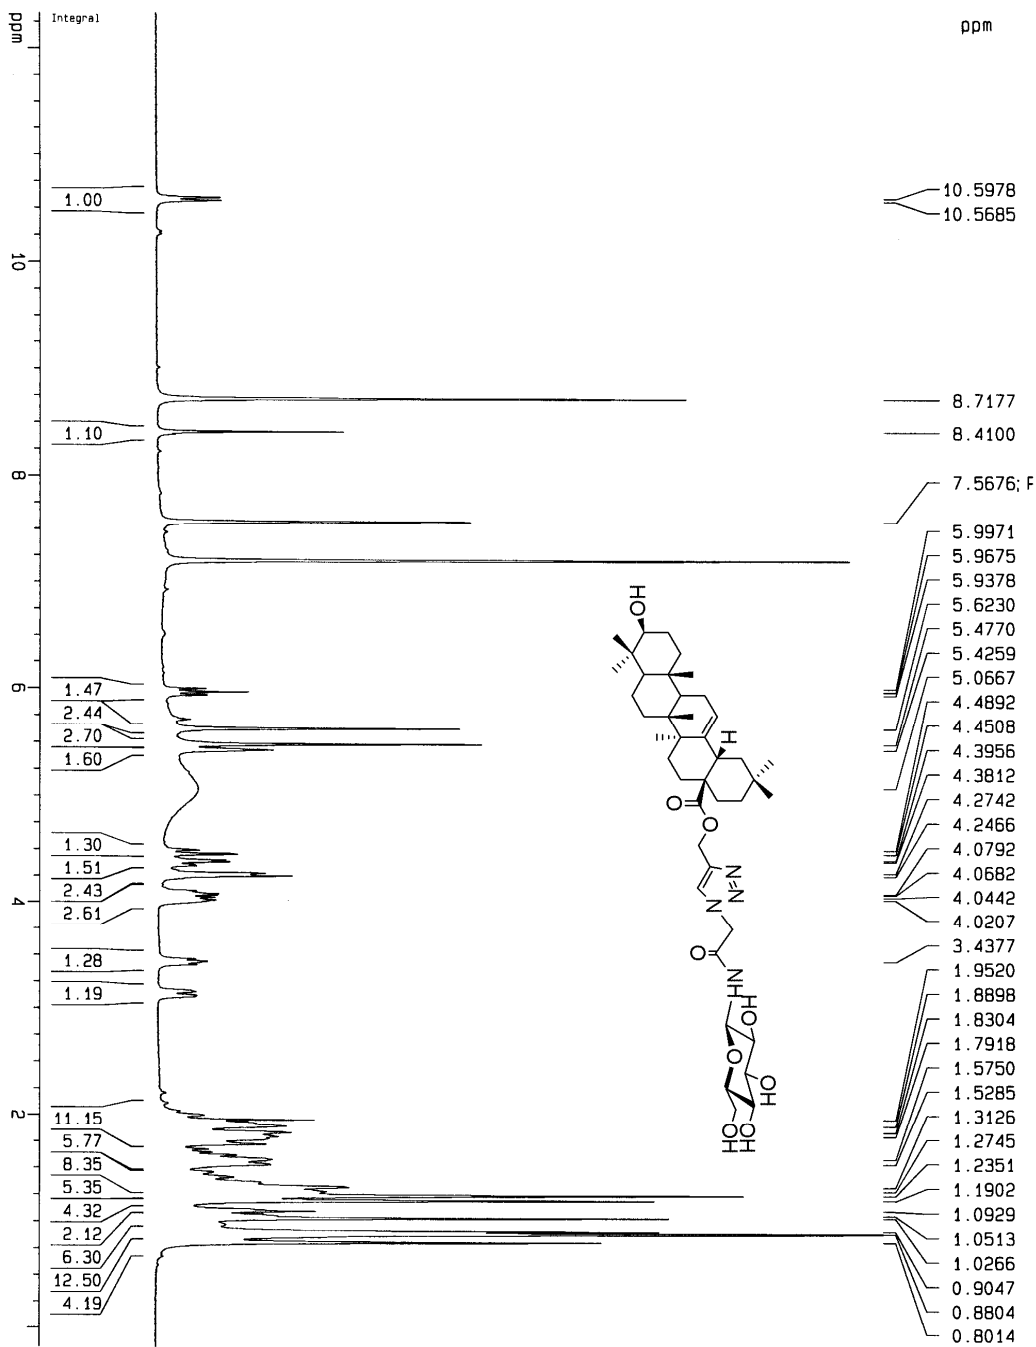

Current Data Parameters  
 NAME SMO  
 EXNO 50  
 PROCNO 1

F2 - Acquisition Parameters  
 Date\_ 20080415  
 Time 13.18  
 INSTRUM Spect  
 PROHD 5 mm QNP 1H/13  
 PULPROG zg30  
 TD 11414  
 SOLVENT Pyr  
 NS 16  
 DS 0  
 SHW 5995.204 Hz  
 FIDRES 0.528260 Hz  
 AQ 0.9519776 sec  
 RG 322.5  
 DW 83.400 usec  
 DE 6.00 usec  
 TE 298.0 K  
 D1 2.00000000 sec

===== CHANNEL f1 =====  
 NUC1 1H  
 P1 6.00 usec  
 PL1 -4.00 dB  
 SF01 300.1324010 MHz

F2 - Processing parameters  
 SI 32768  
 SF 300.1299889 MHz  
 MCM EM  
 SSB 0  
 LB 0.50 Hz  
 GB 0  
 PC 1.00

1D NMR plot parameters  
 CX 22.00 cm  
 CY 15.00 cm  
 F1P 12.331 ppm  
 F1 3701.03 Hz  
 F2P -0.184 ppm  
 F2 -55.17 Hz  
 PPMCM 0.56888 ppm/cm  
 HZCM 170.73676 Hz/cm

Kelly-151 C13-NMR C5D5N 30K AV-500

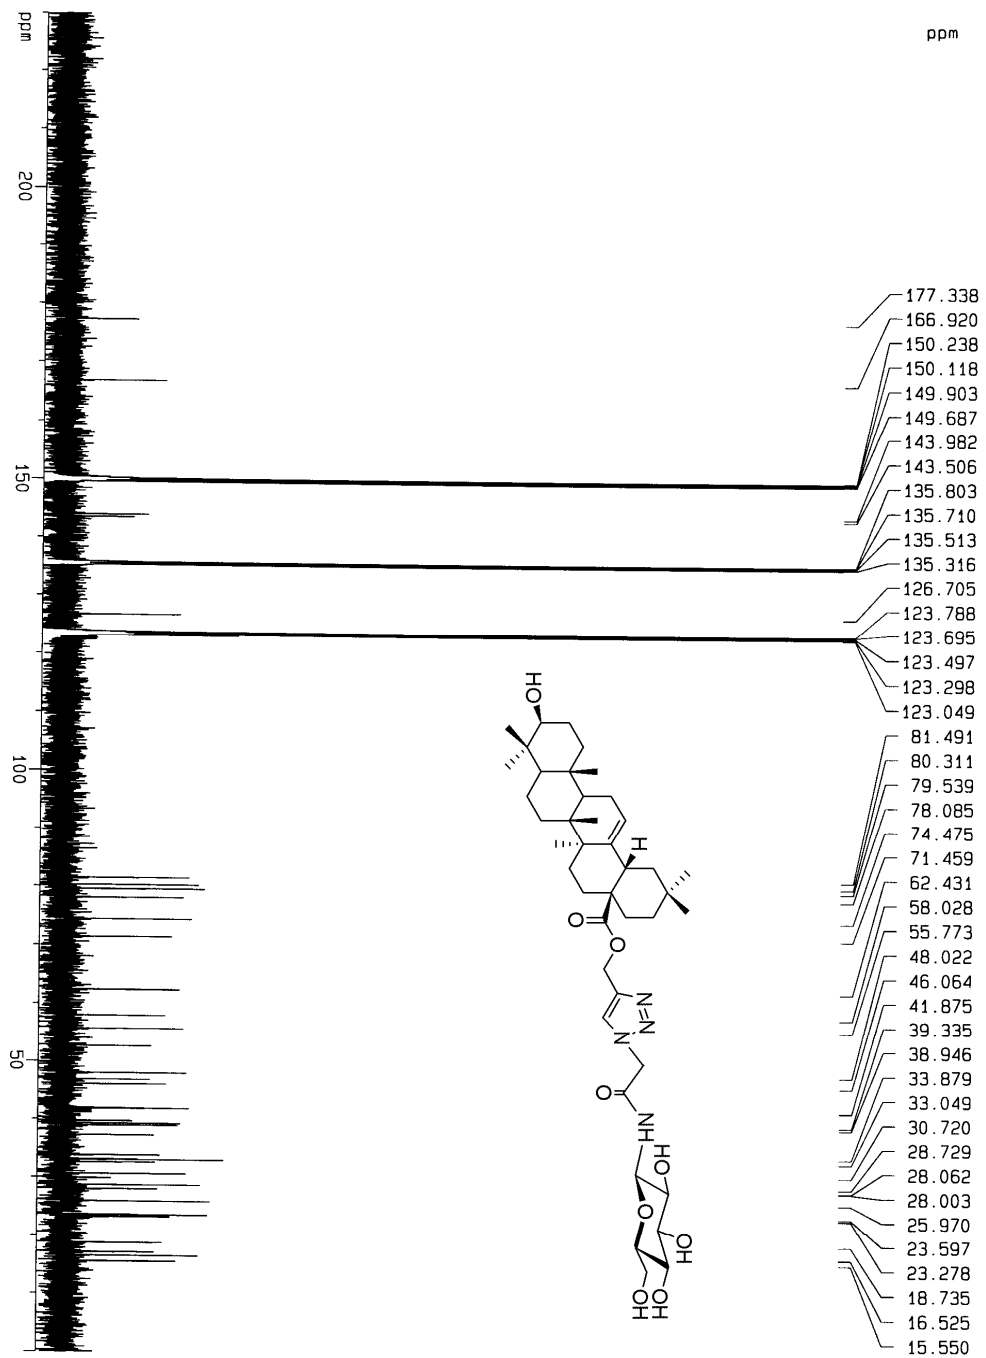

- 177.338
- 166.920
- 150.238
- 150.118
- 149.903
- 149.687
- 143.982
- 143.506
- 135.803
- 135.710
- 135.513
- 135.316
- 126.705
- 123.788
- 123.695
- 123.497
- 123.298
- 123.049
- 81.491
- 80.311
- 79.539
- 78.085
- 74.475
- 71.459
- 62.431
- 58.028
- 55.773
- 48.022
- 46.064
- 41.875
- 39.335
- 38.946
- 33.879
- 33.049
- 30.720
- 28.729
- 28.062
- 28.003
- 25.970
- 23.597
- 23.278
- 18.735
- 16.525
- 15.550

Current Data Parameters  
 NAME 80804  
 EXPNO 105  
 PROCNO 1

F2 - Acquisition Parameters  
 Date\_ 20080417  
 Time 15.02  
 INSTRUM svs00  
 PROBHD 5 mm QNP 1H/15  
 PULPROG zgpg  
 TD 32768  
 SOLVENT Pyr  
 NS 662  
 DS 8  
 SWH 30229.746  
 FIDRES 0.922539  
 AQ 0.5420493  
 RG 102400  
 DW 16.540  
 DE 20.67  
 TE 308.0  
 D1 1.50000000  
 D11 0.03000000

===== CHANNEL f1 =====  
 NUC1 13C  
 P1 9.50  
 PL1 -2.00  
 SF01 125.772011

===== CHANNEL f2 =====  
 CPDPRG2 waltz16  
 NUC2 1H  
 PCPD2 80.00  
 PL2 -5.00  
 PL12 10.92  
 SF02 500.1320005

F2 - Processing parameters  
 SI 32768  
 SF 125.7577605  
 MDW EM  
 SSB 0  
 LB 1.00  
 GB 0  
 PC 1.00

10 NMR plot parameters  
 CX 22.00  
 CY 30.00  
 F1P 230.000  
 F1 28924.29  
 F2P 0.000  
 F2 0.000  
 PPMCM 10.45455  
 HZCM 1314.74036

Sub

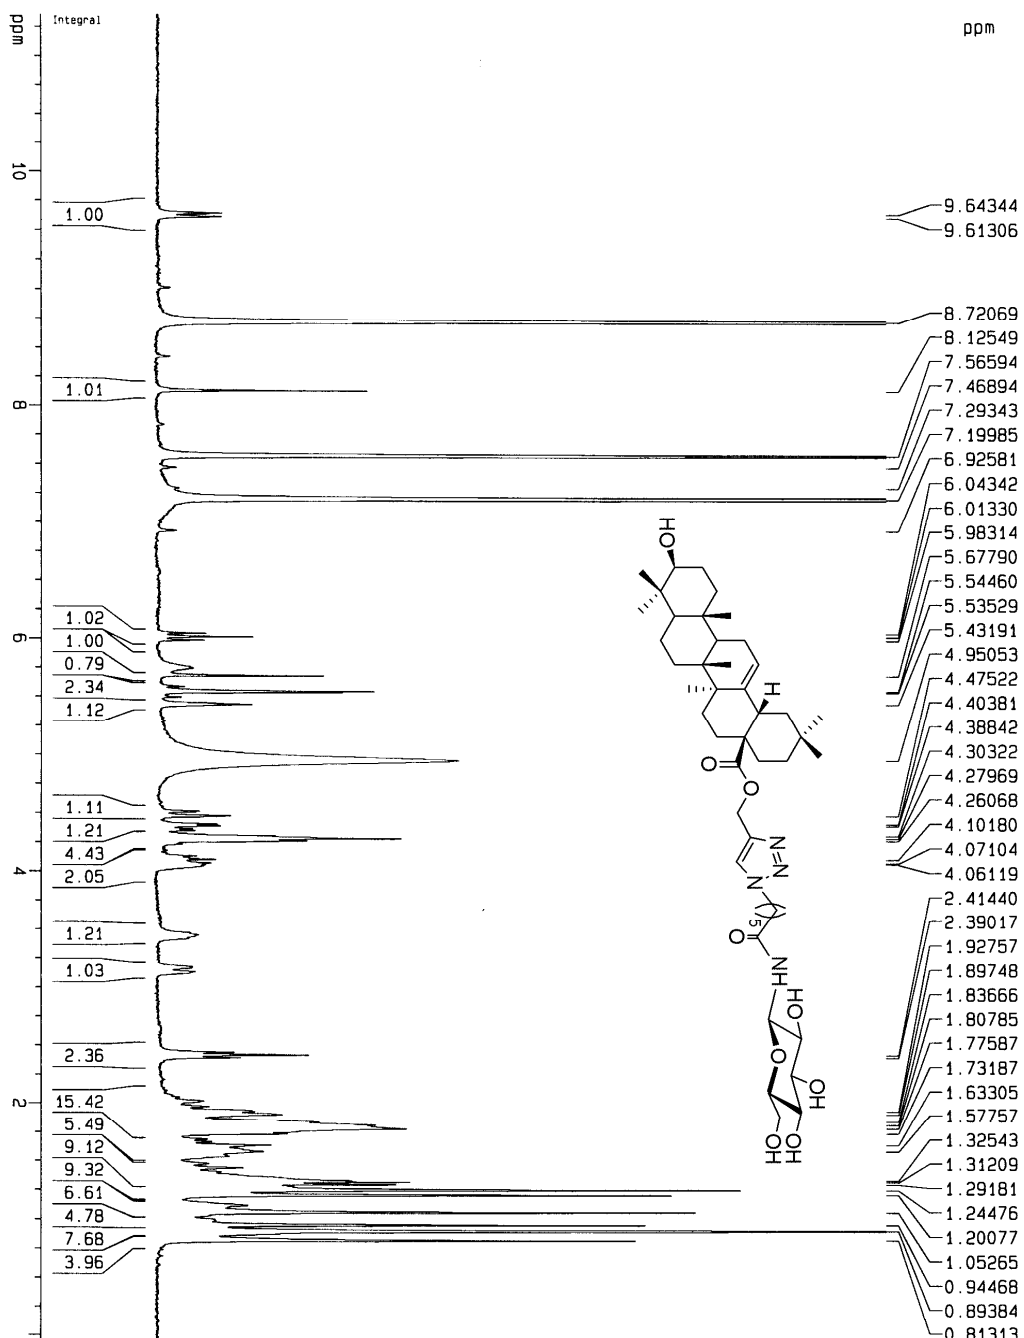

```

Current Data Parameters
NAME          shb
EXPNO        851
PROCNO       1

F2 - Acquisition Parameters
Date_         20080415
Time          13:27
INSTRUM      spect
PROBHD       5 mm QNP 1H/13
PULPROG      zg30
TD            11414
SOLVENT      Pyr
NS            32
DS            0
SH1           4496.403 Hz
FIDRES        0.393938 Hz
AQ            1.2692968 sec
RG            322.5
DE            111.200 usec
TE            298.0 K
D1            2.00000000 sec

***** CHANNEL f1 *****
NUC1          1H
P1            6.00 usec
PL1           -4.00 dB
SF01         300.1317419 MHz

F2 - Processing parameters
SI            32768
SF            300.1299895 MHz
WDW           EM
SSB           0
LB            0.50 Hz
GB            0
PC            1.00

1D NMR plot parameters
CX            22.00 cm
CY            50.00 cm
F1P           11.355 ppm
F1            3408.02 Hz
F2P           -0.097 ppm
F2            -28.16 Hz
PP4CK        0.35205 ppm/cm
HZCM         156.23543 Hz/cm
    
```

Kel11y-152 C13-NMR CSD5N 303K AV-500

Current Data Parameters  
 NAME 40804  
 EXPNO 106  
 PROCNO 1

F2 - Acquisition Parameters  
 Date\_ 20080417  
 Time 15.29

INSTRUM a3500  
 PULPROG 5 mm QNP 1H/15  
 PULPROG 29dc  
 TD 32768  
 SOLVENT Pyz  
 NS 2576  
 DS 8  
 SWH 30229.746  
 FIDRES 0.322939  
 AQ 0.5420493  
 RG 102400  
 DM 16.540  
 DE 20.67  
 TE 309.0  
 O1 1.50000000  
 O1 0.03000000  
 d11

===== CHANNEL f1 =====  
 NUC1 13C  
 P1 9.50  
 PL1 -2.00  
 RF1 125.7722011  
 SF01

===== CHANNEL f2 =====  
 CPDPRG2 waltz16  
 NUC2 1H  
 PCPD2 80.00  
 PL2 -5.00  
 PL12 10.92  
 SF02 500.1320005

F2 - Processing parameters  
 SI 32768  
 SF 125.757587  
 NDM EM  
 SSB 0  
 LB 1.00  
 GB 0  
 PC 1.00

10 NMR plot parameters  
 CX 22.00  
 CY 60.00  
 F1P 230.000  
 F1 26924.29  
 F2P 0.000  
 F2 10.45455  
 PPMCK 1314.74036  
 HZCM

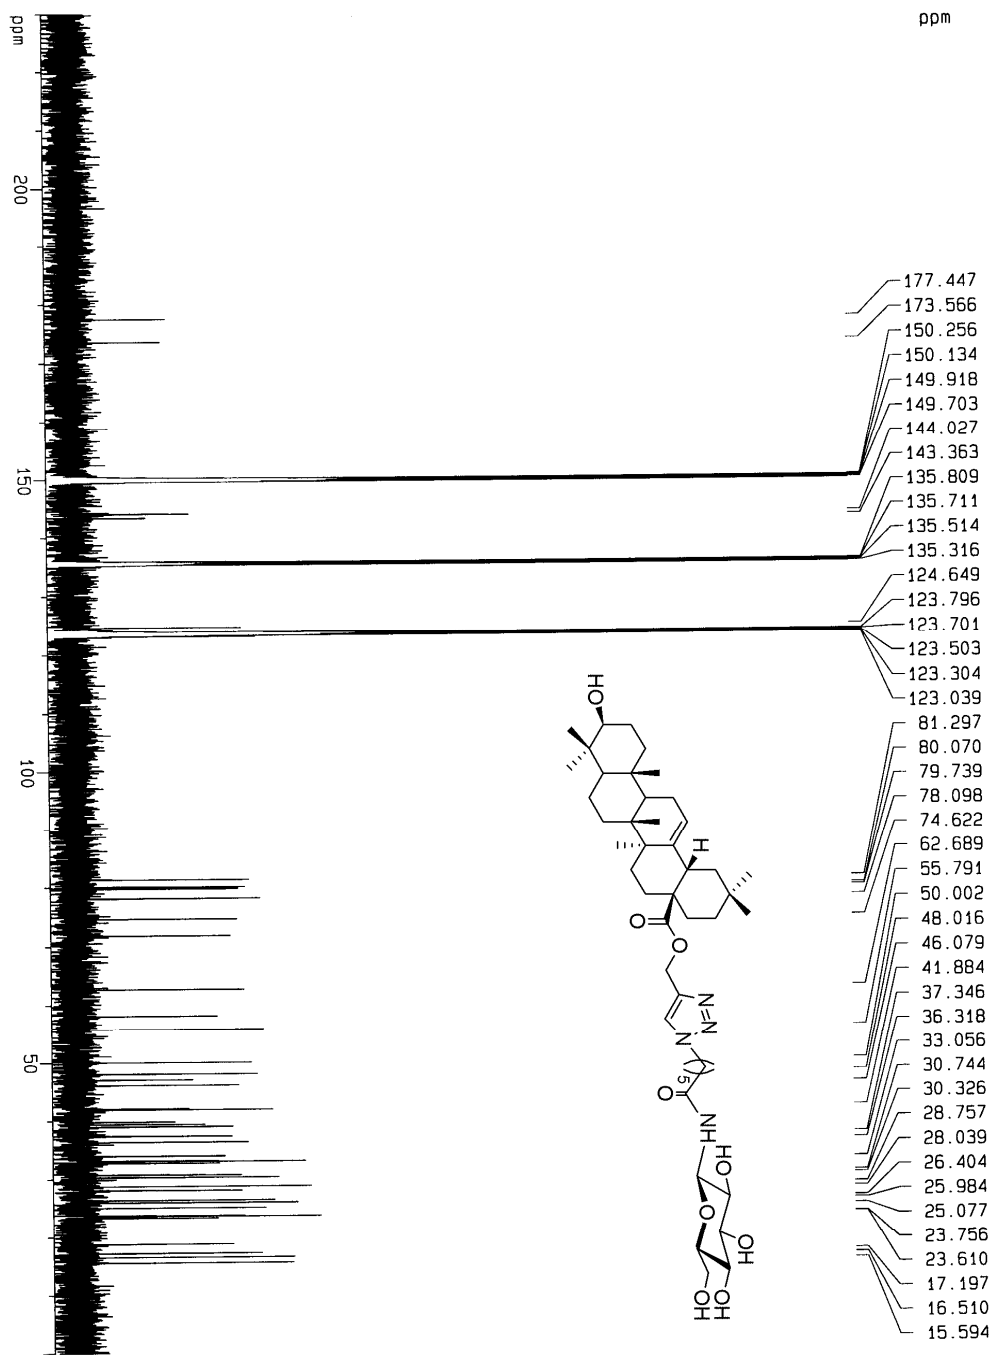

Sub

Kelly-159 H1-NMR +D2O C505N 300K AV-30C

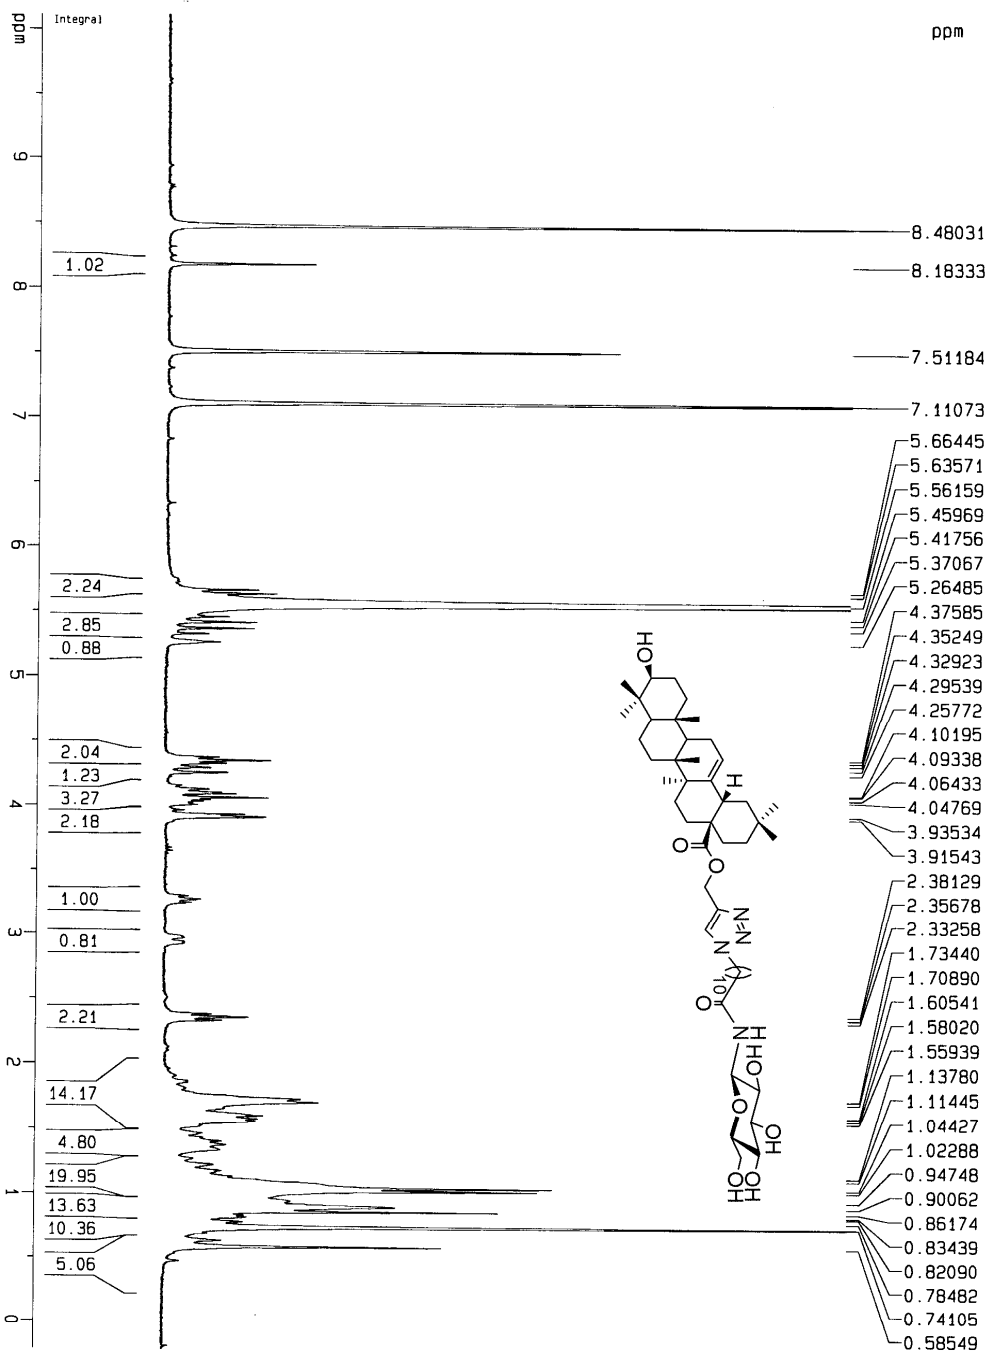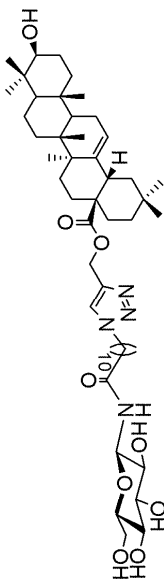

Current Data Parameters  
 NAME snb  
 EXPNO 919  
 PROCNO 1

F2 - Acquisition Parameters  
 Date\_ 20080423  
 Time 16.29  
 INSTRUM spect  
 PULPROG 5 mm QNP 1H/13  
 TD 2030  
 SOLVENT H<sub>2</sub>O  
 NS 32  
 DS 0  
 SMH 3906.250 Hz  
 FIDRES 0.162896 Hz  
 AQ 3.0694900 sec  
 RG 287.4  
 DM 128.000 usec  
 DE 6.00 usec  
 TE 303.0 K  
 D1 2.00000000 sec

\*\*\*\*\* CHANNEL f1 \*\*\*\*\*  
 NUC1 1H  
 P1 6.00 usec  
 PL1 -4.00 dB  
 SFO1 300.1317408 MHz

F2 - Processing parameters  
 S1 32789  
 SF 300.1300150 MHz  
 MDM EM  
 SSB 0  
 LB 0.10 Hz  
 GB 0  
 PC 1.00

1D NMR plot parameters  
 CX 22.00 cm  
 CY 150.00 cm  
 F1P 10.114 ppm  
 F1 3035.419 Hz  
 F2P -0.225 ppm  
 F2 -67.61 Hz  
 PPM/CM 0.46995 ppm/cm  
 HZ/CM 141.04880 Hz/cm

SMN



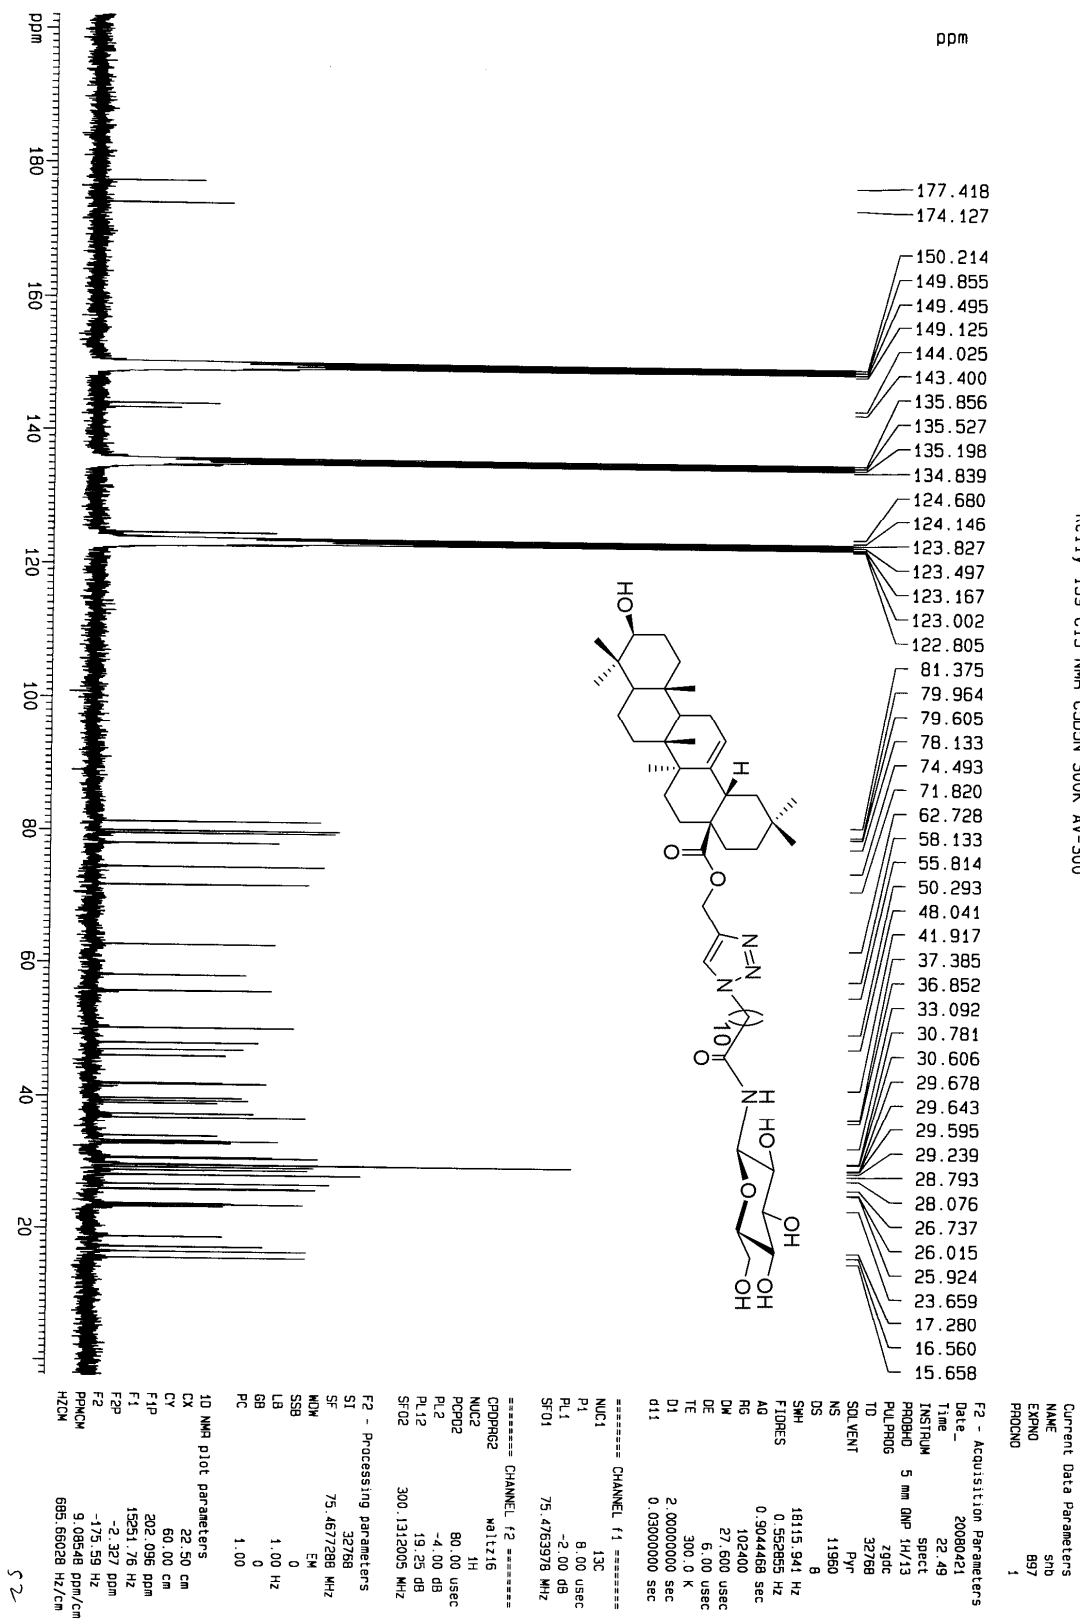

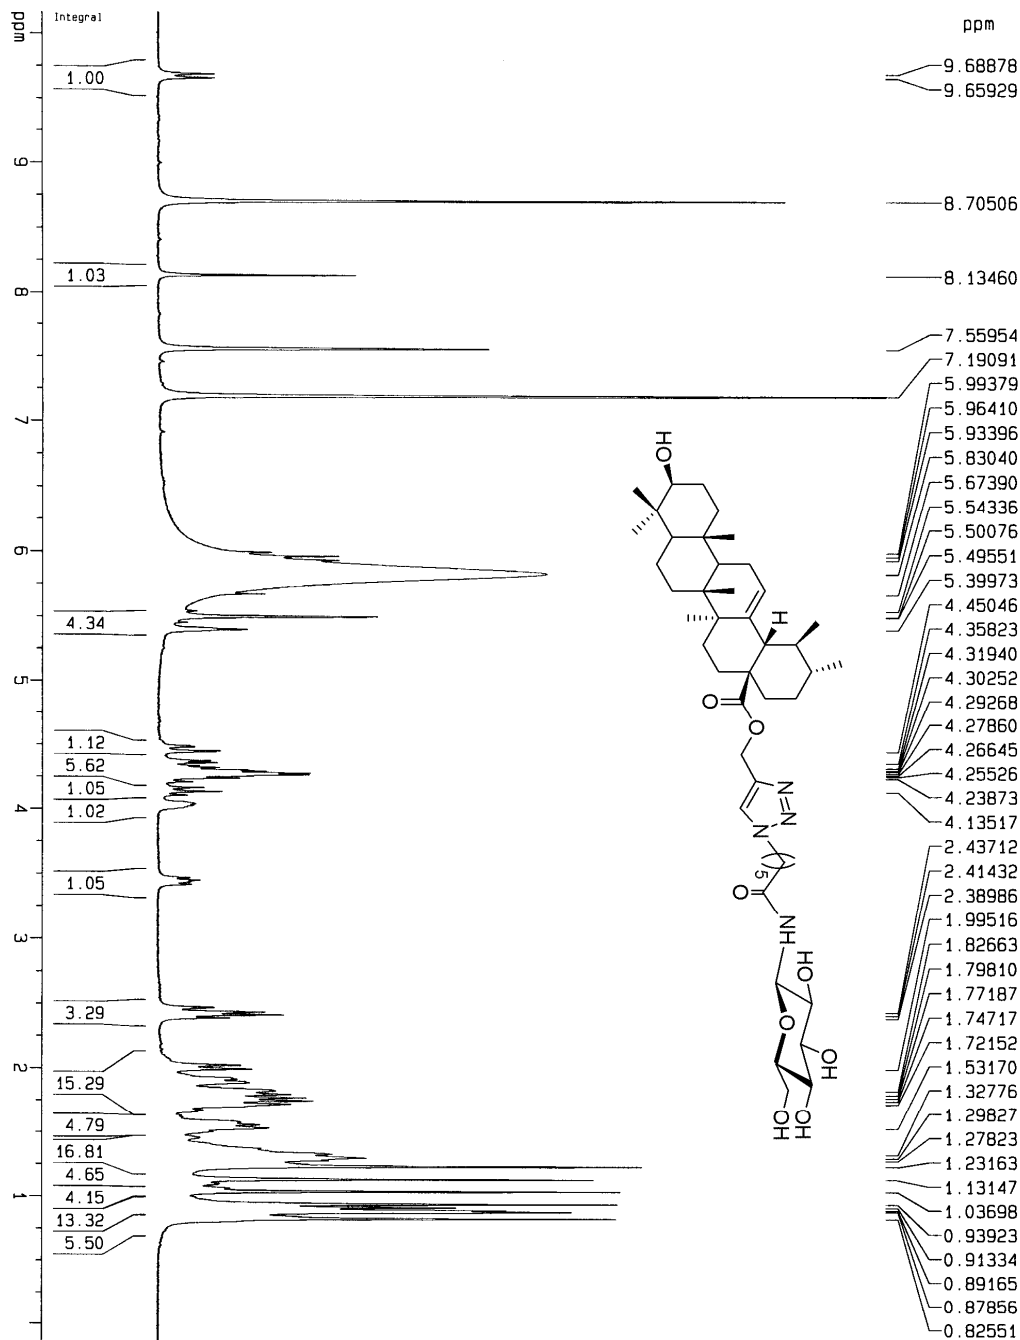

ppm

|         |
|---------|
| 9.68878 |
| 9.65929 |
| 8.70506 |
| 8.13460 |
| 7.55954 |
| 7.19091 |
| 5.99379 |
| 5.96410 |
| 5.93396 |
| 5.83040 |
| 5.67390 |
| 5.54336 |
| 5.50076 |
| 5.49551 |
| 5.39973 |
| 4.45046 |
| 4.35823 |
| 4.31940 |
| 4.30252 |
| 4.29268 |
| 4.27860 |
| 4.26645 |
| 4.25526 |
| 4.23873 |
| 4.13517 |
| 2.43712 |
| 2.41432 |
| 2.38986 |
| 1.99516 |
| 1.82663 |
| 1.79810 |
| 1.77187 |
| 1.74717 |
| 1.72152 |
| 1.53170 |
| 1.32776 |
| 1.29827 |
| 1.27823 |
| 1.23163 |
| 1.13147 |
| 1.03698 |
| 0.93923 |
| 0.91334 |
| 0.89165 |
| 0.87856 |
| 0.82551 |

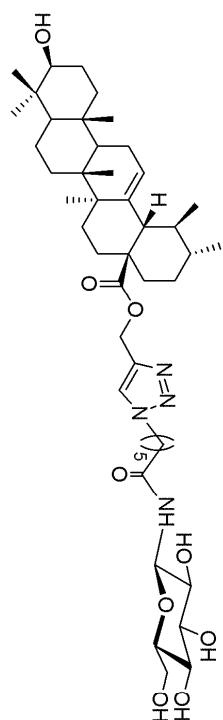

Current Data Parameters  
 NAME: shb  
 EXPNO: 918  
 PROCNO: 1

F2 - Acquisition Parameters  
 Date\_: 20080423  
 Time: 16:20  
 INSTRUM: spect  
 PROBHD: 5 mm QNP 1H/13  
 PULPROG: zg30  
 TD: 2880  
 SOLVENT: Pyr  
 NS: 16  
 DS: 0  
 SMH: 3981.988 Hz  
 FIDRES: 0.161884 Hz  
 AQ: 3.0886741 sec  
 RG: 256  
 DM: 128.800 usec  
 DE: 6.00 usec  
 TE: 298.0 K  
 D1: 2.00000000 sec

\*\*\*\*\* CHANNEL f1 \*\*\*\*\*  
 NUC1: 1H  
 P1: 6.00 usec  
 PL1: -4.00 dB  
 SFO1: 300.1315926 MHz

F2 - Processing parameters  
 SI: 32768  
 SF: 300.129914 MHz  
 WDW: EM  
 SSB: 0  
 LB: 0.20 Hz  
 GB: 0  
 PC: 1.00

1D NMR plot parameters  
 CX: 22.00 cm  
 CY: 12.00 cm  
 F1P: 10.166 ppm  
 F1: 3051.11 Hz  
 F2P: -0.144 ppm  
 F2: -43.13 Hz  
 PPM/CM: 0.46862 ppm/cm  
 HZ/CM: 140.64766 Hz/cm

Sub

kelly-161 13C-NMR CDCL3 303K AV-300

Current Data Parameters  
 NAME snb  
 EXPNO 941  
 PROCNO 1

F2 - Acquisition Parameters

Date\_ 20080425  
 Time 11.38  
 INSTRUM spect  
 PROBRD 5 mm QNP 1H/13  
 PULPROG zgpg30  
 TD 32768  
 SOLVENT FYP  
 NS 1189  
 DS 8  
 SWH 18115.941 Hz  
 FIDRES 0.552855 Hz  
 AQ 0.9044468 sec  
 RG 409600  
 DW 27.600 usec  
 DE 6.00 usec  
 TE 300.0 K  
 D1 2.00000000 sec  
 d11 0.03000000 sec

===== CHANNEL f1 =====  
 NUC1 13C  
 P1 8.00 usec  
 PL1 -2.00 dB  
 SFO1 75.4763978 MHz

===== CHANNEL f2 =====  
 CPOPRG2 waltz16  
 NUC2 1H  
 PCPD2 80.00 usec  
 PL2 -4.00 dB  
 PL12 19.25 dB  
 SFO2 300.1312005 MHz

F2 - Processing parameters  
 SI 32768  
 SF 75.467282 MHz  
 KDW EN  
 SSB 0  
 LB 1.00 Hz  
 GB 0  
 PC 1.00

ID NMR plot parameters  
 CX 22.50 cm  
 CY 30.00 cm  
 F1P 199.848 ppm  
 F1 15082.09 Hz  
 F2P -3.184 ppm  
 F2 -240.27 Hz  
 PPMCN 9.02364 ppm/cm  
 HZCM 690.99390 Hz/cm

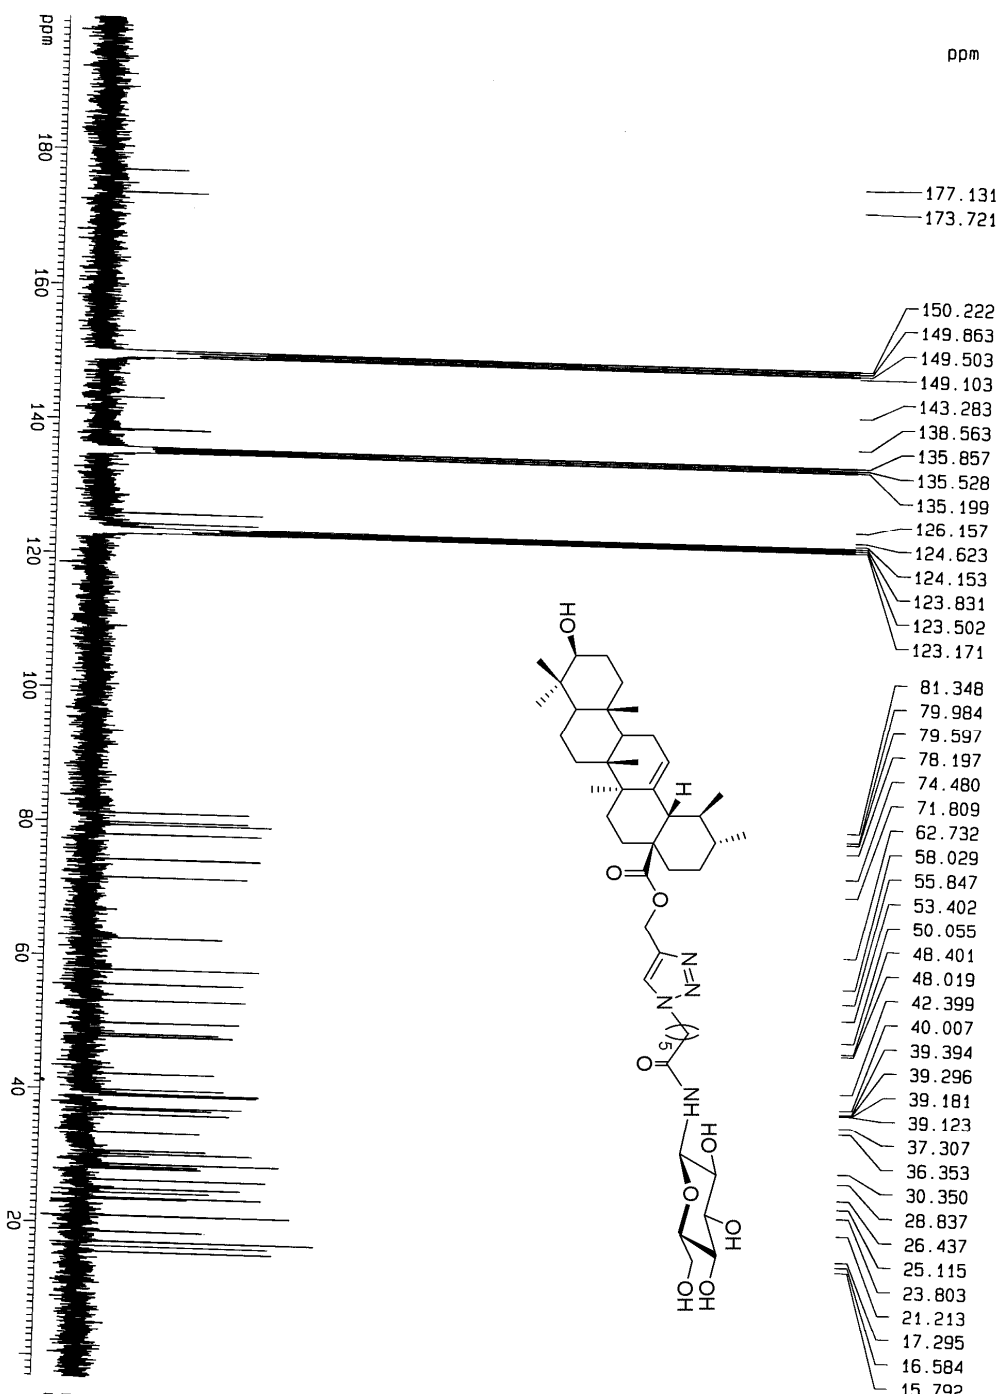

Kel11y-160 H1-NMR C5D5N 300K AV-300

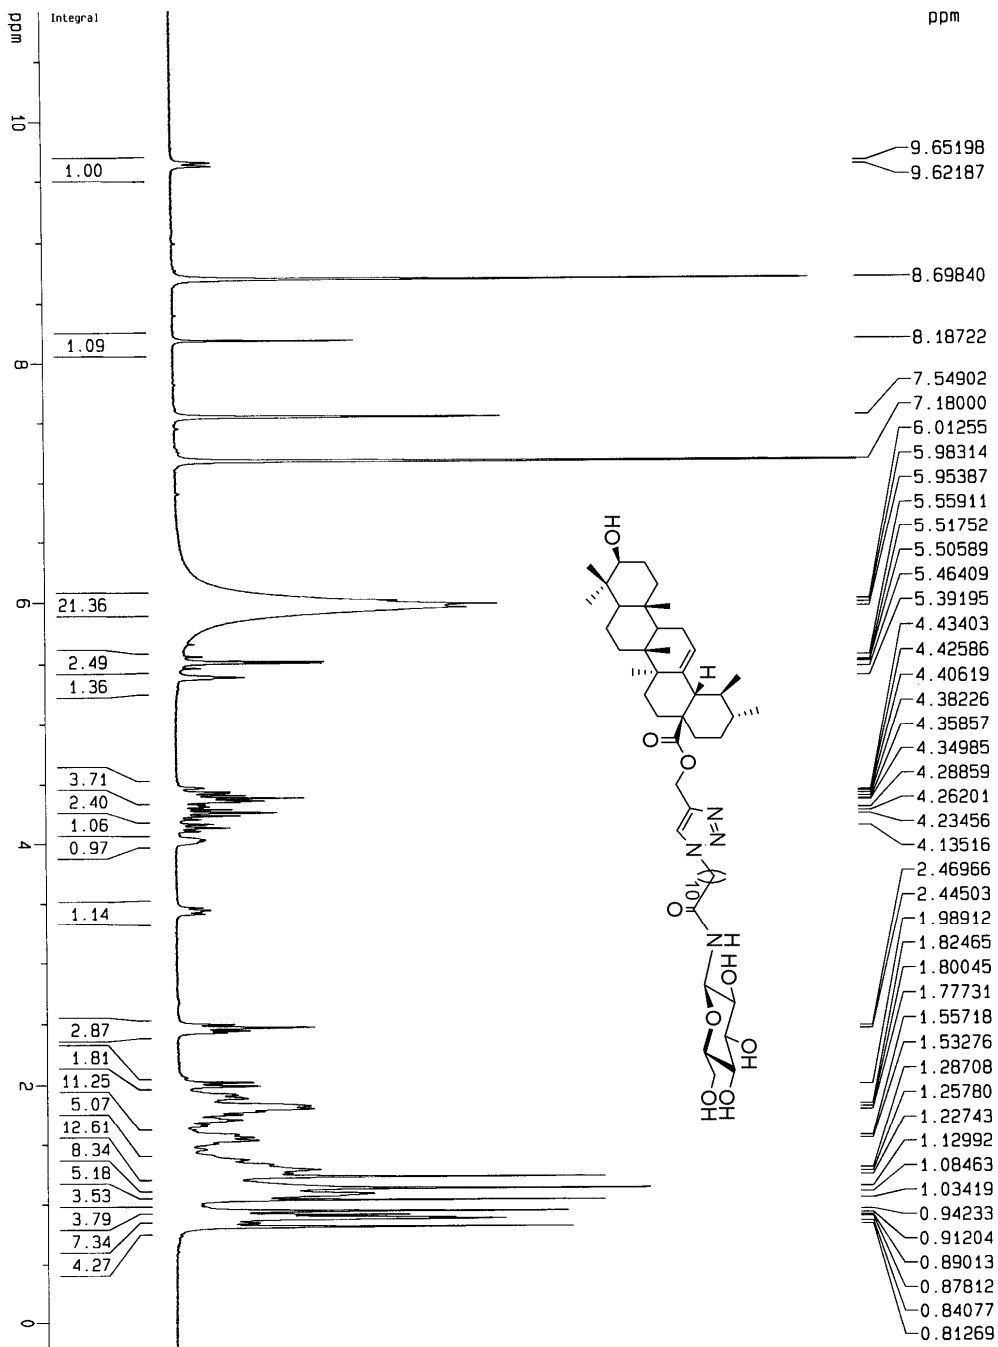

Current Data Parameters  
 NAME sfo  
 EXPNO 934  
 PROCNO 1

F2 - Acquisition Parameters  
 Date\_ 20080424  
 Time 14:13  
 INSTRUM Spect  
 PROBDH 5 mm QNP 1H/13  
 PULPROG zgpg30  
 TO 15430  
 SOLVENT Pyv  
 NS 16  
 DS 0  
 SWH 3858.025 Hz  
 FIDRES 0.250034 Hz  
 AQ 1.9997780 sec  
 RG 256  
 DM 129.600 usec  
 DE 6.00 usec  
 TE 303.0 K  
 D1 2.00000000 sec

===== CHANNEL f1 =====  
 NUC1 1H  
 P1 6.00 usec  
 PL1 -4.00 dB  
 SF01 300.1317627 MHz

F2 - Processing parameters  
 SI 32768  
 SF 300.1299946 MHz  
 NDM CK  
 SSB 0  
 LB 0.10 Hz  
 GB 0  
 PC 1.00

1D NMR plot parameters  
 CX 22.00 cm  
 CY 12.00 cm  
 FIP 10.922 ppm  
 F1 3277.91 Hz  
 F2 -0.256 ppm  
 F2 -70.82 Hz  
 PPMCH 0.50716 ppm/cm  
 HZCM 152.21498 Hz/cm

sub

Kelly-160 13C-NMR PYR-D5 300K AV-300

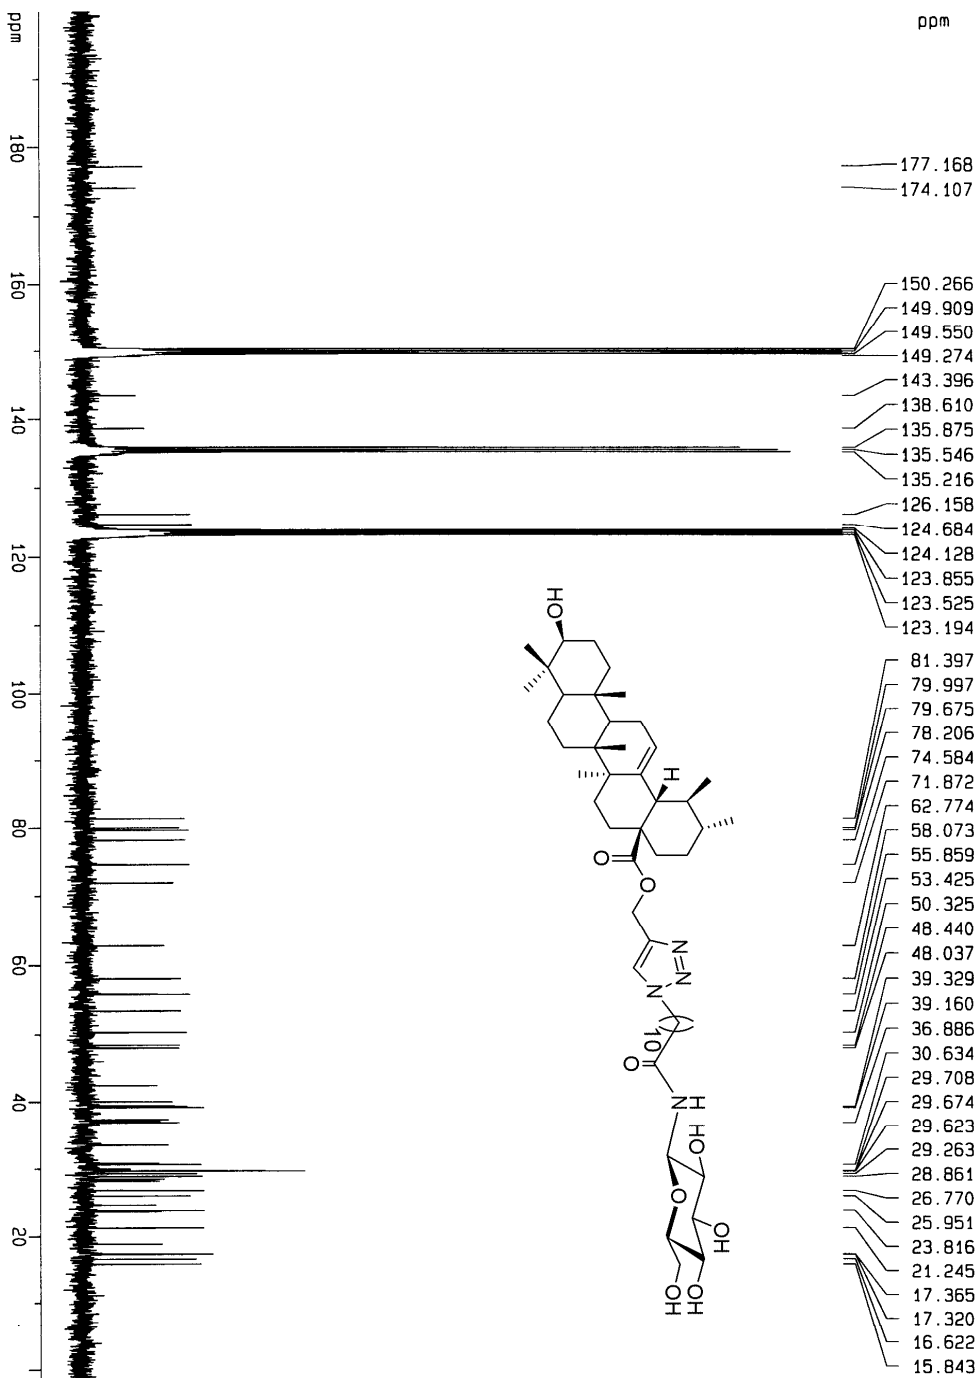

Current Data Parameters  
 NAME smp  
 EXPRNO 958  
 PROCNO 1

F2 - Acquisition Parameters  
 Date\_ 20080429  
 Time 16:29  
 INSTRUM spect  
 PROBRD 5 mm QNP 1H/13  
 PULPROG zgpg30  
 TD 32768  
 SOLVENT pyr  
 NS 1290  
 DS 8  
 SMH 18115.941 Hz  
 FIDRES 0.582865 Hz  
 AQ 0.304469 sec  
 RG 102400  
 DW 27.600 usec  
 DE 6.00 usec  
 TE 300.0 K  
 D1 2.00000000 sec  
 d11 0.03000000 sec

\*\*\*\*\* CHANNEL f1 \*\*\*\*\*  
 NUC1 13C  
 P1 8.00 usec  
 PL1 -2.00 dB  
 SF01 75.4753978 MHz

\*\*\*\*\* CHANNEL f2 \*\*\*\*\*  
 CPDPRG2 waltz16  
 NUC2 1H  
 PCPD2 80.00 usec  
 PL2 -4.00 dB  
 PL12 19.25 dB  
 SF02 300.1312005 MHz

F2 - Processing Parameters  
 SI 32768  
 SF 75.4676127 MHz  
 MDW EM  
 SSB 0  
 LB 1.00 Hz  
 GB 0  
 PC 1.00

10 NMR plot parameters:  
 CX 22.50 cm  
 CY 20.00 cm  
 F1p 199.959 ppm  
 F1 15090.46 Hz  
 F2p -1.354 ppm  
 F2 -102.18 Hz  
 PRICK 8.94726 ppm/cm  
 HZCM 675.22839 Hz/cm

KELLY-163 1H-NMR PYR-D5 303K AV-300

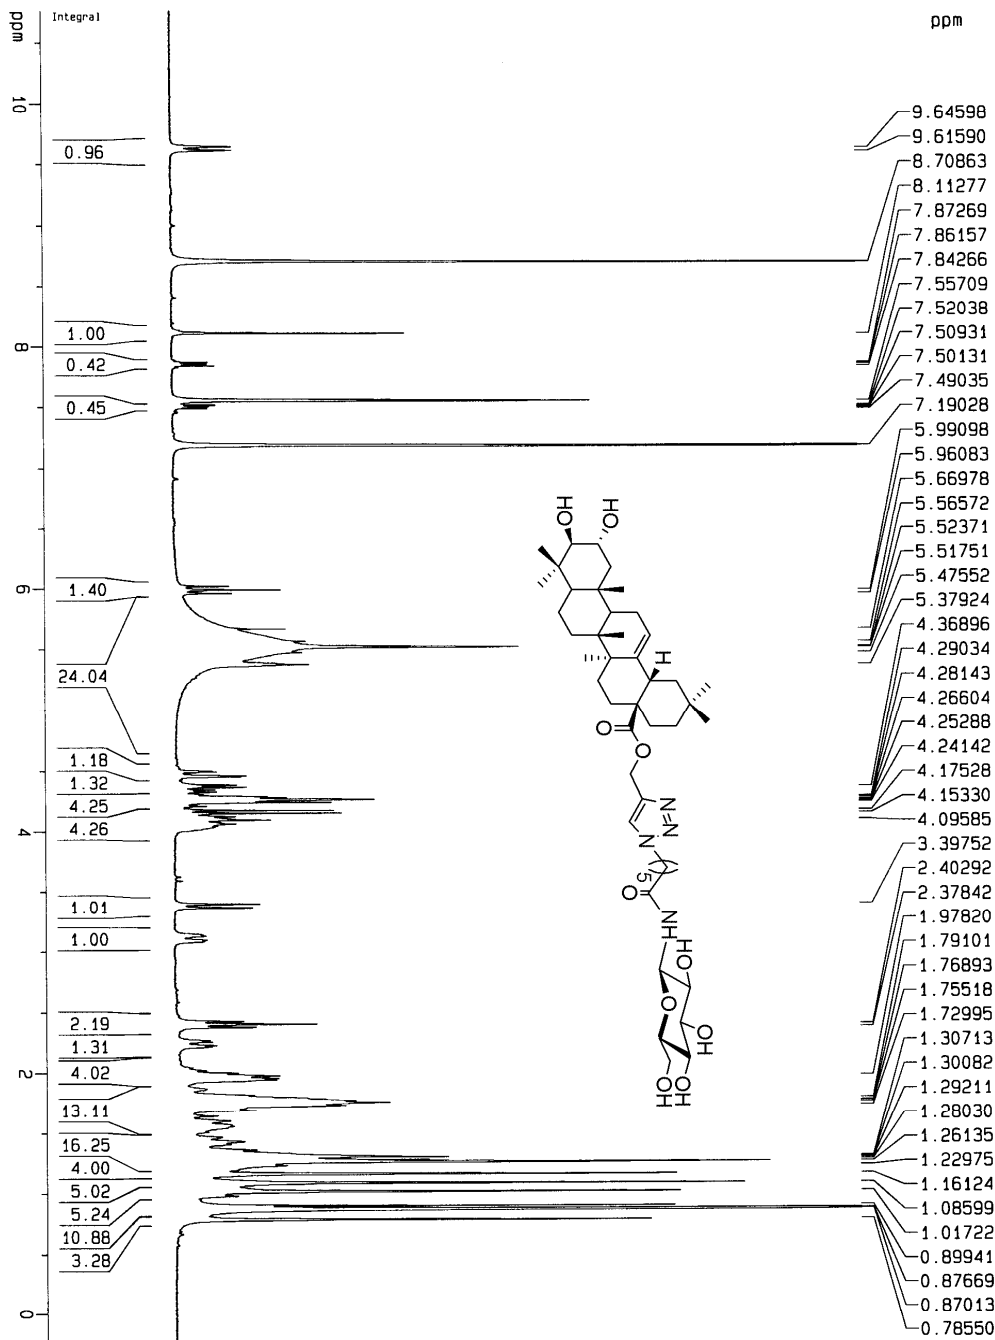

Current Data Parameters  
 NAME: spb  
 EXPNO: 947  
 PROCNO: 1

F2 - Acquisition Parameters  
 Date\_: 20080425  
 Time: 18.07  
 INSTRUM: spect  
 PROBRD: 5 mm QNP 1H/13  
 PULPROG: zg30  
 TO: 1312  
 SOLVENT: Pyr  
 NS: 32  
 DS: 0

SWH: 5341.880 Hz  
 FIDRES: 0.395143 Hz  
 AQ: 1.2647732 sec  
 RG: 362  
 DM: 93.600 usec  
 DE: 6.00 usec  
 TE: 303.0 K  
 D1: 2.00000000 sec

\*\*\*\*\* CHANNEL f1 \*\*\*\*\*  
 NUC1: 1H  
 P1: 6.00 usec  
 PL1: -4.00 dB  
 SFO1: 300.1324245 MHz

F2 - Processing parameters  
 SI: 32768  
 SF: 300.1299317 MHz  
 MDW: EM  
 SSB: 0  
 LB: 0.10 Hz  
 GB: 0  
 PC: 1.00

1D NMR plot parameters  
 CX: 22.00 cm  
 CY: 15.00 cm  
 F1P: 10.767 ppm  
 F1: 3231.57 Hz  
 F2P: -0.253 ppm  
 F2: -75.90 Hz  
 PUNCH: 0.50092 ppm/cm  
 HZCM: 150.33986 Hz/cm

KELLY-163 13C-NMR PYR-D5 300K AV-300

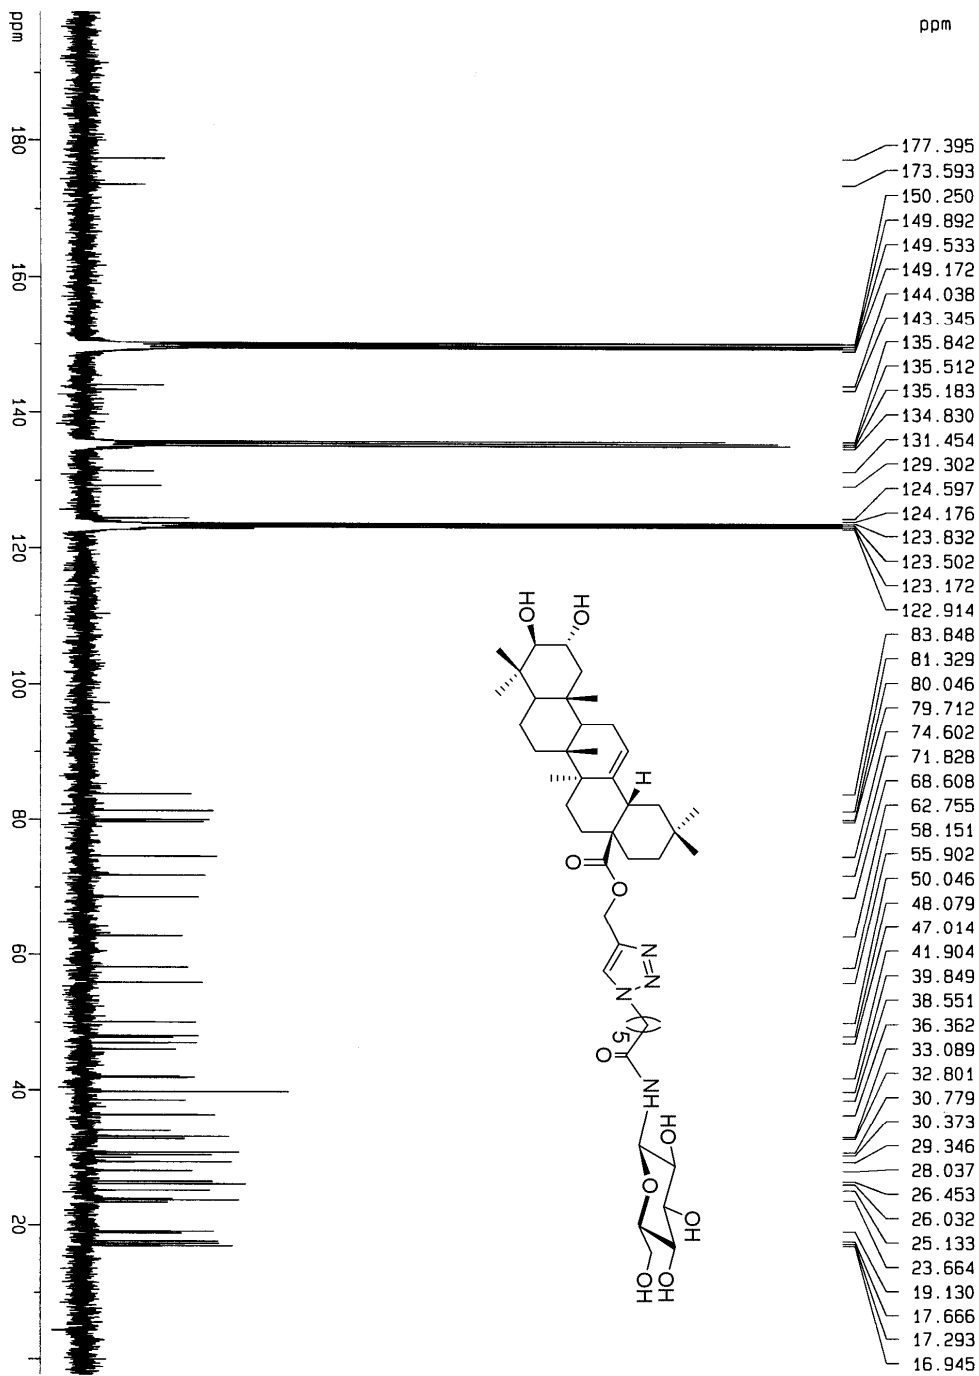

Current Data Parameters

|        |     |
|--------|-----|
| NAME   | shb |
| EXPNO  | 970 |
| PROCNO | 1   |

F2 - Acquisition Parameters

|         |                |
|---------|----------------|
| Date_   | 20080429       |
| Time    | 21.35          |
| INSTRUM | spect          |
| PROBHD  | 5 mm QNP 1H/13 |
| PULPROG | zgpg           |
| TD      | 32768          |
| SOLVENT | PYR            |
| NS      | 929            |
| DS      | 8              |
| SMH     | 18115.941 Hz   |
| FIDRES  | 0.552655 Hz    |
| AQ      | 0.5044468 sec  |
| RG      | 102400         |
| DW      | 27.600 usec    |
| DE      | 6.00 usec      |
| TE      | 300.0 K        |
| D1      | 2.00000000 sec |
| d11     | 0.03000000 sec |

===== CHANNEL f1 =====

|      |                |
|------|----------------|
| NUC1 | 13C            |
| P1   | 8.00 usec      |
| PL1  | -2.00 dB       |
| SFO1 | 75.4763978 MHz |

===== CHANNEL f2 =====

|         |                 |
|---------|-----------------|
| CPDPRG2 | waltz16         |
| NUC2    | 1H              |
| PCPD2   | 80.00 usec      |
| PL2     | -4.00 dB        |
| PL12    | 19.25 dB        |
| SFO2    | 300.1312005 MHz |

F2 - Processing parameters

|     |               |
|-----|---------------|
| SI  | 32768         |
| SF  | 75.467277 MHz |
| WDW | EM            |
| SSB | 0             |
| LB  | 1.00 Hz       |
| GB  | 0             |
| PC  | 1.00          |

10 NMR plot parameters

|       |                 |
|-------|-----------------|
| CX    | 22.50 cm        |
| CY    | 20.00 cm        |
| F1P   | 199.001 ppm     |
| F1    | 15018.16 Hz     |
| F2P   | -2.312 ppm      |
| F2    | -174.48 Hz      |
| PRNOM | 8.94725 ppm/cm  |
| HZCM  | 675.22839 Hz/cm |

KELLY-164 1H-NMR PYR-D5 303K AV-300

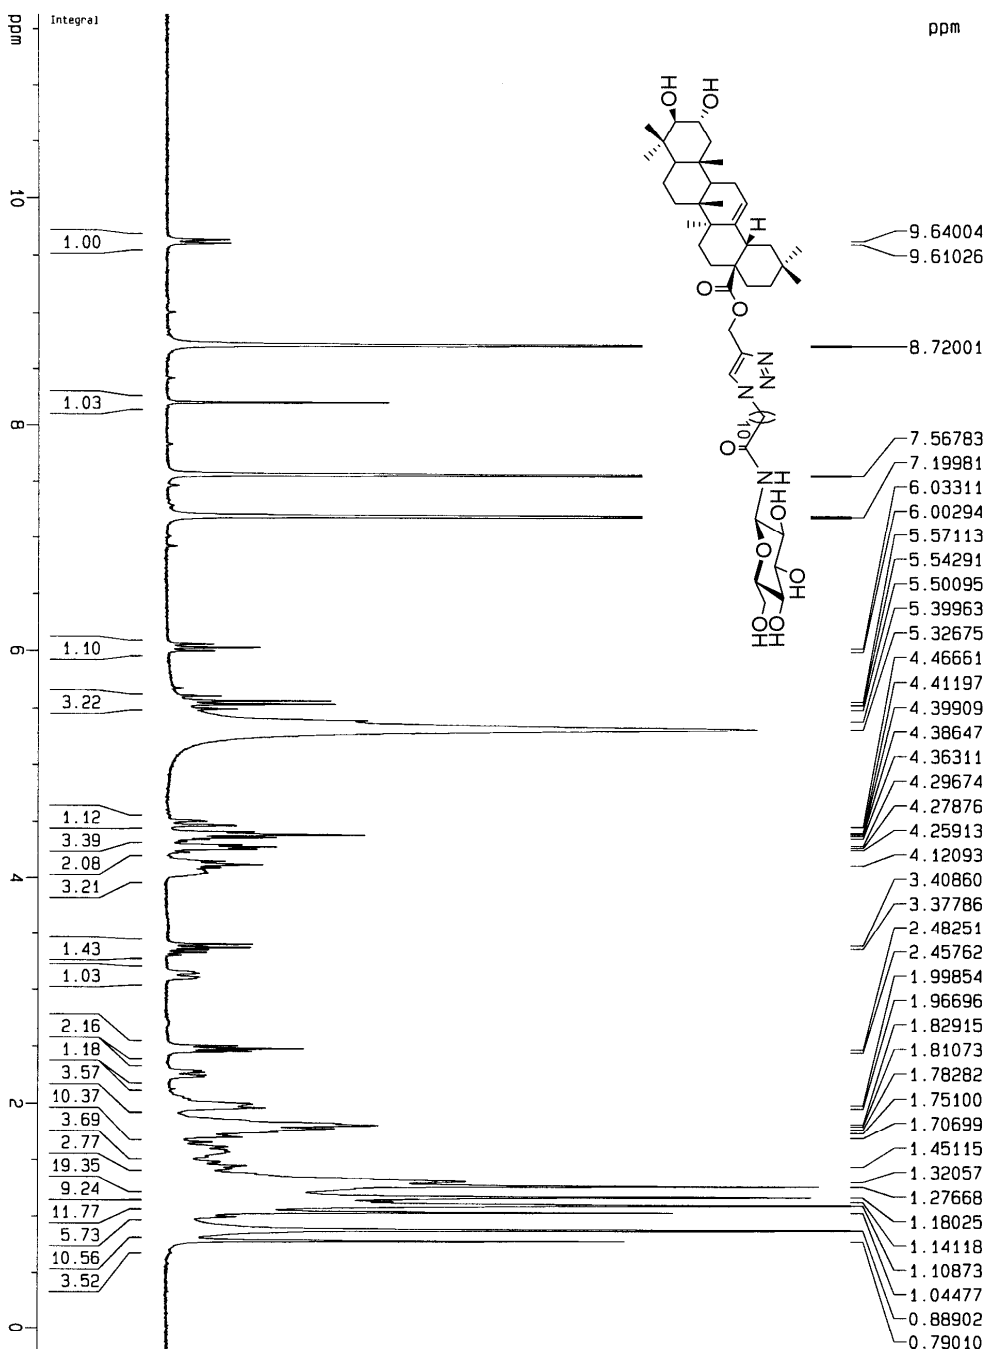

Current Data Parameters  
 NAME sn5  
 EXPNO 945  
 PROCNO 1

F2 - Acquisition Parameters  
 Date\_ 20080425  
 Time 15:58  
 INSTRUM spect  
 PROBHD 5 mm QNP 1H/13  
 PULPROG zgpg30  
 TD 13812  
 SOLVENT P13  
 NS 32  
 DS 0  
 SMH 5341.880 Hz  
 FIDRES 0.395343 Hz  
 AQ 1.264722 sec  
 RG 1024  
 DM 93.600 usec  
 DE 5.00 usec  
 TE 303.0 K  
 D1 2.00000000 sec

\*\*\*\*\* CHANNEL f1 \*\*\*\*\*  
 NUC1 1H  
 P1 6.00 usec  
 PL1 -4.00 dB  
 SF01 300.1324245 MHz

F2 - Processing parameters  
 SI 32768  
 SF 300.1299887 MHz  
 MVM EM  
 SSB 0  
 LB 0.10 Hz  
 GB 0  
 PC 1.00

10 NMR plot parameters  
 CX 22.00 cm  
 CY 30.00 cm  
 F1p 11.630 ppm  
 F1 3450.44 Hz  
 F2p -0.222 ppm  
 F2 -66.66 Hz  
 PPMCM 0.539172 ppm/cm  
 HZCM 161.66605 Hz/cm



Kelly-164 13C-NMR PYR-D5 300K AV-300

Current Data Parameters  
 NAME shb  
 EXPNO 971  
 PROCNO 1

F2 - Acquisition Parameters  
 Date\_ 20080429  
 Time 22:17  
 INSTRUM spect  
 PROBHD 5 mm QNP 1H/13  
 PULPROG zgpg  
 TO 32768  
 SOLVENT pyr  
 NS 2110  
 DS 8  
 SFORES 18115.941 Hz  
 FIDRES 0.552855 Hz  
 AQ 0.59044468 sec  
 RG 102400  
 DW 27.600 usec  
 DE 6.00 usec  
 TE 300.0 K  
 D1 2.00000000 sec  
 d11 0.03000000 sec

===== CHANNEL f1 =====  
 NUC1 13C  
 P1 8.00 usec  
 PL1 -2.00 dB  
 SF01 75.4763978 MHz

===== CHANNEL f2 =====  
 CPDPRG2 waltz16  
 NUC2 1H  
 P2 80.00 usec  
 PL2 -4.00 dB  
 PL12 19.25 dB  
 SF02 300.1312005 MHz

F2 - Processing parameters  
 SI 32768  
 SF 75.4677277 MHz  
 MDW FM  
 SSB 0  
 LB 1.00 Hz  
 GB 0  
 PC 1.00

10 NMR plot parameters  
 CX 22.50 cm  
 CY 50.00 cm  
 F1p 202.111 ppm  
 F1 15252.87 Hz  
 F2p -3.78 Hz  
 F2 -8.98495 ppm/cm  
 PPMCH 678.07355 Hz/cm  
 HZCM

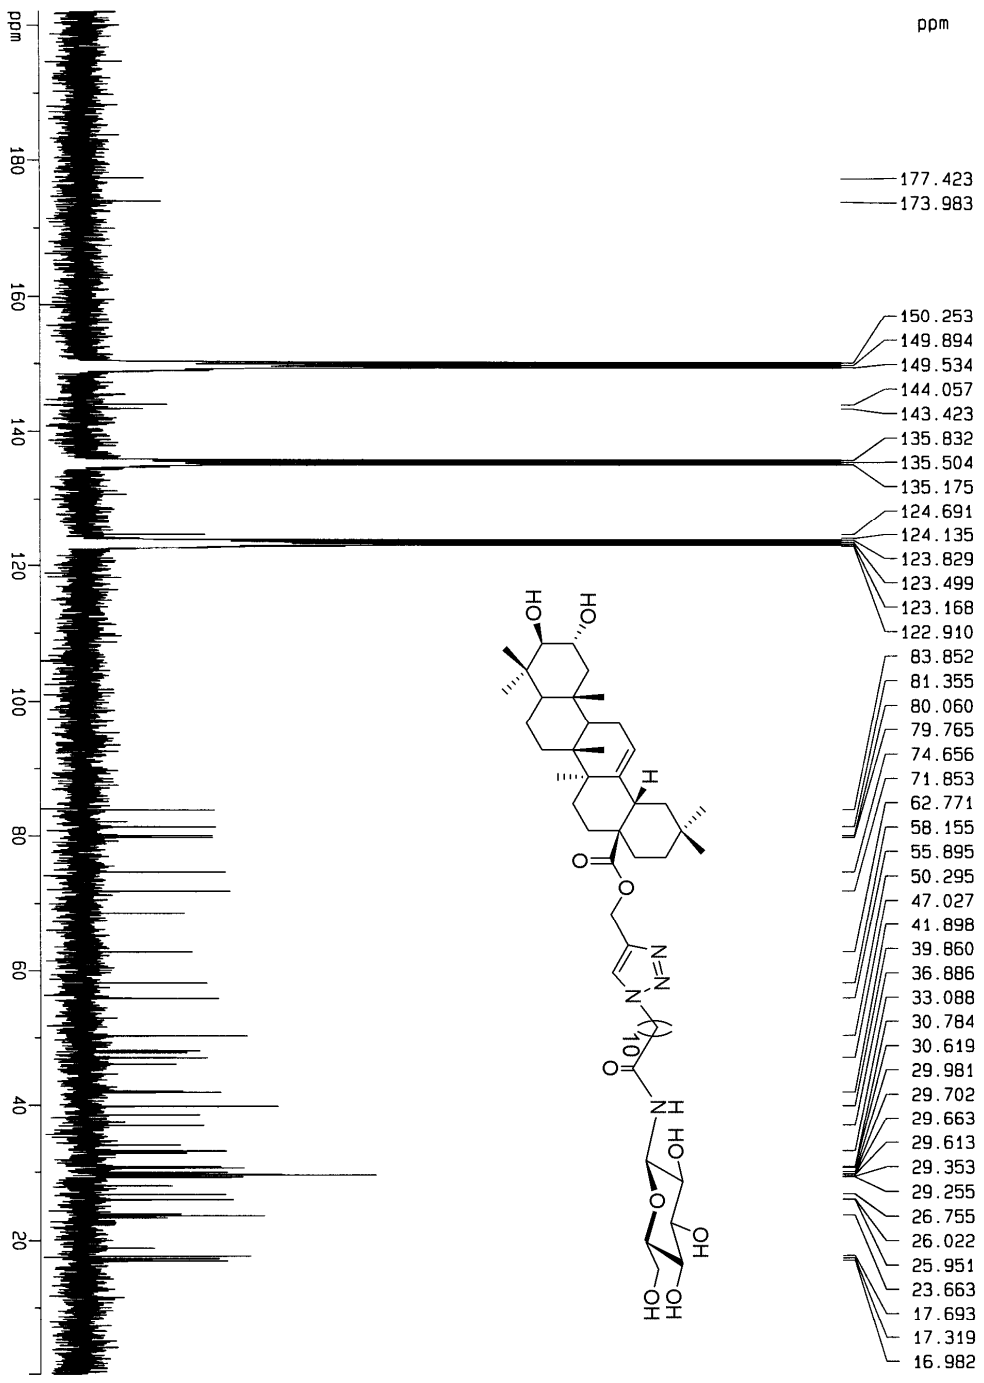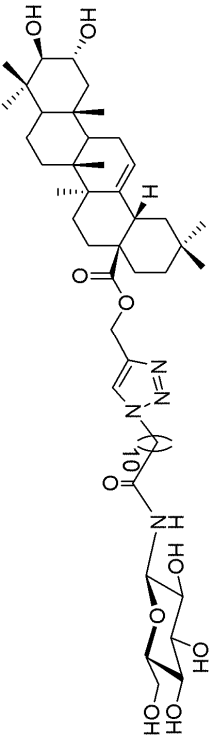

KELLY-162 1H-NMR PYR-05 303K AV-300

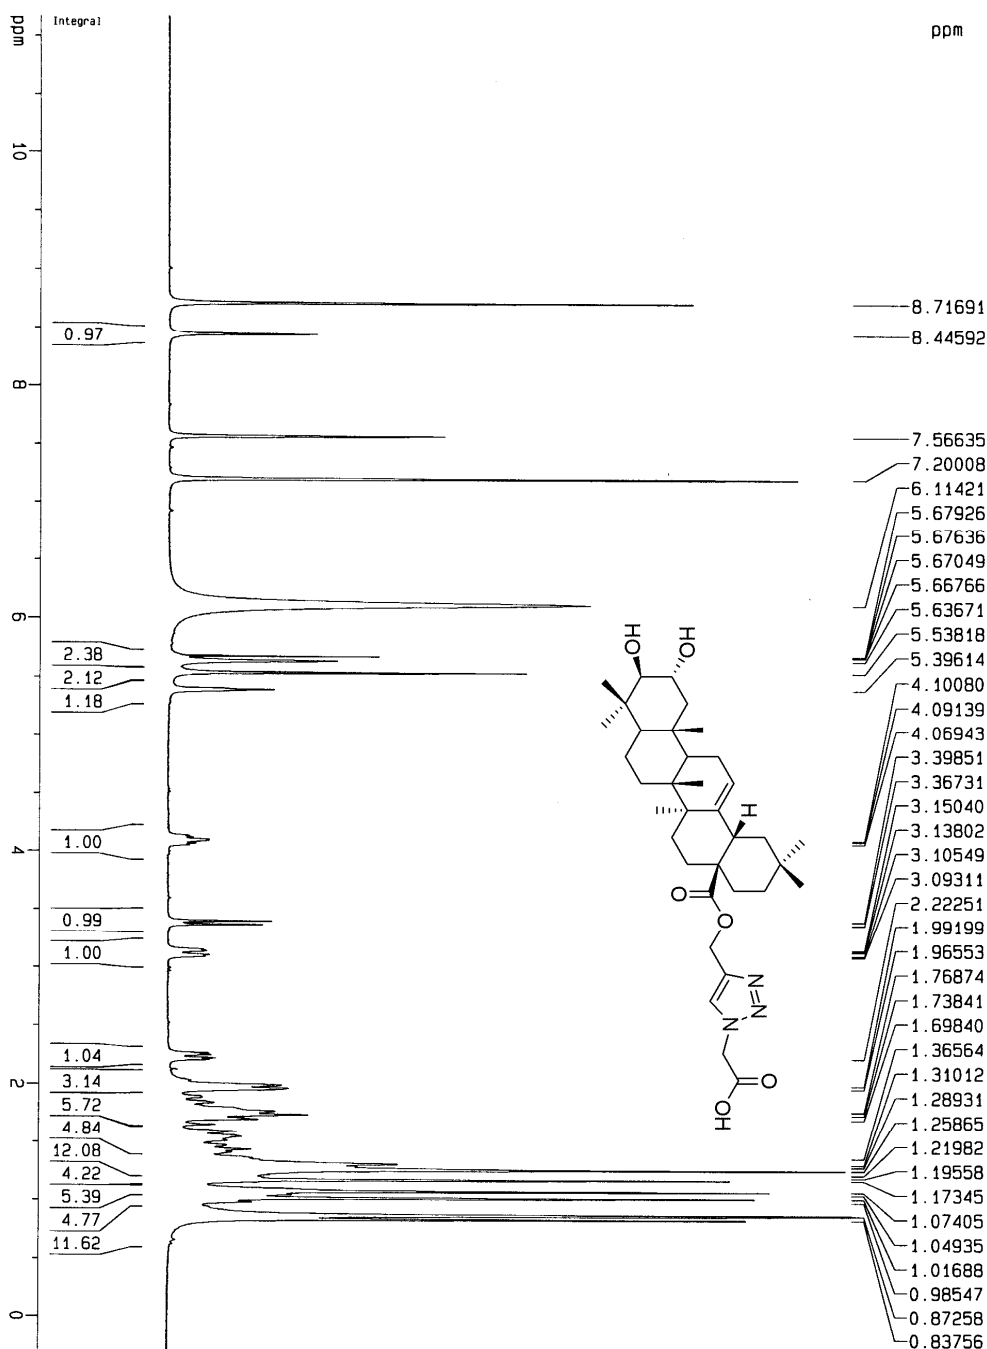

Current Data Parameters  
 NAME SHD  
 EXPNO 946  
 PROCNO 1

F2 - Acquisition Parameters  
 Date\_ 20080425  
 Time 16:12  
 INSTRUM spect  
 PROBRD 5 mm QNP 1H/13  
 PULPROG zgpg30  
 TD 2930  
 FIDRES 1.264722 sec  
 AQ 1.264722 sec  
 RG 302  
 DW 93.600 usec  
 DE 6.00 usec  
 TE 303.0 K  
 D1 2.00000000 sec

\*\*\*\*\* CHANNEL f1 \*\*\*\*\*  
 NUC1 13C  
 P1 6.00 usec  
 PL1 -4.00 dB  
 SF01 300.1324245 MHz  
 F2 - Processing parameters  
 SI 32768  
 SF 300.1299887 MHz  
 KW 0  
 SSB 0  
 LB 0.10 Hz  
 GB 0  
 PC 1.00

10 NMR plot parameters  
 CX 22.00 cm  
 CY 15.00 cm  
 FIP 11.172 ppm  
 F1 3353.45 Hz  
 F2 -0.305 ppm  
 PPMCM 0.52171 ppm/cm  
 HZCM 156.58017 Hz/cm

KELLY-162 13C-NMR PYR-D5 300K AV-300

Current Data Parameters  
 NAME snb  
 EXPNO 969  
 PROCNO 1

F2 - Acquisition Parameters  
 Date\_ 20080429  
 Time 17.58  
 INSTRUM spect  
 PROCNO 5 mm QNP 1H/13  
 PULPROG zgpg30  
 TD 32768  
 SOLVENT Pyr  
 NS 1876  
 DS 8  
 SMH 18115.941 Hz  
 FIDRES 0.552855 Hz  
 AQ 0.9044468 sec  
 RG 102400  
 DM 27.600 usec  
 DE 6.00 usec  
 TE 300.0 K  
 D1 2.00000000 sec  
 d11 0.03000000 sec

\*\*\*\*\* CHANNEL f1 \*\*\*\*\*  
 NUC1 13C  
 P1 8.00 usec  
 PL1 -2.00 dB  
 SFO1 75.4763978 MHz

\*\*\*\*\* CHANNEL f2 \*\*\*\*\*  
 CPDPRG2 waltz16  
 NUC2 1H  
 PCPD2 80.00 usec  
 PL2 -4.00 dB  
 PL12 19.25 dB  
 SFO2 300.1312005 MHz

F2 - Processing parameters  
 SI 32768  
 SF 75.467277 MHz  
 KDN EM  
 SSB 0  
 LB 1.00 Hz  
 GB 0  
 PC 1.00

1D NMR pilot parameters  
 CX 22.50 cm  
 CY 20.00 cm  
 F1P 194.760 ppm  
 F1 14698.08 Hz  
 F2P -0.898 ppm  
 F2 -67.79 Hz  
 PPRGN 8.65982 ppm/cm  
 HZCM 656.26129 Hz/cm

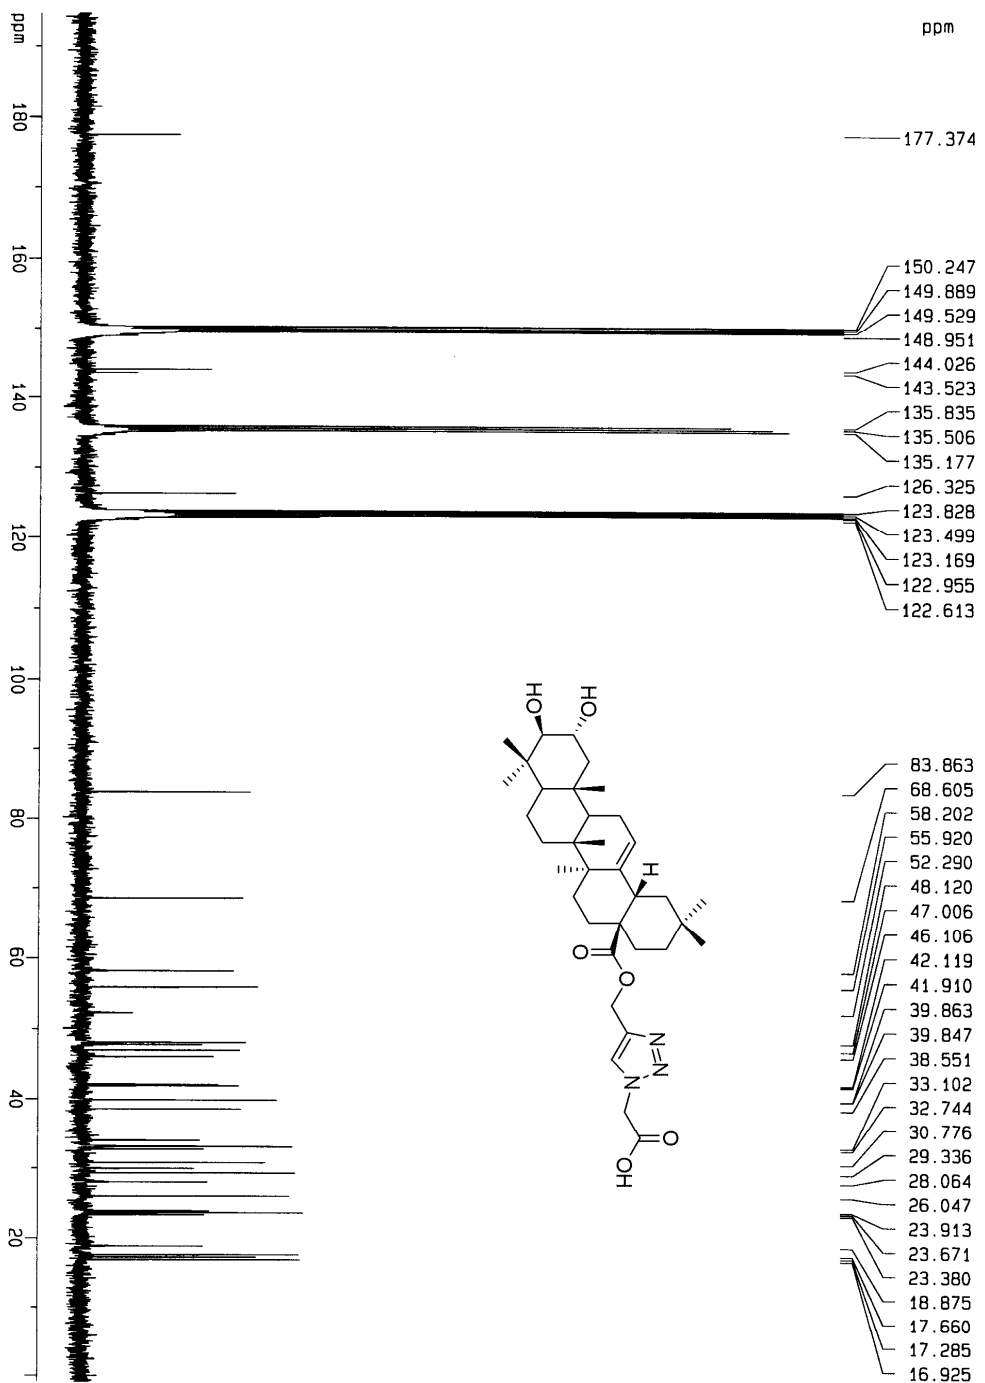

- 177.374
- 150.247
- 149.889
- 149.529
- 148.951
- 144.026
- 143.523
- 135.835
- 135.506
- 135.177
- 126.325
- 123.828
- 123.499
- 123.169
- 122.955
- 122.613
- 83.863
- 68.605
- 58.202
- 55.920
- 52.290
- 48.120
- 47.006
- 46.106
- 42.119
- 41.910
- 39.863
- 39.847
- 38.551
- 33.102
- 32.744
- 30.776
- 29.336
- 28.064
- 26.047
- 23.913
- 23.671
- 23.380
- 18.875
- 17.660
- 17.285
- 16.925
